# Supplementary material for: Transition metal-free C(sp3)–H selenation of β-ketosulfones
Source: Royal Society of Chemistry journal article supplement (doi:10.1039/d4ob00006d), 2024-01-01

## transition metal-free C(sp<sup>3</sup>)-H selenation of $\beta$ -ketosulfones

Dilshat Abdukerem<sup>†</sup>, Hui Chen<sup>†</sup>, Zechuan Mao, Kun Xia, Wenli Zhu,  
Changhong Liu, Yuming Yu, Ablimit Abdukader \*

*State Key Laboratory of Chemistry and Utilization of Carbon Based Energy  
Resources; College of Chemistry, Xinjiang University, Urumqi, 830017, Xinjiang  
Uygur Autonomous Region, PR China.*

*E-mail: [ablimit1970@126.com](mailto:ablimit1970@126.com)*

## Supporting Information

### List of Content

|                                                                               |    |
|-------------------------------------------------------------------------------|----|
| 1. General Experimental .....                                                 | 1  |
| 2. General procedure for preparation of $\beta$ -ketosulfones compounds ..... | 1  |
| 3. General procedure for preparation of Diselenides compounds.....            | 1  |
| 4. Optimization of reaction conditions .....                                  | 2  |
| 5 General procedure for the synthesis of product.....                         | 3  |
| 6. Gram-scale experiment .....                                                | 3  |
| 7. Control experiment .....                                                   | 4  |
| 8. X-Ray crystallographic data of products 3a.....                            | 5  |
| 9. Analytical data for 3a-3v, 4a-4q, 5a .....                                 | 7  |
| 10. References.....                                                           | 18 |
| 11. Spectra Data .....                                                        | 19 |

## 1. General Experimental

All reagents were purchased at the highest commercial quality and used without further purification. Reactions were monitored by thin layer chromatography (TLC) using ultra violet light (UV) as the visualizing agent. Flash column chromatography was performed on silica gel (particle size 200–300 mesh) and eluted with petroleum ether/ethyl acetate. Nuclear magnetic resonance spectra (NMR) were recorded on Bruker AV-600 instruments and were calibrated using residual undeuterated solvent as an internal reference ( $^1\text{H}$  NMR:  $\text{CHCl}_3$  7.26 ppm,  $^{13}\text{C}$  NMR:  $\text{CHCl}_3$  77.16 ppm). High resolution mass spectra (HRMS) were recorded on a Q-TOF mass spectrometer (Agilent G6545B, Germany). The following abbreviations were used to indicate multiplicities: s = singlet, d = doublet, t = triplet, q = quartet, dd = doublet of doublets, dt = doublet of triplets, m = multiplet).

## 2. General procedure for preparation of $\beta$ -ketosulfones compounds

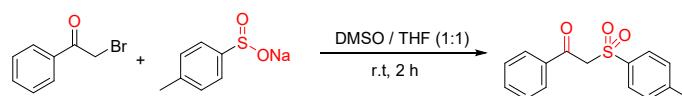

Sodium sulfonates ( $\text{RSO}_2\text{Na}$ , 6.0 mmol) was added to a solution of substituted 2-bromoacetophenones (5.0 mmol) in a cosolvent of DMSO and THF (20 mL, v/v = 1:1) at rt. The reaction mixture was stirred at 2 h. The reaction mixture was partitioned with  $\text{CH}_2\text{Cl}_2$  ( $3 \times 30$  mL) and water (30 mL). The combined organic layers were washed with brine, dried, filtered, and evaporated to afford crude  $\beta$ -ketosulfones under reduced pressure. Crude  $\beta$ -ketosulfones were recrystallized from EtOAc in nearly quantitative yields.  $\beta$ -Ketosulfones are known compounds and the analytical data are consistent with those in previous literature <sup>1</sup>.

## 3. General procedure for preparation of Diselenides compounds

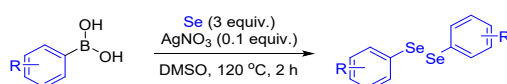

To a Schlenk tube were added arylboronic acid (0.4 mmol), selenium (1.2 mmol),  $\text{AgNO}_3$  (0.04 mmol), and DMSO (2.0 mL). The mixture was stirred in a heating mantle preheated to 120 °C for 2 h. After cooled to room temperature, the reaction mixture was

diluted with H<sub>2</sub>O (10 mL), and extracted with ethyl acetate (3×10 mL). The combined organic phase was washed with water and brine (30 mL), dried over anhydrous Na<sub>2</sub>SO<sub>4</sub>, and then evaporated under reduced pressure. The residue was purified by column chromatography to give the desired diselen <sup>2</sup>.

#### 4. Optimization of reaction conditions

**Table 4.1.** Optimization of reaction conditions

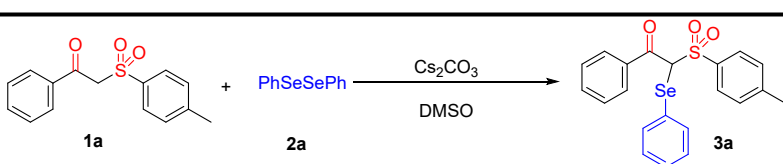

| Entry | Oxidant | Temperature | Time (h) | Yield |
|-------|---------|-------------|----------|-------|
| 1     | air     | rt          | 4        | 42%   |
| 2     | air     | rt          | 6        | 63%   |
| 3     | air     | rt          | 8        | 85%   |
| 4     | air     | rt          | 10       | 91%   |
| 5     | air     | rt          | 12       | 93%   |
| 6     | air     | rt          | 14       | 94%   |
| 7     | air     | rt          | 24       | 93%   |
| 8     | air     | 40 °C       | 6        | 85%   |
| 9     | air     | 60 °C       | 2        | 80%   |
| 10    | air     | 80 °C       | 1        | 78%   |

Reaction conditions: **1a** (0.2 mmol scale, 1 equiv), **2a** (0.8 equiv) Cs<sub>2</sub>CO<sub>3</sub> (1.2 equiv), and DMSO (2 mL).

## 5 General procedure for the synthesis of product

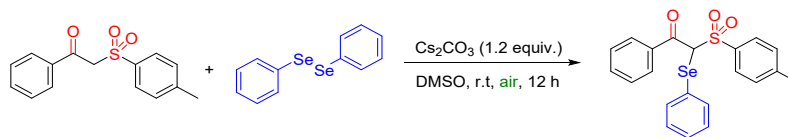

A mixture of  $\beta$ -ketosulfones **1** (0.20 mmol), diselenides **2** (0.16 mmol), and  $\text{Cs}_2\text{CO}_3$  (0.45 mmol) in DMSO (2.0 mL) was placed in a test tube (25 mL) equipped with a magnetic stirring bar. The reaction mixture was stirred at room temperature for 12 h. After the reaction was completed, the mixture addition of satd aq NaCl (5 mL). Further stirring was followed by extraction with ethyl acetate (3 $\times$ 15 mL). The organic layer was dried with anhydrous  $\text{MgSO}_4$ , concentrated in vacuo and purified by flash silica gel chromatography using petroleum ether/ethyl acetate (8:1) to give the desired prod.

## 6. Gram-scale experiment

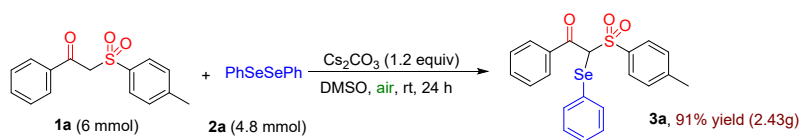

A mixture of  $\beta$ -ketosulfones **1a** (6 mmol), diselenides **2a** (4.8 mmol), and  $\text{Cs}_2\text{CO}_3$  (7.2 mmol) in DMSO (30.0 mL) was placed in a Schlenk tube (100 mL) equipped with a magnetic stirring bar. The reaction mixture was stirred at room temperature for 24 h. After the reaction was completed, the mixture addition of satd aq NaCl (50 mL). Further stirring was followed by extraction with ethyl acetate (3 $\times$ 30 mL). The organic layer was dried with anhydrous  $\text{MgSO}_4$ , concentrated in vacuo and purified by flash silica gel chromatography using petroleum ether/ethyl acetate (8:1) to afford **3a** (2.34 g, 91 %) as white solid.

## 7. Control experiment

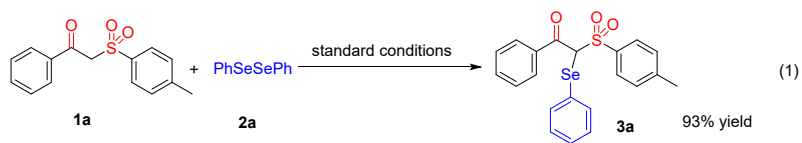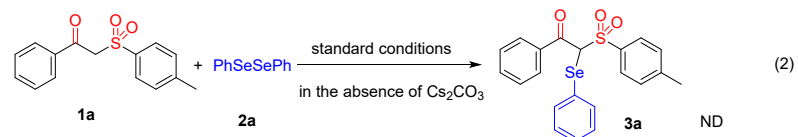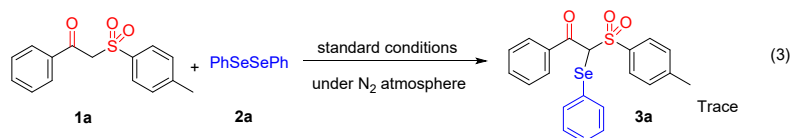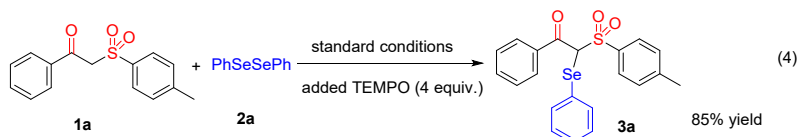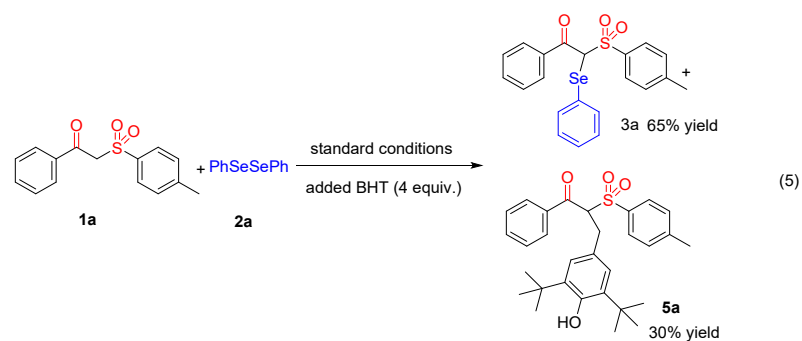

<sup>a</sup> Standard conditions: **1a** (0.2 mmol), **2a** (0.16 mmol), Cs<sub>2</sub>CO<sub>3</sub> (0.24 mmol), DMSO (2 mL), at room temperature, air, and 12 h. Isolated yields. ND = not detected.

**8. X-Ray crystallographic data of products 3a****Table 8.1.** Crystal parameters of compound **3a** (CCDC: 2288402)

|                    |                                                                 |                                 |                    |
|--------------------|-----------------------------------------------------------------|---------------------------------|--------------------|
| Bond precision:    | C-C = 0.0242 Å                                                  |                                 | Wavelength=0.71073 |
| Cell:              | a=10.005(4)                                                     | b=11.035(4)                     | c=18.194(7)        |
|                    | alpha=90                                                        | beta=101.800(7)                 | gamma=90           |
| Temperature:       | 296 K                                                           |                                 |                    |
|                    | Calculated                                                      | Reported                        |                    |
| Volume             | 1966.3(13)                                                      | 1966.2(13)                      |                    |
| Space group        | P 21/n                                                          | P 1 21/n 1                      |                    |
| Hall group         | -P 2yn                                                          | -P 2yn                          |                    |
| Moiety formula     | C21 H18 O3 S Se                                                 | C21 H18 O3 S Se                 |                    |
| Sum formula        | C21 H18 O3 S Se                                                 | C21 H18 O3 S Se                 |                    |
| Mr                 | 429.37                                                          | 429.37                          |                    |
| Dx,g cm-3          | 1.450                                                           | 1.451                           |                    |
| Z                  | 4                                                               | 4                               |                    |
| Mu (mm-1)          | 2.033                                                           | 2.033                           |                    |
| F000               | 872.0                                                           | 872.0                           |                    |
| F000'              | 872.46                                                          |                                 |                    |
| h,k,lmax           | 13,14,23                                                        | 13,14,23                        |                    |
| Nref               | 4710                                                            | 4544                            |                    |
| Tmin,Tmax          |                                                                 | 0.569,0.746                     |                    |
| Tmin'              |                                                                 |                                 |                    |
| Correction method= | # Reported T Limits: Tmin=0.569 Tmax=0.746 AbsCorr = MULTI-SCAN |                                 |                    |
| Data completeness= | 0.965                                                           | Theta(max)= 27.928              |                    |
| R(reflections)=    | 0.1494( 3182)                                                   | wR2(reflections)= 0.4049( 4544) |                    |
| S =                | 1.141                                                           | Npar= 237                       |                    |

The crystal of product **3a** was obtained by slow evaporation in ethanol. The single crystal X-ray analysis determined the structure of product **3a** (Figure 7.1) as expected.

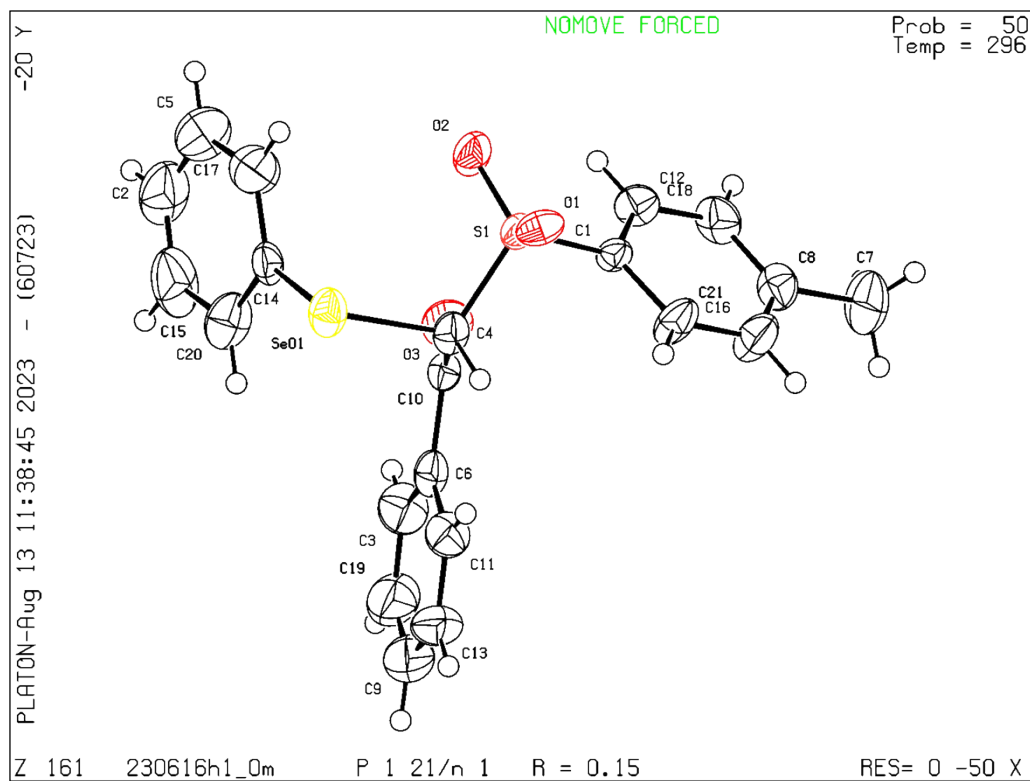

Displacement ellipsoids are drawn at 50% probability level.

**Figure 8.1.** The crystal structure of compound **3a** (CCDC: 2288402).

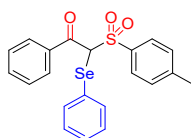

**3a**  
CCDC: 2288402

## 9. Analytical data for 3a-3v, 4a-4q, 5a

### 1-phenyl-2-(phenylselanyl)-2-tosylethan-1-one (3a)

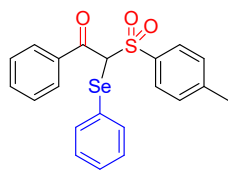

White solid, (80 mg, 93%), Mp: 95-97 °C;  $^1\text{H NMR}$  (600 MHz,  $\text{CDCl}_3$ )  $\delta$  7.90 (d,  $J = 8.4$  Hz, 2H), 7.79 (d,  $J = 7.22$  Hz, 2H), 7.58 (t,  $J = 7.6$  Hz, 3H), 7.42 (t,  $J = 6.6$  Hz, 3H), 7.37 (t,  $J = 7.22$  Hz, 3H), 7.32 (d,  $J = 7.8$  Hz, 2H), 7.28 (t,  $J = 7.8$  Hz, 2H), 5.78 (s, 1H), 2.44 (s, 3H).  $^{13}\text{C NMR}$  (151 MHz,  $\text{CDCl}_3$ )  $\delta$  189.7, 145.6, 135.8, 135.2, 134.2, 134.1, 130.7, 129.7, 129.6, 129.4, 129.1, 128.9, 127.9, 68.4, 21.8. **HRMS** (+ESI-TOF):  $m/z$   $[\text{M} + \text{H}]^+$  calcd for  $\text{C}_{21}\text{H}_{19}\text{O}_3\text{SSe}$ : 431.0215; found: 431.0216.

### 2-(phenylselanyl)-1-(p-tolyl)-2-tosylethan-1-one (3b)

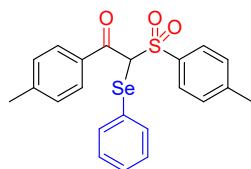

White solid, (75.8 mg, 85%), Mp: 119-120 °C;  $^1\text{H NMR}$  (600 MHz,  $\text{CDCl}_3$ )  $\delta$  7.89 (d,  $J = 7.8$  Hz, 2H), 7.70 (d,  $J = 8.4$  Hz, 2H), 7.60 (dd,  $J = 8.4, 1.2$  Hz, 2H), 7.37 (t,  $J = 7.8$  Hz, 1H), 7.31 (d,  $J = 7.8$  Hz, 2H), 7.28 (t,  $J = 7.8$  Hz, 2H), 7.22 (d,  $J = 8.4$  Hz, 2H), 5.76 (s, 1H), 2.43 (s, 3H), 2.40 (s, 3H).  $^{13}\text{C NMR}$  (151 MHz,  $\text{CDCl}_3$ )  $\delta$  189.3, 145.5, 145.5, 135.8, 134.1, 132.7, 130.7, 129.7, 129.6, 129.4, 129.3, 128.1, 68.5, 21.9, 21.9. **HRMS** (+ESI-TOF):  $m/z$   $[\text{M} + \text{H}]^+$  calcd for  $\text{C}_{22}\text{H}_{21}\text{O}_3\text{SSe}$ : 445.0371; found: 445.0360.

### 1-(4-methoxyphenyl)-2-(phenylselanyl)-2-tosylethan-1-one (3c)

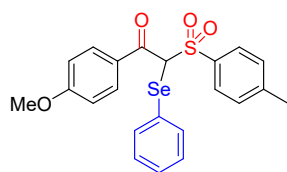

White solid, (82.7 mg, 90%), Mp: 81-83 °C;  $^1\text{H NMR}$  (600 MHz,  $\text{CDCl}_3$ )  $\delta$  7.88 (d,  $J = 7.8$  Hz, 2H), 7.80 (d,  $J = 9.0$  Hz, 2H), 7.60 (dd,  $J = 7.8, 1.2$  Hz, 2H), 7.37 (t,  $J = 7.2$  Hz, 1H), 7.31 (d,  $J = 7.8$  Hz, 2H), 7.28 (t,  $J = 7.8$  Hz, 2H), 6.89 (d,  $J = 9.0$  Hz, 2H), 5.74 (s, 1H), 3.87 (s, 3H), 2.44 (s, 3H).  $^{13}\text{C NMR}$  (151 MHz,  $\text{CDCl}_3$ )  $\delta$  188.2, 164.5, 145.5, 135.7, 134.0, 131.7, 130.7, 129.6, 129.5, 129.4, 128.3, 128.1, 114.2, 68.7, 55.7, 21.9. **HRMS** (+ESI-TOF):  $m/z$   $[\text{M} + \text{H}]^+$  calcd for  $\text{C}_{22}\text{H}_{21}\text{O}_4\text{SSe}$ : 461.0320; found: 461.0317.

### 1-(4-ethoxyphenyl)-2-(phenylselanyl)-2-tosylethan-1-one (3d)

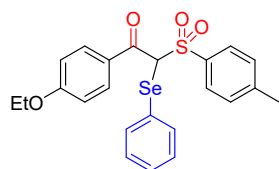

White solid, (89 mg, 92%), Mp: 111-112 °C;  $^1\text{H NMR}$  (600 MHz,  $\text{CDCl}_3$ )  $\delta$  7.87 (d,  $J = 7.8$  Hz, 2H), 7.78 (d,  $J = 9.0$  Hz,



2H), 7.60 (dd,  $J = 8.4, 1.2$  Hz, 2H), 7.36 (t,  $J = 7.2$  Hz, 1H), 7.30 (d,  $J = 7.8$  Hz, 2H), 7.27 (d,  $J = 7.2$  Hz, 2H), 6.86 (d,  $J = 8.4$  Hz, 2H), 5.74 (s, 1H), 4.09 (q,  $J = 7.2$  Hz, 2H), 2.43 (s, 3H), 1.43 (t,  $J = 7.8$  Hz, 3H).  $^{13}\text{C}$  NMR (151 MHz,  $\text{CDCl}_3$ )  $\delta$  188.1, 164.0, 145.4, 135.7, 134.0, 131.7, 130.9, 129.6, 129.5, 129.4, 128.3, 127.9, 114.6, 68.6, 64.1, 21.8, 14.7. **HRMS** (+ESI-TOF):  $m/z$   $[\text{M} + \text{H}]^+$  calcd for  $\text{C}_{23}\text{H}_{23}\text{O}_4\text{SSe}$ : 475.0477; found: 475.0476.

### 1-(4-fluorophenyl)-2-(phenylselanyl)-2-tosylethan-1-one (3e)

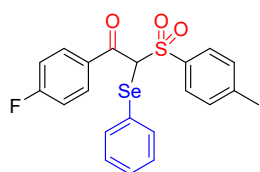

White solid, (84 mg, 94%), Mp: 83-85 °C;  $^1\text{H}$  NMR (600 MHz,  $\text{CDCl}_3$ )  $\delta$  7.89 (d,  $J = 8.4$  Hz, 2H), 7.84 (dd,  $J = 8.4, 4.8$  Hz, 2H), 7.57 (d,  $J = 7.2$  Hz, 2H), 7.37 (t,  $J = 7.8$  Hz, 1H), 7.33 (d,  $J = 8.4$  Hz, 2H), 7.28 (t,  $J = 7.8$  Hz, 2H), 7.09 (t,  $J = 8.4$  Hz, 2H), 5.72 (s, 1H), 2.44 (s, 3H).  $^{13}\text{C}$  NMR (151 MHz,  $\text{CDCl}_3$ )  $\delta$  188.3, 167.3 (d,  $J_{\text{C-F}} = 255.8$  Hz), 145.7, 135.8, 133.9, 132.0 (d,  $J_{\text{C-F}} = 9.5$  Hz), 131.6 (d,  $J_{\text{C-F}} = 2.6$  Hz), 130.7, 129.8, 129.7, 129.5, 127.9, 116.2 (d,  $J_{\text{C-F}} = 21.8$  Hz), 68.6, 21.9. **HRMS** (+ESI-TOF):  $m/z$   $[\text{M} + \text{H}]^+$  calcd for  $\text{C}_{21}\text{H}_{18}\text{FO}_3\text{SSe}$ : 449.0120; found: 449.0112.

### 1-(4-bromophenyl)-2-(phenylselanyl)-2-tosylethan-1-one (3f)

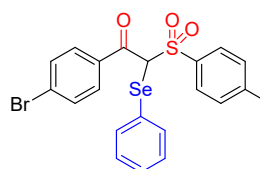

White solid, (96 mg, 94%), Mp: 93-94 °C;  $^1\text{H}$  NMR (600 MHz,  $\text{CDCl}_3$ )  $\delta$  7.88 (d,  $J = 8.4$  Hz, 2H), 7.65 (d,  $J = 8.4$  Hz, 2H), 7.56 (t,  $J = 5.4$  Hz, 4H), 7.38 (t,  $J = 7.8$  Hz, 1H), 7.32 (d,  $J = 7.8$  Hz, 2H), 7.28 (t,  $J = 7.8$  Hz, 2H), 5.69 (s, 1H), 2.44 (s, 3H).  $^{13}\text{C}$  NMR (151 MHz,  $\text{CDCl}_3$ )  $\delta$  188.8, 145.7, 135.8, 133.9, 133.9, 132.3, 130.7, 130.5, 129.9, 129.7, 129.7, 129.5, 127.8, 68.4, 21.9. **HRMS** (+ESI-TOF):  $m/z$   $[\text{M} + \text{H}]^+$  calcd for  $\text{C}_{21}\text{H}_{18}\text{BrO}_3\text{SSe}$ : 508.9319; found: 508.9309.

### 1-(4-iodophenyl)-2-(phenylselanyl)-2-tosylethan-1-one (3g)

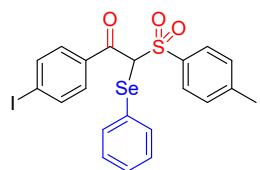

White solid, (105.1 mg, 95%), Mp: 73-75 °C;  $^1\text{H}$  NMR (600 MHz,  $\text{CDCl}_3$ )  $\delta$  7.88 (d,  $J = 7.8$  Hz, 2H), 7.78 (d,  $J = 8.4$  Hz, 2H), 7.57 (dd,  $J = 7.8, 1.2$  Hz, 2H), 7.49 (d,  $J = 9.0$  Hz, 2H), 7.38 (t,  $J = 7.8$  Hz, 1H), 7.32 (d,  $J = 7.8$  Hz, 2H), 7.28 (t,  $J = 7.8$  Hz, 2H), 5.68 (s, 1H), 2.44 (s, 3H).  $^{13}\text{C}$  NMR (151 MHz,  $\text{CDCl}_3$ )  $\delta$  189.1, 145.7, 138.3, 135.8,

134.4, 133.9, 130.7, 130.3, 129.9, 129.7, 129.5, 127.8, 102.7, 68.4, 21.9. **HRMS** (+ESI-TOF):  $m/z$   $[M + H]^+$  calcd for  $C_{21}H_{18}IO_3SSe$ : 556.9181; found: 556.9172.

### 1-(3,4-dichlorophenyl)-2-(phenylselanyl)-2-tosylethan-1-one (3h)

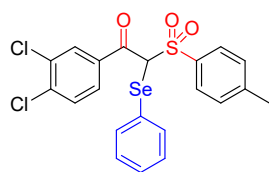

Yellow solid, (89.7 mg, 90%), Mp: 115-116 °C;  $^1H$  NMR (600 MHz,  $CDCl_3$ )  $\delta$  7.89 (d,  $J = 8.4$  Hz, 2H), 7.80 (d,  $J = 2.4$  Hz, 1H), 7.62 (dd,  $J = 8.4, 1.8$  Hz, 1H), 7.57 (d,  $J = 6.6$  Hz, 2H), 7.50 (d,  $J = 8.4$  Hz, 1H), 7.40 (t,  $J = 7.2$  Hz, 1H), 7.34 (d,  $J = 8.4$  Hz, 2H), 7.30 (t,  $J = 7.2$  Hz, 2H), 5.62 (s, 1H), 2.45 (s, 3H).  $^{13}C$  NMR (151 MHz,  $CDCl_3$ )  $\delta$  187.6, 145.9, 139.0, 135.9, 134.7, 133.9, 133.7, 131.0, 130.9, 130.7, 130.1, 129.8, 129.6, 128.0, 127.6, 68.5, 21.9, **HRMS** (+ESI-TOF):  $m/z$   $[M + H]^+$  calcd for  $C_{21}H_{17}Cl_2O_3SSe$ : 498.9435; found: 498.9426.

### 4-(2-(phenylselanyl)-2-tosylacetyl)benzonitrile(3i)

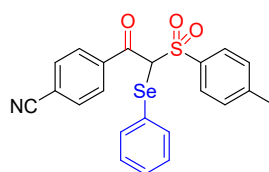

White solid, (89.3 mg, 98%), Mp: 111-112 °C;  $^1H$  NMR (600 MHz,  $CDCl_3$ )  $\delta$  7.89 (t,  $J = 8.4$  Hz, 4H), 7.71 (d,  $J = 8.4$  Hz, 2H), 7.52 (d,  $J = 7.2$  Hz, 2H), 7.38 (t,  $J = 7.8$  Hz, 1H), 7.34 (d,  $J = 7.8$  Hz, 2H), 7.28 (t,  $J = 7.8$  Hz, 2H), 5.70 (s, 1H), 2.45 (s, 3H).  $^{13}C$  NMR (151 MHz,  $CDCl_3$ )  $\delta$  188.5, 146.0, 138.2, 135.8, 133.8, 132.7, 130.6, 130.1, 129.8, 129.6, 129.4, 127.4, 117.7, 117.3, 68.5, 21.9. **HRMS** (+ESI-TOF):  $m/z$   $[M + H]^+$  calcd for  $C_{22}H_{18}NO_3SSe$ : 456.0167; found: 456.0168.

### 1-(4-nitrophenyl)-2-(phenylselanyl)-2-tosylethan-1-one (3j)

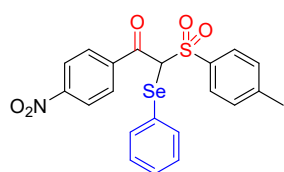

White solid, (86.0 mg, 91%), Mp: 118-120 °C;  $^1H$  NMR (600 MHz,  $CDCl_3$ )  $\delta$  8.25 (d,  $J = 8.4$  Hz, 2H), 7.95 (d,  $J = 8.4$  Hz, 2H), 7.91 (d,  $J = 7.8$  Hz, 2H), 7.53 (d,  $J = 7.2$  Hz, 2H), 7.39 (t,  $J = 7.8$  Hz, 1H), 7.35 (d,  $J = 7.8$  Hz, 2H), 7.28 (t,  $J = 7.2$  Hz, 2H), 5.72 (s, 1H), 2.46 (s, 3H).  $^{13}C$  NMR (151 MHz,  $CDCl_3$ )  $\delta$  188.3, 150.8, 146.0, 139.7, 135.8, 133.8, 130.7, 130.2, 130.1, 129.8, 129.7, 127.4, 124.0, 68.7, 21.90. **HRMS** (+ESI-TOF):  $m/z$   $[M + H]^+$  calcd for  $C_{21}H_{18}NO_5SSe$ : 476.0065; found: 476.0063.

### 1-(4-(methylsulfonyl)phenyl)-2-(phenylselanyl)-2-tosylethan-1-one (3k)

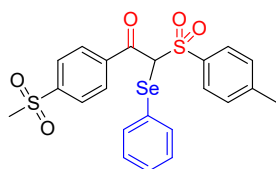

White solid, (89.3 mg, 88%), Mp: 149-150 °C;  $^1\text{H NMR}$  (600 MHz,  $\text{CDCl}_3$ )  $\delta$  7.98 (q,  $J = 8.4\text{Hz}$ , 4H), 7.90 (d,  $J = 8.4\text{ Hz}$ , 2H), 7.53 (d,  $J = 7.2\text{ Hz}$ , 2H), 7.38 (t,  $J = 7.8\text{ Hz}$ , 1H), 7.34 (d,  $J = 8.4\text{ Hz}$ , 2H), 7.28 (t,  $J = 7.8\text{ Hz}$ , 2H), 5.73 (s, 1H), 3.07 (s, 3H), 2.45 (s, 3H).  $^{13}\text{C NMR}$  (151 MHz,  $\text{CDCl}_3$ )  $\delta$  188.6, 146.0, 145.0, 139.2, 135.7, 133.8, 130.6, 130.1, 129.9, 129.8, 129.6, 128.0, 127.5, 68.6, 44.4, 21.9. **HRMS** (+ESI-TOF):  $m/z$   $[\text{M} + \text{H}]^+$  calcd for  $\text{C}_{22}\text{H}_{21}\text{O}_5\text{S}_2\text{Se}$ : 508.9990; found: 508.9982.

### 1-(phenylselanyl)-1-tosylpropan-2-one (3l)

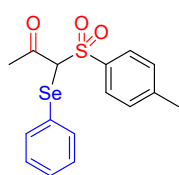

White solid, (70.9 mg, 96%), Mp: 92-93 °C;  $^1\text{H NMR}$  (600 MHz,  $\text{CDCl}_3$ )  $\delta$  7.83 (d,  $J = 8.4\text{ Hz}$ , 2H), 7.48 (d,  $J = 7.2\text{ Hz}$ , 2H), 7.35 – 7.33 (m, 3H), 7.27 – 7.24 (m, 3H), 4.77 (s, 1H), 2.46 (s, 3H), 2.45 (s, 3H).  $^{13}\text{C NMR}$  (151 MHz,  $\text{CDCl}_3$ )  $\delta$  196.7, 145.8, 135.2, 134.1, 129.8, 129.8, 129.7, 129.6, 127.5, 73.6, 29.0, 21.9. **HRMS** (+ESI-TOF):  $m/z$   $[\text{M} + \text{H}]^+$  calcd for  $\text{C}_{16}\text{H}_{17}\text{O}_3\text{SSe}$ : 369.0058; found: 369.0053.

### 1-phenyl-2-(phenylselanyl)-2-(phenylsulfonyl)ethan-1-one (3m)

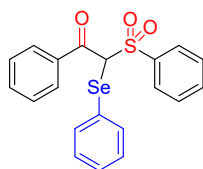

White solid, (81.8 mg, 98%), Mp: 156-157 °C;  $^1\text{H NMR}$  (600 MHz,  $\text{CDCl}_3$ )  $\delta$  8.03 (dd,  $J = 8.4, 1.2\text{ Hz}$ , 2H), 7.77 (dd,  $J = 8.4, 1.2\text{ Hz}$ , 2H), 7.63 (t,  $J = 7.2\text{ Hz}$ , 1H), 7.58 – 7.51 (m, 5H), 7.40 (t,  $J = 8.4\text{ Hz}$ , 2H), 7.36 (t,  $J = 7.8\text{ Hz}$ , 1H), 7.26 (t,  $J = 7.8\text{Hz}$ , 2H), 5.79 (s, 1H).  $^{13}\text{C NMR}$  (151 MHz,  $\text{CDCl}_3$ )  $\delta$  189.5, 137.1, 135.9, 135.1, 134.4, 134.3, 130.7, 129.8, 129.6, 129.1, 128.9, 128.8, 127.8, 68.2. **HRMS** (+ESI-TOF):  $m/z$   $[\text{M} + \text{H}]^+$  calcd for  $\text{C}_{20}\text{H}_{17}\text{O}_3\text{SSe}$ : 417.0058; found: 417.0057.

### 2-((4-(tert-butyl)phenyl)sulfonyl)-1-phenyl-2-(phenylselanyl)ethan-1-one(3n)

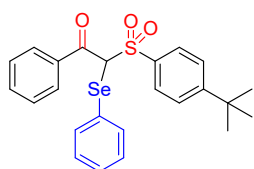

White solid, (91.5 mg, 94%), Mp: 120-121 °C;  $^1\text{H NMR}$  (600 MHz,  $\text{CDCl}_3$ )  $\delta$  7.97 (d,  $J = 8.4\text{ Hz}$ , 2H), 7.80 (d,  $J = 7.8\text{ Hz}$ , 2H), 7.59 (t,  $J = 7.2\text{ Hz}$ , 1H), 7.54 (dd,  $J = 13.2, 8.4\text{ Hz}$ , 4H), 7.43 (t,  $J = 7.8\text{ Hz}$ , 2H), 7.38 (t,  $J = 7.8\text{ Hz}$ , 1H), 7.27 (t,  $J = 7.2\text{ Hz}$ , 2H), 5.80 (s, 1H), 1.36 (s, 9H).  $^{13}\text{C NMR}$  (151 MHz,  $\text{CDCl}_3$ )  $\delta$  189.7, 158.4, 135.8, 135.3, 134.2, 134.1, 130.0, 129.7, 129.7, 129.0, 128.9, 127.9, 125.8, 68.4, 35.43, 31.2. **HRMS** (+ESI-TOF):  $m/z$   $[\text{M} + \text{H}]^+$  calcd for  $\text{C}_{24}\text{H}_{25}\text{O}_3\text{SSe}$ : 473.0684; found: 473.0684.

**2-(naphthalen-2-ylsulfonyl)-1-phenyl-2-(phenylselanyl)ethan-1-one(3o)**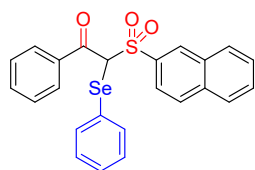

White solid, (92.4 mg, 96%), Mp: 125-126 °C;  $^1\text{H NMR}$  (600 MHz,  $\text{CDCl}_3$ )  $\delta$  8.61 (s, 1H), 7.99 (d,  $J = 9.0$  Hz, 2H), 7.93 (d,  $J = 9.0$  Hz, 1H), 7.90 (d,  $J = 8.4$  Hz, 1H), 7.79 (d,  $J = 7.2$  Hz, 2H), 7.67 (t,  $J = 7.8$  Hz, 1H), 7.61 (t,  $J = 8.4$  Hz, 1H), 7.55 (t,  $J = 7.2$  Hz, 3H), 7.39 (t,  $J = 7.8$  Hz, 2H), 7.33 (t,  $J = 7.2$  Hz, 1H), 7.22 (t,  $J = 7.8$  Hz, 2H), 5.89 (s, 1H).  $^{13}\text{C NMR}$  (151 MHz,  $\text{CDCl}_3$ )  $\delta$  189.5, 135.8, 135.7, 135.1, 134.4, 134.2, 132.9, 131.9, 129.8, 129.7, 129.6, 129.5, 129.0, 128.9, 128.8, 128.0, 127.8, 127.6, 124.9, 68.5. **HRMS** (+ESI-TOF):  $m/z$   $[\text{M} + \text{H}]^+$  calcd for  $\text{C}_{29}\text{H}_{19}\text{O}_3\text{SSe}$ : 467.0215; found: 467.0214.

**2-((4-chlorophenyl)sulfonyl)-1-phenyl-2-(phenylselanyl)ethan-1-one (3p)**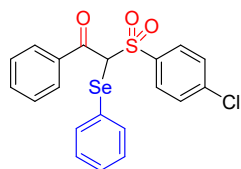

White solid, (85.0 mg, 94%), Mp: 108-110 °C;  $^1\text{H NMR}$  (600 MHz,  $\text{CDCl}_3$ )  $\delta$  7.98 (d,  $J = 8.4$  Hz, 2H), 7.80 (dd,  $J = 8.4, 1.2$  Hz, 2H), 7.59 (dd,  $J = 16.2, 7.8$  Hz, 3H), 7.51 (d,  $J = 8.4$  Hz, 2H), 7.44 (t,  $J = 8.4$  Hz, 2H), 7.39 (t,  $J = 7.8$  Hz, 1H), 7.30 (t,  $J = 7.8$  Hz, 2H), 5.82 (s, 1H).  $^{13}\text{C NMR}$  (151 MHz,  $\text{CDCl}_3$ )  $\delta$  189.5, 141.3, 135.8, 135.4, 135.0, 134.5, 132.3, 130.0, 129.7, 129.0, 127.6, 68.1. **HRMS** (+ESI-TOF):  $m/z$   $[\text{M} + \text{H}]^+$  calcd for  $\text{C}_{20}\text{H}_{16}\text{ClO}_3\text{SSe}$ : 450.9668; found: 450.9666.

**2-((4-nitrophenyl)sulfonyl)-1-phenyl-2-(phenylselanyl)ethan-1-one (3q)**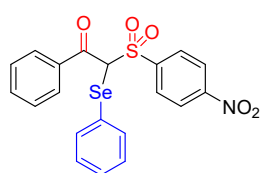

White solid, (87.1 mg, 94%), Mp: 154-155 °C;  $^1\text{H NMR}$  (600 MHz,  $\text{CDCl}_3$ )  $\delta$  8.37 (d,  $J = 8.4$  Hz, 2H), 8.27 (d,  $J = 8.4$  Hz, 2H), 7.80 (d,  $J = 7.2$  Hz, 2H), 7.61 (d,  $J = 7.8$  Hz, 3H), 7.45 (t,  $J = 7.2$  Hz, 2H), 7.41 (t,  $J = 7.2$  Hz, 1H), 7.32 (t,  $J = 7.8$  Hz, 2H), 5.89 (s, 1H).  $^{13}\text{C NMR}$  (151 MHz,  $\text{CDCl}_3$ )  $\delta$  189.3, 151.2, 142.6, 135.9, 134.8, 134.7, 132.4, 130.3, 129.8, 129.1, 129.0, 127.3, 123.7, 67.9. **HRMS** (+ESI-TOF):  $m/z$   $[\text{M} + \text{H}]^+$  calcd for  $\text{C}_{21}\text{H}_{19}\text{O}_5\text{SSe}$ : 477.0144; found: 477.0173.

**1-phenyl-2-(phenylselanyl)-2-(pyridin-3-ylsulfonyl)ethan-1-one(3r)**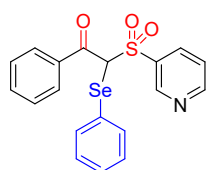

Yellow solid, (78.6 mg, 94%), Mp: 140-141 °C;  $^1\text{H NMR}$  (600 MHz,  $\text{CDCl}_3$ )  $\delta$  9.26 (d,  $J = 1.8$  Hz, 1H), 8.86 (dd,  $J = 4.8, 1.8$  Hz, 1H), 8.36 – 8.34 (m, 1H), 7.81 (d,  $J = 7.2$  Hz, 2H), 7.61 (t,  $J = 7.8$  Hz,

1H), 7.59 (dd,  $J = 8.4, 1.2$  Hz, 2H), 7.50 (dd,  $J = 7.8, 4.8$  Hz, 1H), 7.45 (t,  $J = 7.8$  Hz, 2H), 7.40 (t,  $J = 7.2$  Hz, 1H), 7.30 (t,  $J = 7.8$  Hz, 2H), 5.86 (s, 1H).  $^{13}\text{C}$  NMR (151 MHz,  $\text{CDCl}_3$ )  $\delta$  189.5, 154.6, 151.5, 139.0, 135.9, 134.8, 134.6, 133.6, 130.1, 129.8, 129.1, 129.0, 127.4, 123.4, 67.9. **HRMS** (+ESI-TOF):  $m/z$   $[\text{M} + \text{H}]^+$  calcd for  $\text{C}_{19}\text{H}_{16}\text{O}_3\text{SSe}$ : 418.0011; found: 418.0001.

### 1-phenyl-2-(phenylselanyl)-2-(thiophen-2-ylsulfonyl)ethan-1-one (3s)

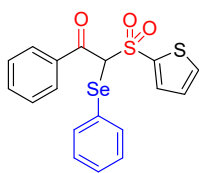

White solid, (83.1 mg, 98%), Mp: 160-161 °C;  $^1\text{H}$  NMR (600 MHz,  $\text{CDCl}_3$ )  $\delta$  7.85 – 7.76 (m, 4H), 7.59 (d,  $J = 7.8$  Hz, 3H), 7.43 (t,  $J = 7.8$  Hz, 2H), 7.39 (t,  $J = 7.2$  Hz, 1H), 7.29 (t,  $J = 7.2$  Hz, 2H), 7.14 (t,  $J = 4.2$  Hz, 2H), 5.87 (s, 1H).  $^{13}\text{C}$  NMR (151 MHz,  $\text{CDCl}_3$ )  $\delta$  189.4, 137.5, 136.0, 135.8, 135.0, 134.4, 130.0, 129.6, 129.0, 127.7, 127.6, 68.6. **HRMS** (+ESI-TOF):  $m/z$   $[\text{M} + \text{H}]^+$  calcd for  $\text{C}_{18}\text{H}_{15}\text{O}_3\text{SSe}$ : 422.9622; found: 422.9612.

### 2-(methylsulfonyl)-1-phenyl-2-(phenylselanyl)ethan-1-one (3t)

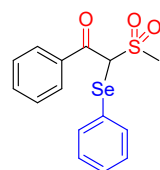

White solid, (69.8 mg, 98%), Mp: 126-127 °C;  $^1\text{H}$  NMR (600 MHz,  $\text{CDCl}_3$ )  $\delta$  7.88 (dd,  $J = 8.4, 1.2$  Hz, 2H), 7.73 (dd,  $J = 8.4, 1.2$  Hz, 2H), 7.64 (t,  $J = 7.8$  Hz, 1H), 7.48 (t,  $J = 7.8$  Hz, 2H), 7.43 (t,  $J = 7.8$  Hz, 1H), 7.35 (t,  $J = 7.8$  Hz, 2H), 5.60 (s, 1H), 3.35 (s, 3H).  $^{13}\text{C}$  NMR (151 MHz,  $\text{CDCl}_3$ )  $\delta$  190.6, 136.0, 134.8, 134.7, 130.2, 129.8, 129.1, 127.4, 65.6, 38.8. **HRMS** (+ESI-TOF):  $m/z$   $[\text{M} + \text{H}]^+$  calcd for  $\text{C}_{15}\text{H}_{15}\text{O}_3\text{SSe}$ : 354.9902; found: 354.9894.

### 2-(cyclopropylsulfonyl)-1-phenyl-2-(phenylselanyl)ethan-1-one (3u)

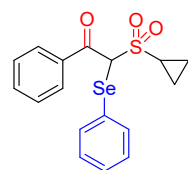

White solid, (72.1 mg, 95%), Mp: 106-107 °C;  $^1\text{H}$  NMR (600 MHz,  $\text{CDCl}_3$ )  $\delta$  7.87 (dd,  $J = 8.4, 1.2$  Hz, 2H), 7.70 (dd,  $J = 8.4, 1.2$  Hz, 2H), 7.62 (t,  $J = 7.8$  Hz, 1H), 7.46 (t,  $J = 8.4$  Hz, 2H), 7.40 (t,  $J = 7.2$  Hz, 1H), 7.32 (t,  $J = 7.8$  Hz, 2H), 5.69 (s, 1H), 2.98 – 2.94 (m, 1H), 1.50 – 1.45 (m, 1H), 1.30 – 1.26 (m, 1H), 1.18 – 1.14 (m, 1H), 1.07–1.2 (m, 1H).  $^{13}\text{C}$  NMR (151 MHz,  $\text{CDCl}_3$ )  $\delta$  190.2, 135.9, 135.0, 134.4, 129.9, 129.7, 129.1, 129.0, 127.8, 66.3, 29.0, 6.9, 5.1. **HRMS** (+ESI-TOF):  $m/z$   $[\text{M} + \text{H}]^+$  calcd for  $\text{C}_{17}\text{H}_{17}\text{O}_3\text{SSe}$ : 381.0058; found: 381.0058.

### 2-(benzylsulfonyl)-1-phenyl-2-(phenylselanyl)ethan-1-one (3v)

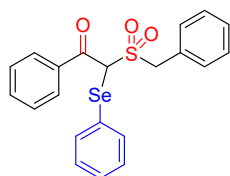

White solid, (82.6 mg, 96%), Mp: 108-109 °C;  $^1\text{H NMR}$  (600 MHz,  $\text{CDCl}_3$ )  $\delta$  7.72 (d,  $J = 7.2$  Hz, 2H), 7.66 (d,  $J = 7.2$  Hz, 2H), 7.61 (t,  $J = 7.8$  Hz, 1H), 7.44 – 7.38 (m, 5H), 7.35 (t,  $J = 7.8$  Hz, 1H), 7.32 – 7.29 (m, 4H), 5.54 (s, 1H), 4.83 (d,  $J = 13.2$  Hz, 1H), 4.67 (d,  $J = 13.2$  Hz, 1H).  $^{13}\text{C NMR}$  (151 MHz,  $\text{CDCl}_3$ )  $\delta$  190.2, 136.3, 134.8, 134.5, 131.5, 130.1, 129.7, 129.2, 129.1, 129.0, 128.9, 127.1, 126.8, 64.5, 57.6. **HRMS** (+ESI-TOF):  $m/z$   $[\text{M} + \text{H}]^+$  calcd for  $\text{C}_{21}\text{H}_{19}\text{O}_3\text{SSe}$ : 431.0215; found: 431.0216.

#### 1-phenyl-2-(p-tolylselanyl)-2-tosylethan-1-one (4a)

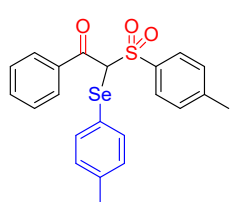

White solid, (79.1 mg, 89%), Mp: 145-147 °C;  $^1\text{H NMR}$  (600 MHz,  $\text{CDCl}_3$ )  $\delta$  7.90 (d,  $J = 8.4$  Hz, 2H), 7.79 (d,  $J = 7.2$  Hz, 2H), 7.57 (t,  $J = 7.2$  Hz, 1H), 7.45 (d,  $J = 7.8$  Hz, 2H), 7.41 (t,  $J = 7.8$  Hz, 2H), 7.32 (d,  $J = 7.8$  Hz, 2H), 7.08 (d,  $J = 7.8$  Hz, 2H), 5.73 (s, 1H), 2.43 (s, 3H), 2.39 (s, 3H).  $^{13}\text{C NMR}$  (151 MHz,  $\text{CDCl}_3$ )  $\delta$  189.7, 145.5, 140.2, 136.1, 135.2, 134.2, 134.1, 130.7, 130.4, 129.4, 129.0, 128.9, 124.3, 68.4, 21.8, 21.34. **HRMS** (+ESI-TOF):  $m/z$   $[\text{M} + \text{H}]^+$  calcd for  $\text{C}_{22}\text{H}_{21}\text{O}_3\text{SSe}$ : 445.0371; found: 445.0373.

#### 2-(naphthalen-2-ylselanyl)-1-phenyl-2-tosylethan-1-one (4b)

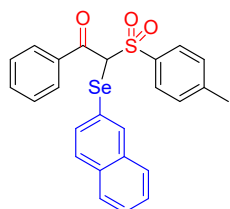

Colorless oil, (79.3 mg, 83%) ;  $^1\text{H NMR}$  (600 MHz,  $\text{CDCl}_3$ )  $\delta$  7.99 (s, 1H), 7.93 (d,  $J = 8.4$  Hz, 2H), 7.82 (d,  $J = 7.2$  Hz, 1H), 7.80 (d,  $J = 7.2$  Hz, 2H), 7.74 (d,  $J = 9$  Hz, 1H), 7.71 (d,  $J = 9.0$  Hz, 1H), 7.62 (dd,  $J = 8.4, 1.8$  Hz, 1H), 7.57 (t,  $J = 7.2$  Hz, 1H), 7.54-7.50 (m, 2H), 7.40 (t,  $J = 7.2$  Hz, 2H), 7.31 (d,  $J = 8.4$  Hz, 2H), 5.86 (s, 1H), 2.42 (s, 3H).  $^{13}\text{C NMR}$  (151 MHz,  $\text{CDCl}_3$ )  $\delta$  189.7, 145.6, 135.8, 135.2, 134.2, 134.1, 133.7, 133.4, 131.8, 130.7, 129.5, 129.2, 129.1, 128.0, 127.9, 127.4, 126.9, 125.2, 68.4, 21.8. **HRMS** (+ESI-TOF):  $m/z$   $[\text{M} + \text{H}]^+$  calcd for  $\text{C}_{25}\text{H}_{21}\text{O}_3\text{SSe}$ : 481.0371; found: 481.0367.

#### 2-(benzo[d][1,3]dioxol-5-ylselanyl)-1-phenyl-2-tosylethan-1-one (4c)

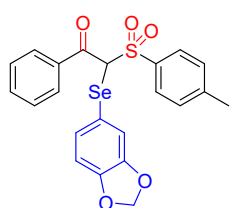

White solid, (75.9 mg, 80%), Mp: 120-121 °C;  $^1\text{H NMR}$  (600 MHz,  $\text{CDCl}_3$ )  $\delta$  7.90 (d,  $J = 7.8$  Hz, 2H), 7.80 (d,  $J = 7.8$  Hz, 2H), 7.58 (t,  $J = 7.2$  Hz, 1H), 7.43 (t,  $J = 7.8$  Hz, 2H), 7.32 (d,  $J = 8.4$  Hz, 2H), 7.03 – 7.00 (m, 2H), 6.68 (d,  $J = 7.8$  Hz, 2H), 5.98 (s, 2H), 5.71 (s, 1H), 2.44 (s, 3H).  $^{13}\text{C NMR}$  (151 MHz,  $\text{CDCl}_3$ )  $\delta$  189.6, 149.5, 148.3, 145.6,

135.3, 134.2, 134.1, 131.1, 130.7, 129.5, 129.0, 128.9, 118.9, 116.5, 109.2, 101.7, 68.6, 21.8. **HRMS** (+ESI-TOF):  $m/z$   $[M + H]^+$  calcd for  $C_{22}H_{19}O_5SSe$ : 475.0113; found: 475.0113.

#### 2-([1,1'-biphenyl]-4-ylselanyl)-1-phenyl-2-tosylethan-1-one (4d)

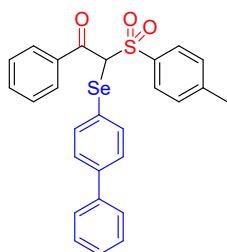

White solid, (94.1 mg, 93%), Mp: 141-142 °C;  **$^1H$  NMR** (600 MHz,  $CDCl_3$ )  $\delta$  7.92 (d,  $J = 8.4$  Hz, 2H), 7.83 (d,  $J = 8.4$  Hz, 2H), 7.66 (d,  $J = 7.2$  Hz, 2H), 7.60 – 7.57 (m, 3H), 7.50 (d,  $J = 8.4$  Hz, 2H), 7.47 – 7.42 (m, 4H), 7.39 (t,  $J = 8.4$  Hz, 1H), 7.33 (d,  $J = 7.8$  Hz, 2H), 5.82 (s, 1H), 2.44 (s, 3H).  **$^{13}C$  NMR** (151 MHz,  $CDCl_3$ )  $\delta$  189.7, 145.6, 142.7, 140.0, 136.3, 135.2, 134.3, 134.1, 130.7, 129.5, 129.1, 129.0, 128.9, 128.2, 128.1, 127.2, 126.8, 68.5, 21.9. **HRMS** (+ESI-TOF):  $m/z$   $[M + H]^+$  calcd for  $C_{27}H_{23}O_3SSe$ : 507.0528; found: 507.0526.

#### 2-(mesitylselanyl)-1-phenyl-2-tosylethan-1-one (4e)

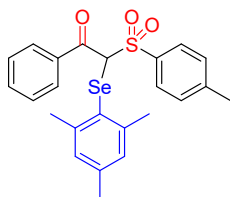

White solid, (57.2 mg, 61%), Mp: 125-126 °C;  **$^1H$  NMR** (600 MHz,  $CDCl_3$ )  $\delta$  7.83 (d,  $J = 7.8$  Hz, 2H), 7.73 (d,  $J = 7.2$  Hz, 2H), 7.55 (t,  $J = 7.2$  Hz, 1H), 7.36 (t,  $J = 7.8$  Hz, 2H), 7.29 (d,  $J = 8.4$  Hz, 2H), 6.89 (s, 2H), 5.50 (s, 1H), 2.42 (s, 3H), 2.38 (s, 6H), 2.26 (s, 3H).  **$^{13}C$  NMR** (151 MHz,  $CDCl_3$ )  $\delta$  191.2, 145.5, 144.0, 140.4, 135.5, 134.2, 134.1, 130.3, 129.5, 129.2, 129.1, 128.8, 127.1, 68.0, 24.5, 21.8, 21.2. **HRMS** (+ESI-TOF):  $m/z$   $[M + H]^+$  calcd for  $C_{24}H_{25}O_3SSe$ : 473.0684; found: 473.0685.

#### 2-((4-fluorophenyl)selanyl)-1-phenyl-2-tosylethan-1-one (4f)

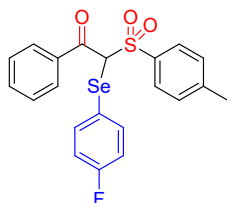

White solid, (109.8 mg, 93%), Mp: 121-122 °C;  **$^1H$  NMR** (600 MHz,  $CDCl_3$ )  $\delta$  7.88 (d,  $J = 7.8$  Hz, 2H), 7.78 (dd,  $J = 8.4, 1.2$  Hz, 2H), 7.60 – 7.55 (m, 3H), 7.42 (t,  $J = 8.4$  Hz, 2H), 7.32 (d,  $J = 7.8$  Hz, 2H), 6.96 (t,  $J = 8.4$  Hz, 2H), 5.75 (s, 1H), 2.43 (s, 3H).  **$^{13}C$  NMR** (151 MHz,  $CDCl_3$ )  $\delta$  189.4, 164.8 (d,  $J_{C-F} = 249.6$  Hz), 145.6, 138.7 (d,  $J_{C-F} = 8.52$  Hz), 135.2, 134.3, 134.0, 130.6, 129.5, 129.0, 128.9, 122.3 (d,  $J_{C-F} = 3.3$  Hz), 116.9 (d,  $J_{C-F} = 21.6$  Hz), 68.2, 21.9. **HRMS** (+ESI-TOF):  $m/z$   $[M + H]^+$  calcd for  $C_{21}H_{18}FO_3SSe$ : 449.0120; found: 449.0111.

**2-((4-bromophenyl)selanyl)-1-phenyl-2-tosylethan-1-one (4g)**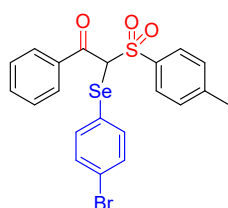

White solid, (88.0 mg, 87%), Mp: 138-139 °C;  $^1\text{H NMR}$  (600 MHz,  $\text{CDCl}_3$ )  $\delta$  7.87 (d,  $J = 8.4$  Hz, 2H), 7.79 (d,  $J = 7.2$  Hz, 2H), 7.59 (t,  $J = 7.2$  Hz, 2H), 7.42 (dt,  $J = 25.2, 8.4$  Hz, 6H), 7.31 (d,  $J = 8.4$  Hz, 2H), 5.77 (s, 1H), 2.43 (s, 3H).  $^{13}\text{C NMR}$  (151 MHz,  $\text{CDCl}_3$ )  $\delta$  189.4, 145.7, 137.6, 135.1, 134.4, 133.9, 132.7, 130.6, 129.5, 129.1, 129.0, 126.4, 124.8, 68.2, 21.9. **HRMS** (+ESI-TOF):  $m/z$   $[\text{M} + \text{H}]^+$  calcd for  $\text{C}_{21}\text{H}_{18}\text{BrO}_3\text{SSe}$ : 508.9320; found: 508.9318.

**2-((4-iodophenyl)selanyl)-1-phenyl-2-tosylethan-1-one (4h)**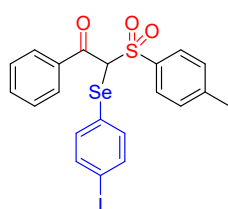

White solid, (94.5 mg, 85%), Mp: 152-154 °C;  $^1\text{H NMR}$  (600 MHz,  $\text{CDCl}_3$ )  $\delta$  7.86 (d,  $J = 7.8$  Hz, 2H), 7.79 (dd,  $J = 8.4, 0.6$  Hz, 2H), 7.59 (t,  $J = 7.8$  Hz, 3H), 7.43 (dd,  $J = 8.1, 7.8$  Hz, 2H), 7.31 (d,  $J = 8.4$  Hz, 4H), 5.77 (s, 1H), 2.43 (s, 3H).  $^{13}\text{C NMR}$  (151 MHz,  $\text{CDCl}_3$ )  $\delta$  189.4, 145.7, 138.7, 137.5, 135.1, 134.4, 133.9, 130.6, 129.5, 129.1, 129.0, 127.4, 96.6, 68.2, 21.87. **HRMS** (+ESI-TOF):  $m/z$   $[\text{M} + \text{H}]^+$  calcd for  $\text{C}_{21}\text{H}_{18}\text{IO}_3\text{SSe}$ : 556.9181; found: 556.9179.

**2-((4-chlorophenyl)selanyl)-1-phenyl-2-tosylethan-1-one (4i)**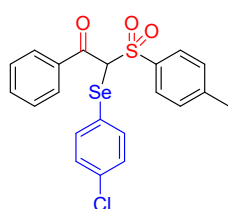

White solid, (81.8 mg, 88%), Mp: 119-121 °C;  $^1\text{H NMR}$  (600 MHz,  $\text{CDCl}_3$ )  $\delta$  7.87 (d,  $J = 8.4$  Hz, 2H), 7.79 (d,  $J = 7.8$  Hz, 2H), 7.59 (t,  $J = 7.2$  Hz, 1H), 7.52 (d,  $J = 8.4$  Hz, 2H), 7.43 (t,  $J = 7.8$  Hz, 2H), 7.31 (d,  $J = 7.8$  Hz, 2H), 7.24 (d,  $J = 8.4$  Hz, 2H), 5.76 (s, 1H), 2.43 (s, 3H).  $^{13}\text{C NMR}$  (151 MHz,  $\text{CDCl}_3$ ) 189.4, 145.7, 137.4, 136.5, 135.1, 134.4, 133.9, 130.6, 129.8, 129.5, 129.0, 128.9, 125.7, 68.2, 21.9. **HRMS** (+ESI-TOF):  $m/z$   $[\text{M} + \text{H}]^+$  calcd for  $\text{C}_{21}\text{H}_{18}\text{ClO}_3\text{SSe}$ : 462.9833; found: 462.9829.

**2-((3-chlorophenyl)selanyl)-1-phenyl-2-tosylethan-1-one (4j)**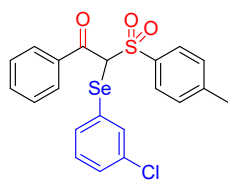

White solid, (80.3 mg, 87%), Mp: 103-104 °C;  $^1\text{H NMR}$  (600 MHz,  $\text{CDCl}_3$ )  $\delta$  7.89 (d,  $J = 7.8$  Hz, 2H), 7.82 (d,  $J = 7.8$  Hz, 2H), 7.60 (t,  $J = 7.2$  Hz, 1H), 7.45 (t,  $J = 7.2$  Hz, 3H), 7.37 – 7.32 (m, 4H), 7.20 (t,  $J = 7.8$  Hz, 1H), 5.80 (s, 1H), 2.45 (s, 3H).  $^{13}\text{C NMR}$  (151 MHz,  $\text{CDCl}_3$ )  $\delta$  189.4, 145.9, 135.3, 135.1, 134.9, 134.4, 133.8, 133.7, 130.7,



130.6, 130.0, 129.6, 129.1, 129.0, 128.9, 68.3, 21.9. **HRMS** (+ESI-TOF):  $m/z$  [M + H]<sup>+</sup> calcd for C<sub>21</sub>H<sub>18</sub>ClO<sub>3</sub>SSe: 464.9825; found: 464.9823.

#### 2-((2-chlorophenyl)selanyl)-1-phenyl-2-tosylethan-1-one (4k)

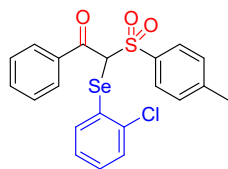

White solid, (78.6 mg, 85%), Mp: 100-102°C; <sup>1</sup>H NMR (600 MHz, CDCl<sub>3</sub>) δ 7.91 (d,  $J$  = 7.8 Hz, 2H), 7.81 (d,  $J$  = 8.4 Hz, 3H), 7.60 (t,  $J$  = 7.2 Hz, 1H), 7.45 (t,  $J$  = 8.4 Hz, 2H), 7.40 (dd,  $J$  = 8.4, 1.2 Hz, 1H), 7.31 – 7.26 (m, 3H), 7.22 (td,  $J$  = 9.0, 1.8 Hz, 1H), 6.06 (s, 1H), 2.43 (s, 3H). <sup>13</sup>C NMR (151 MHz, CDCl<sub>3</sub>) δ 190.2, 145.8, 137.7, 136.6, 135.3, 134.4, 133.4, 130.7, 130.6, 130.0, 129.5, 129.4, 128.9, 128.5, 127.9, 67.7, 21.9. **HRMS** (+ESI-TOF):  $m/z$  [M + H]<sup>+</sup> calcd for C<sub>21</sub>H<sub>18</sub>ClO<sub>3</sub>SSe: 464.9825; found: 464.9824.

#### 1-phenyl-2-tosyl-2-((4-(trifluoromethyl)phenyl)selanyl)ethan-1-one (4l)

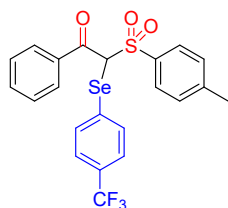

White solid, (82.6 mg, 83%), Mp: 123-124 °C; <sup>1</sup>H NMR (600 MHz, CDCl<sub>3</sub>) δ 7.85 (d,  $J$  = 8.4 Hz, 2H), 7.81 (dd,  $J$  = 7.8, 0.6 Hz, 2H), 7.74 (d,  $J$  = 7.8 Hz, 2H), 7.60 (t,  $J$  = 7.2 Hz, 1H), 7.52 (d,  $J$  = 7.8 Hz, 2H), 7.44 (t,  $J$  = 8.4 Hz, 2H), 7.31 (d,  $J$  = 7.8 Hz, 2H), 5.86 (s, 1H), 2.43 (s, 3H). <sup>13</sup>C NMR (151 MHz, CDCl<sub>3</sub>) δ 189.4, 145.9, 135.6, 135.0, 134.5, 133.6, 132.4, 131.7 (q,  $J_{C-F}$  = 32.6 Hz), 130.6, 129.6, 129.1, 129.0, 126.3 (q,  $J_{C-F}$  = 4.0 Hz), 124.8 (q,  $J_{C-F}$  = 270.9 Hz), 68.2, 21.8. **HRMS** (+ESI-TOF):  $m/z$  [M + H]<sup>+</sup> calcd for C<sub>22</sub>H<sub>18</sub>F<sub>3</sub>O<sub>3</sub>SSe: 499.0089; found: 499.0090.

#### 4-((2-oxo-2-phenyl-1-tosylethyl)selanyl)benzotrile (4m)

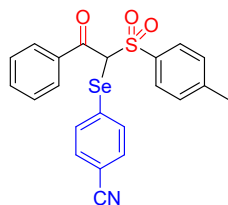

White solid, (79.6 mg, 87%), Mp: 156-157 °C; <sup>1</sup>H NMR (600 MHz, CDCl<sub>3</sub>) δ 7.84 – 7.80 (m, 4H), 7.75 (d,  $J$  = 8.4 Hz, 2H), 7.60 (t,  $J$  = 7.2 Hz, 1H), 7.55 (d,  $J$  = 8.4 Hz, 2H), 7.44 (t,  $J$  = 7.8 Hz, 2H), 7.31 (d,  $J$  = 8.4 Hz, 2H), 5.90 (s, 1H), 2.43 (s, 3H). <sup>13</sup>C NMR (151 MHz, CDCl<sub>3</sub>) δ 189.2, 146.0, 135.4, 134.9, 134.6, 134.1, 133.0, 132.7, 130.6, 129.6, 129.1, 129.0, 118.9, 113.1, 68.1, 21.9. **HRMS** (+ESI-TOF):  $m/z$  [M + H]<sup>+</sup> calcd for C<sub>22</sub>H<sub>18</sub>NO<sub>3</sub>SSe: 456.0167; found: 456.0164.

#### 2-(((3-nitrophenyl)selanyl)-1-phenyl-2-tosylethan-1-one (4n)

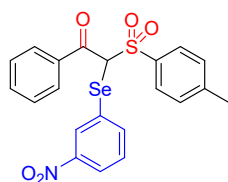

White solid, (87.4 mg, 89%), Mp: 147-149 °C;  $^1\text{H}$  NMR (600 MHz,  $\text{CDCl}_3$ )  $\delta$  8.26 (t,  $J = 1.8$  Hz, 1H), 8.20 (d,  $J = 8.4$  Hz, 1H), 7.98 (d,  $J = 7.2$  Hz, 1H), 7.84 (dd,  $J = 16.2, 8.4$  Hz, 4H), 7.62 (t,  $J = 7.8$  Hz, 1H), 7.49 – 7.44 (m, 3H), 7.32 (d,  $J = 7.8$  Hz, 2H), 5.90 (s, 1H), 2.43 (s, 3H).  $^{13}\text{C}$  NMR (151 MHz,  $\text{CDCl}_3$ )  $\delta$  189.1, 148.2, 146.1, 142.0, 134.9, 134.7, 133.5, 130.6, 130.4, 130.3, 130.0, 129.6, 129.1, 128.8, 124.6, 68.1, 21.9. HRMS (+ESI-TOF):  $m/z$   $[\text{M} + \text{H}]^+$  calcd for  $\text{C}_{21}\text{H}_{18}\text{NO}_5\text{SSe}$ : 476.0065; found: 476.0058.

### 2-(methylselanyl)-1-phenyl-2-tosylethan-1-one (4o)

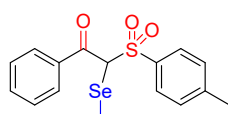

White solid, (55.3 mg, 75%), Mp: 118-119 °C;  $^1\text{H}$  NMR (600 MHz,  $\text{CDCl}_3$ )  $\delta$  7.91 – 7.89 (m, 4H), 7.59 (t,  $J = 7.8$  Hz, 1H), 7.45 (t,  $J = 7.8$  Hz, 2H), 7.32 (d,  $J = 8.4$  Hz, 2H), 5.63 (s, 1H), 2.43 (s, 3H), 2.16 (s, 3H).  $^{13}\text{C}$  NMR (151 MHz,  $\text{CDCl}_3$ )  $\delta$  188.8, 145.5, 135.1, 134.2, 134.1, 130.5, 129.5, 130.0, 128.8, 61.8, 21.9, 7.2. HRMS (+ESI-TOF):  $m/z$   $[\text{M} + \text{H}]^+$  calcd for  $\text{C}_{16}\text{H}_{17}\text{O}_3\text{SSe}$ : 369.0058; found: 369.0061.

### 2-(benzylselanyl)-1-phenyl-2-tosylethan-1-one (4p)

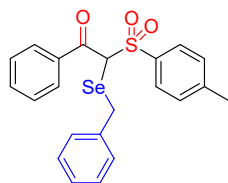

White solid, (69.0 mg, 78%), Mp: 127-128 °C;  $^1\text{H}$  NMR (600 MHz,  $\text{CDCl}_3$ )  $\delta$  7.90 (d,  $J = 8.4$  Hz, 2H), 7.48 (t,  $J = 7.2$  Hz, 1H), 7.39 - 7.36 (m, 7.1 Hz, 4H), 7.34 - 7.30 (m, 5H), 7.25 (t,  $J = 7.8$  Hz, 2H), 5.47 (s, 1H), 4.40 (d,  $J = 11.4$  Hz, 1H), 3.96 (d,  $J = 11.4$  Hz, 1H), 2.42 (s, 3H).  $^{13}\text{C}$  NMR (151 MHz,  $\text{CDCl}_3$ )  $\delta$  189.64, 145.5, 136.8, 134.8, 134.1, 134.0, 130.8, 130.0, 129.3, 129.1, 128.7, 128.6, 127.8, 61.8, 30.9, 21.9. HRMS (+ESI-TOF):  $m/z$   $[\text{M} + \text{H}]^+$  calcd for  $\text{C}_{22}\text{H}_{21}\text{O}_3\text{SSe}$ : 445.0371; found: 445.0369.

### 1-phenyl-2-(phenylthio)-2-tosylethan-1-one (4q)<sup>3</sup>

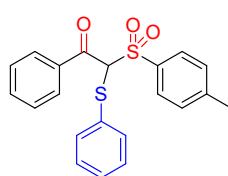

White solid, (72.6 mg, 95%), m.p.: 85-87 °C;  $^1\text{H}$  NMR (600 MHz,  $\text{CDCl}_3$ )  $\delta$  7.88 (t,  $J = 8.4$  Hz, 4H), 7.61 (t,  $J = 7.2$  Hz, 1H), 7.53 (d,  $J = 6.6$  Hz, 2H), 7.46 (t,  $J = 7.8$  Hz, 2H), 7.36 – 7.30 (m, 5H), 5.80 (s, 1H), 2.45 (s, 3H).  $^{13}\text{C}$  NMR (151 MHz,  $\text{CDCl}_3$ )  $\delta$  189.6, 145.8, 135.3, 134.4, 133.6, 133.3, 132.4, 130.9, 129.6, 126.5, 129.4, 129.3, 129.0, 77.4, 77.2, 77.0, 75.7, 21.9.

**3-(3,5-di-tert-butyl-4-hydroxyphenyl)-1-phenyl-2-tosylpropan-1-one (5a)**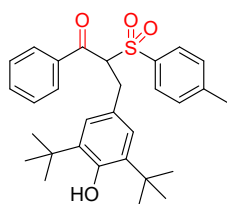

White solid, Mp: 166-167 °C;  $^1\text{H NMR}$  (600 MHz,  $\text{CDCl}_3$ )  $\delta$  7.74 (d,  $J = 8.4$  Hz, 2H), 7.68 (dd,  $J = 8.4, 0.6$  Hz, 2H), 7.48 (t,  $J = 7.2$  Hz, 1H), 7.35 – 7.32 (m, 4H), 6.78 (s, 2H), 5.28 (dd,  $J = 12.0, 3.0$  Hz, 1H), 4.98 (s, 1H), 3.43 (dd,  $J = 13.2, 3.0$  Hz, 1H), 3.24 (dd,  $J = 13.2, 12.0$  Hz, 1H), 2.45 (s, 3H), 1.25 (s, 18H).  $^{13}\text{C NMR}$  (151 MHz,  $\text{CDCl}_3$ )  $\delta$  193.5, 152.8, 145.5, 137.6, 136.3, 133.9, 133.7, 130.1, 129.7, 128.8, 128.6, 126.3, 125.4, 71.7, 34.8, 34.3, 30.2, 21.9. **HRMS** (+ESI-TOF):  $m/z$   $[\text{M} + \text{H}]^+$  calcd for  $\text{C}_{30}\text{H}_{36}\text{NaO}_4\text{S}$ : 515.2227; found: 515.2224.

**10. References**

1. N. C. Hsueh, H. Y. Chen and M. Y. Chang, *J Org Chem.*, 2017, **82**, 13324-13332.
2. Y. T. Ma, C. Lin, X. B. Huang, M. C. Liu, Y. B. Zhou and H. Y. Wu, *Chem Commun.*, 2022, **58**, 6550-6553.
3. R. J. Reddy, J. J. Kumar and A. H. Kumari, *Eur J Org Chem.*, 2019, **2019**, 3771-3775.

## 11. Spectra Data

### <sup>1</sup>H NMR of **3a**

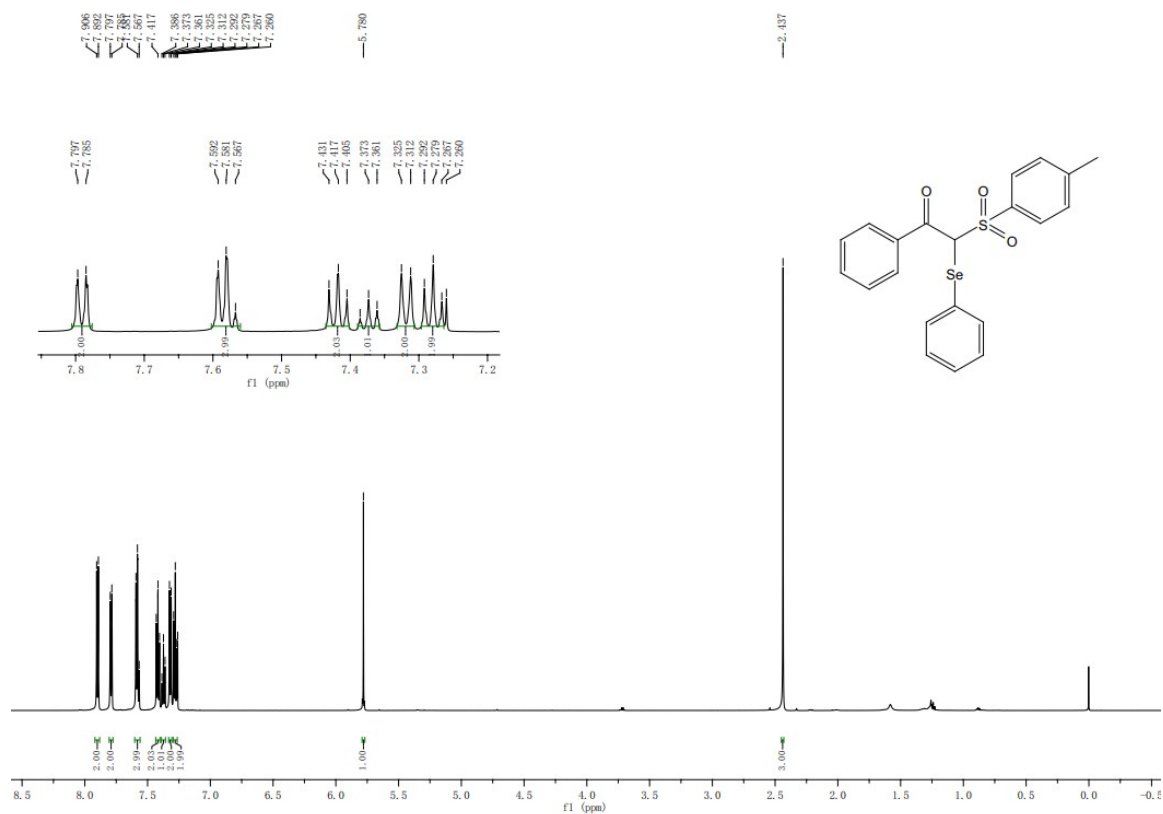

### <sup>13</sup>C NMR of **3a**

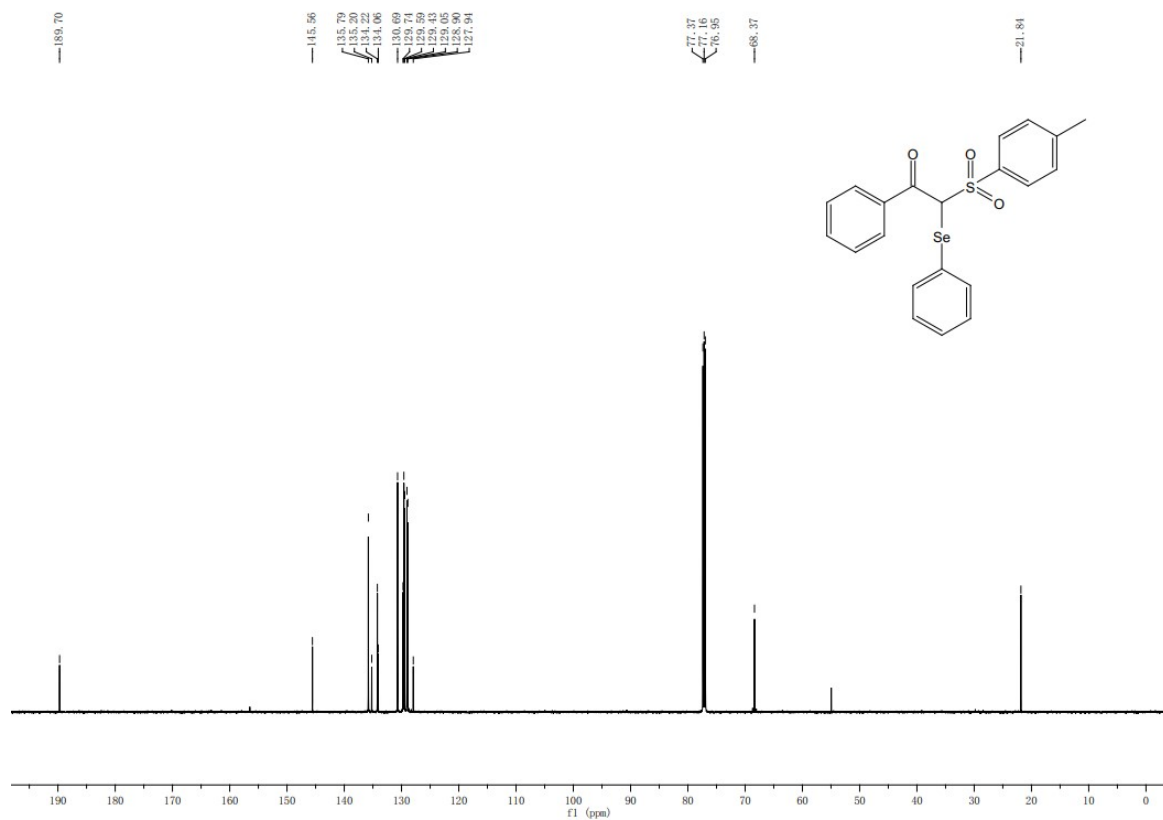

<sup>1</sup>H NMR of **3b**

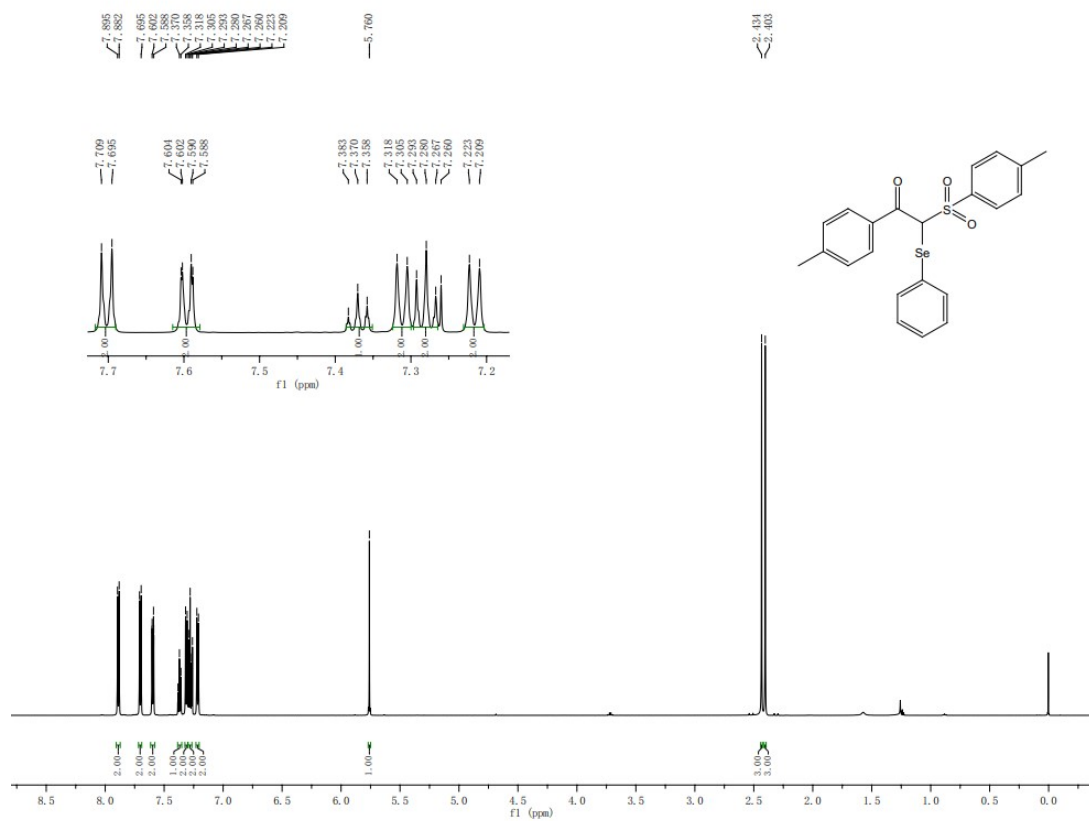

<sup>13</sup>C NMR of **3b**

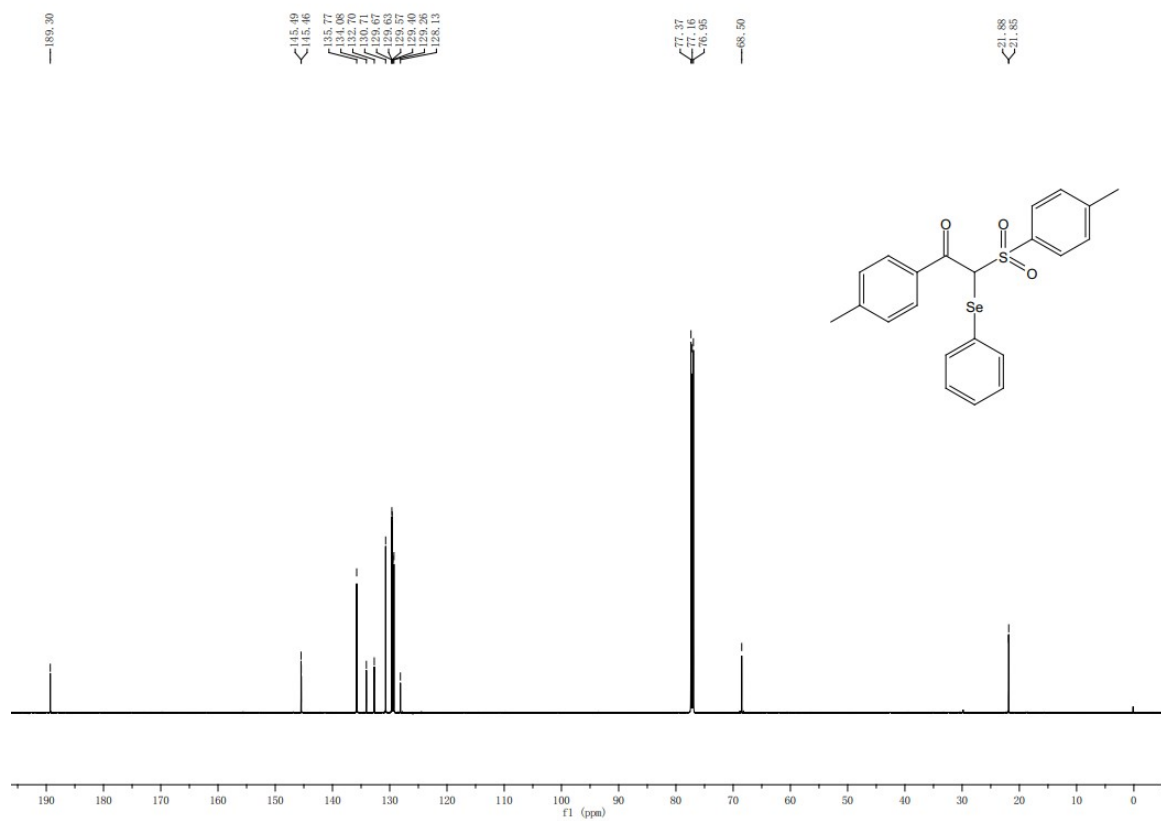

<sup>1</sup>H NMR of **3c**

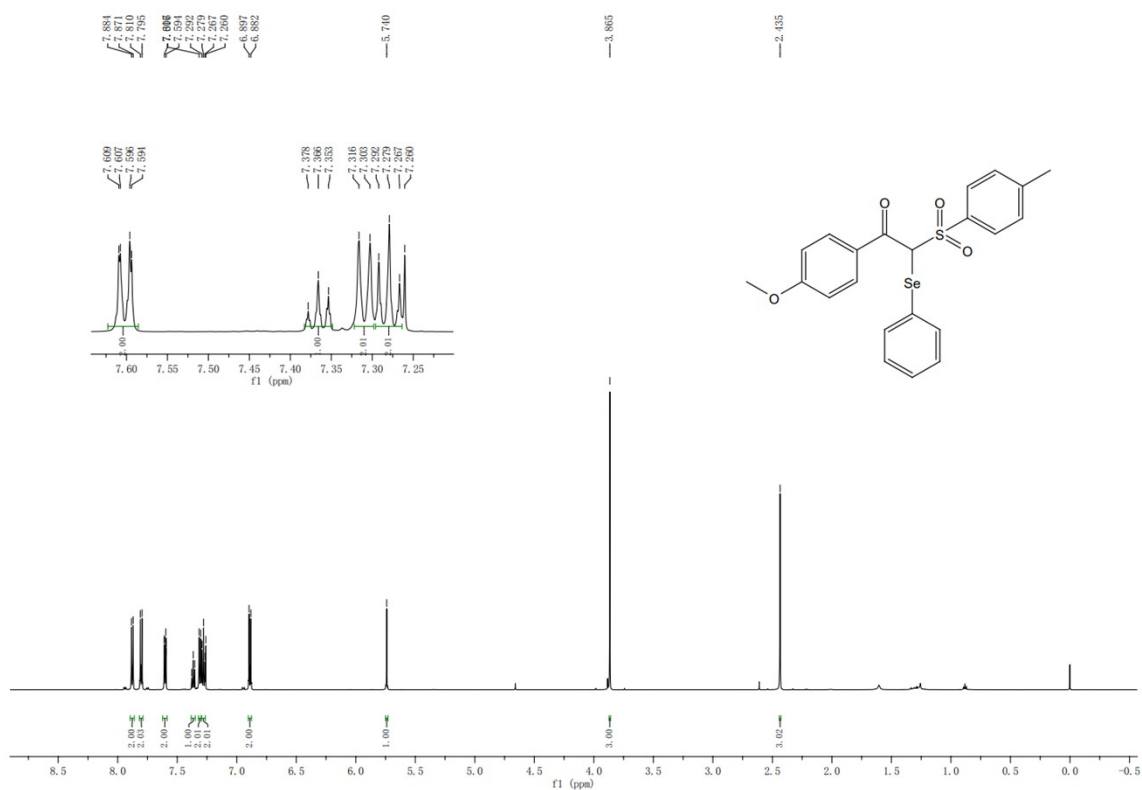

<sup>13</sup>C NMR of **3c**

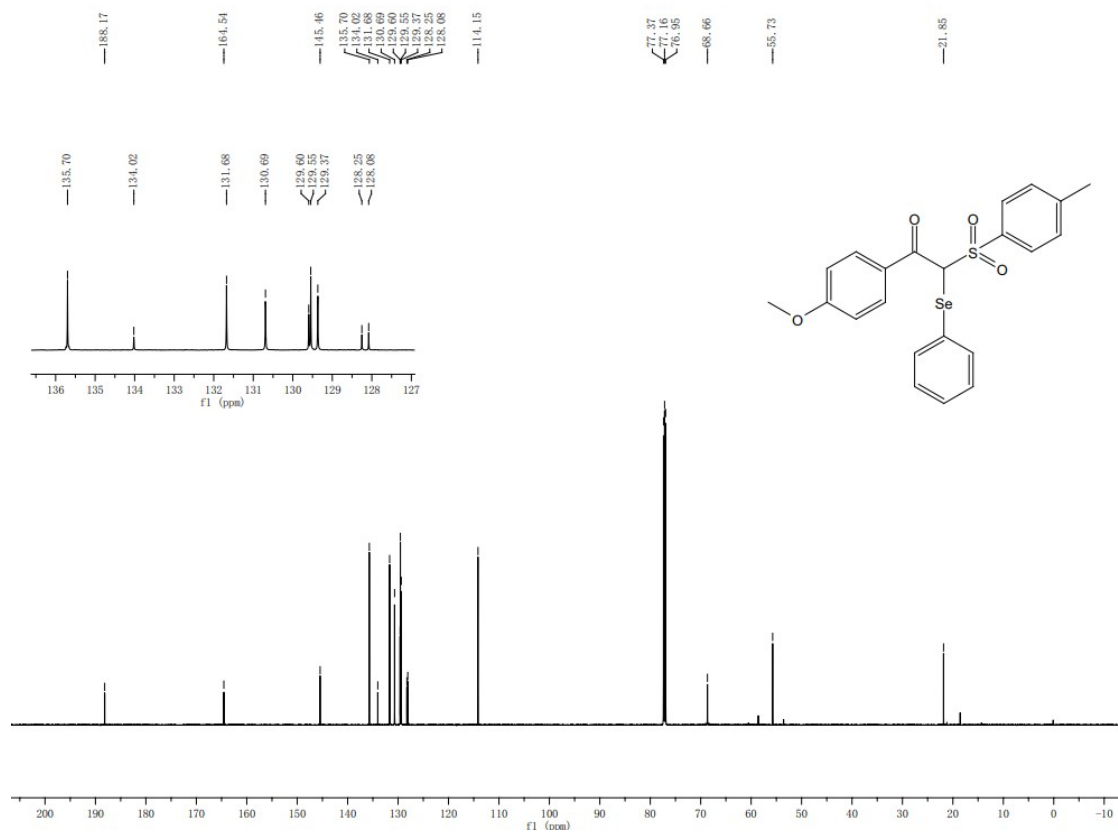

<sup>1</sup>H NMR of 3d

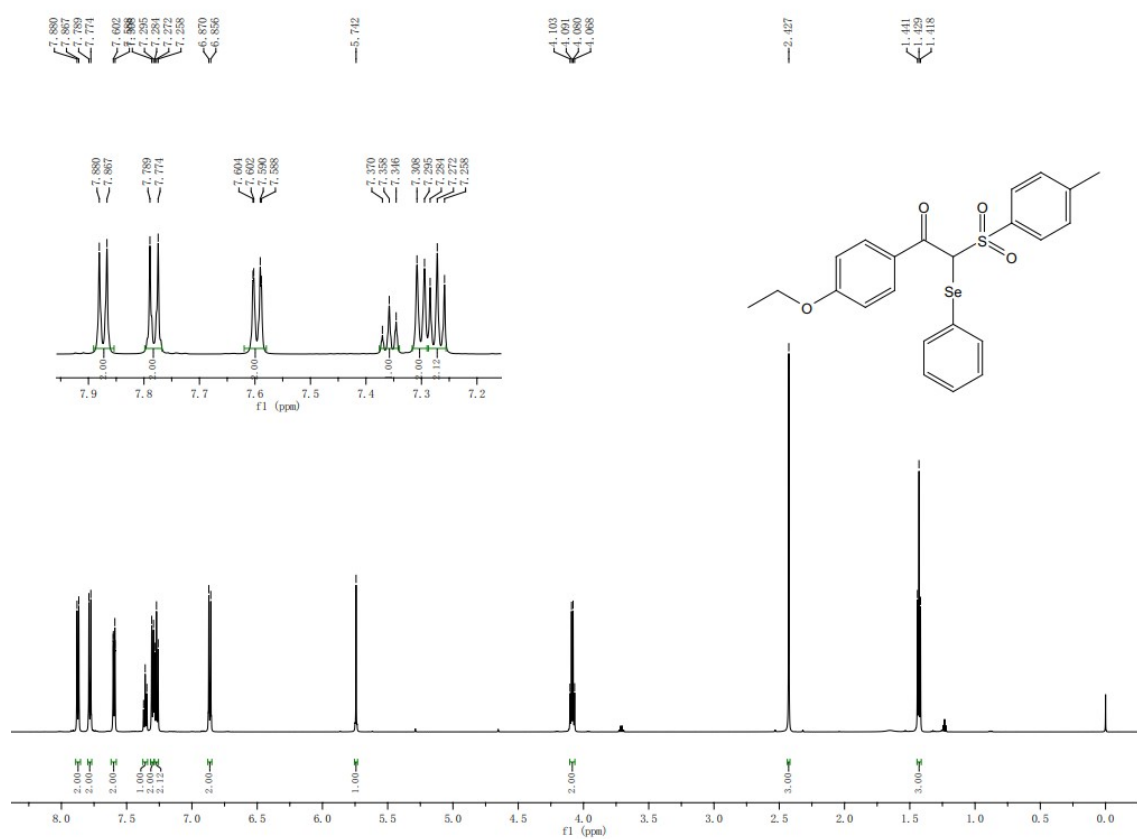

<sup>13</sup>C NMR of 3d

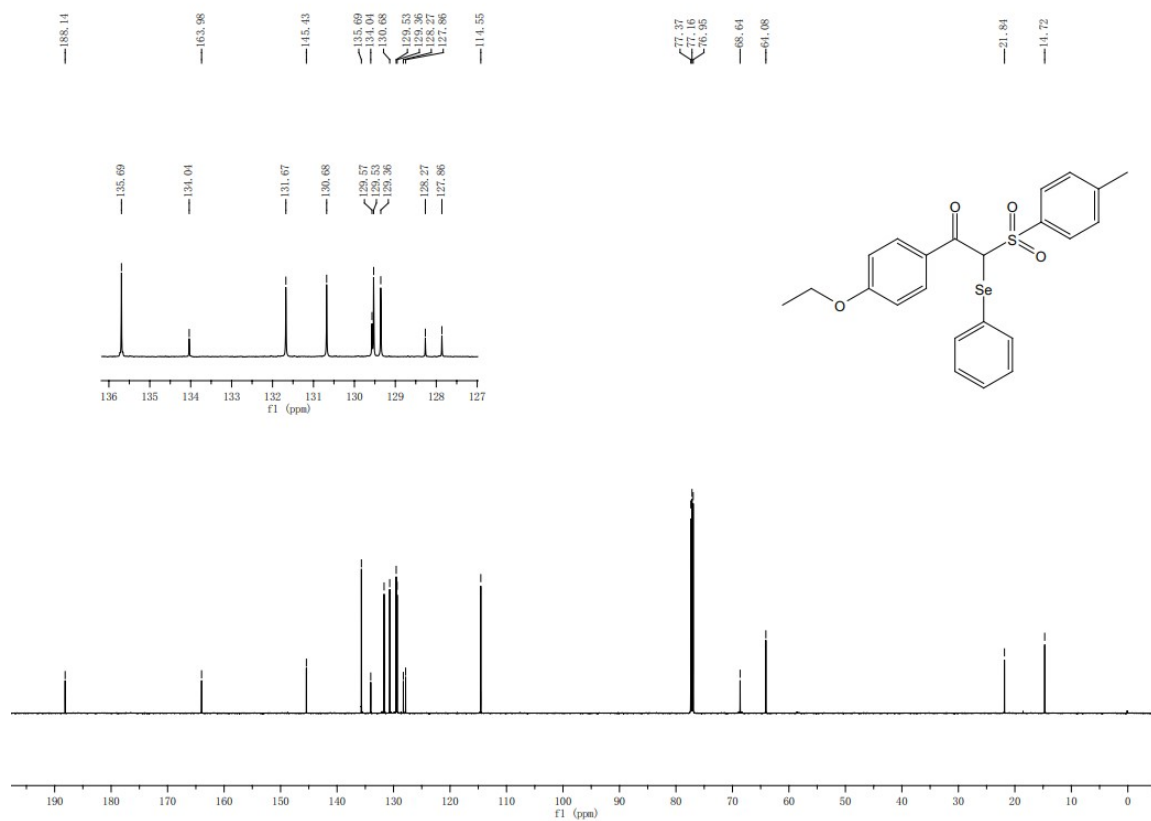

<sup>1</sup>H NMR of 3e

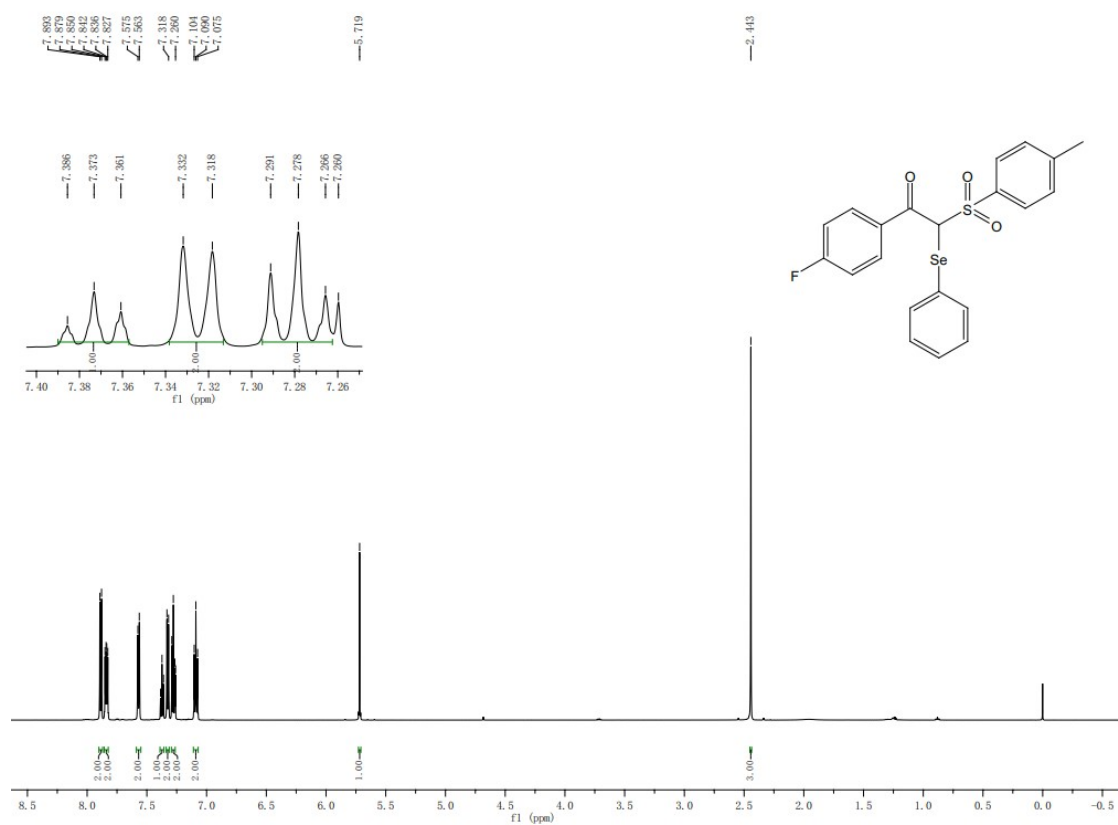

<sup>13</sup>C NMR of 3e

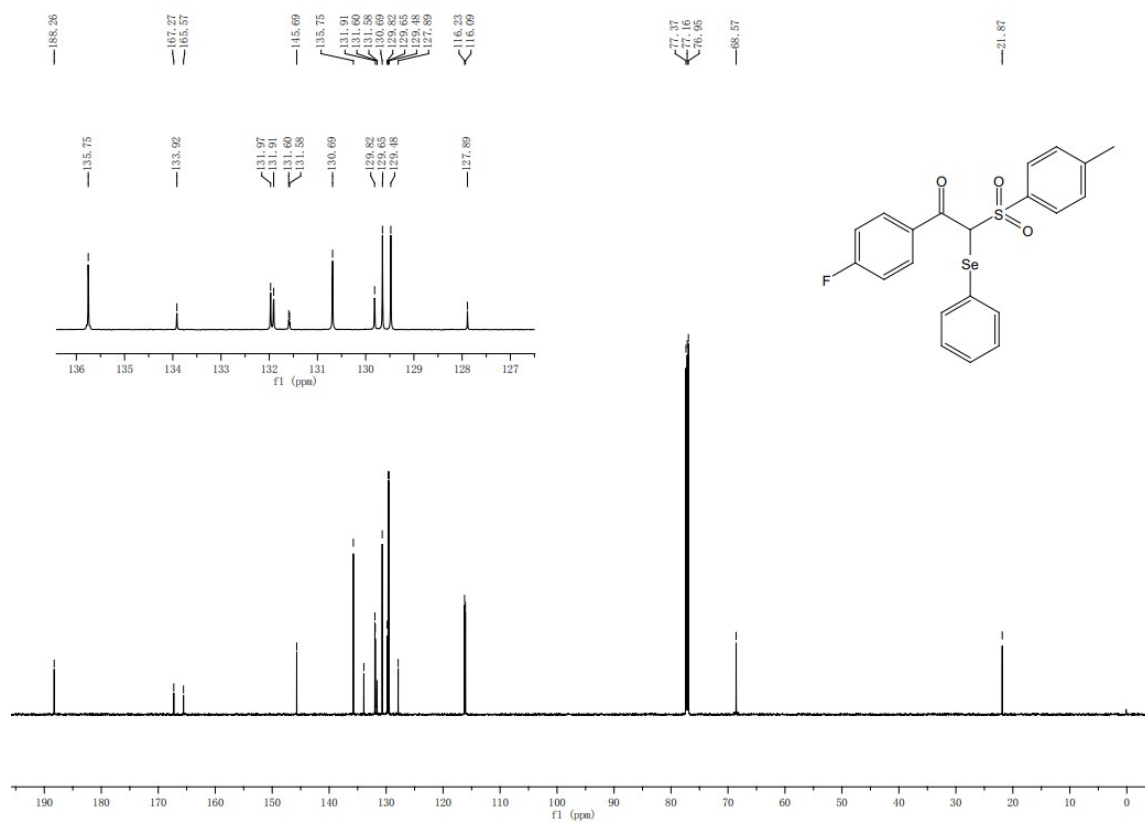



$^1\text{H}$  NMR of **3f**

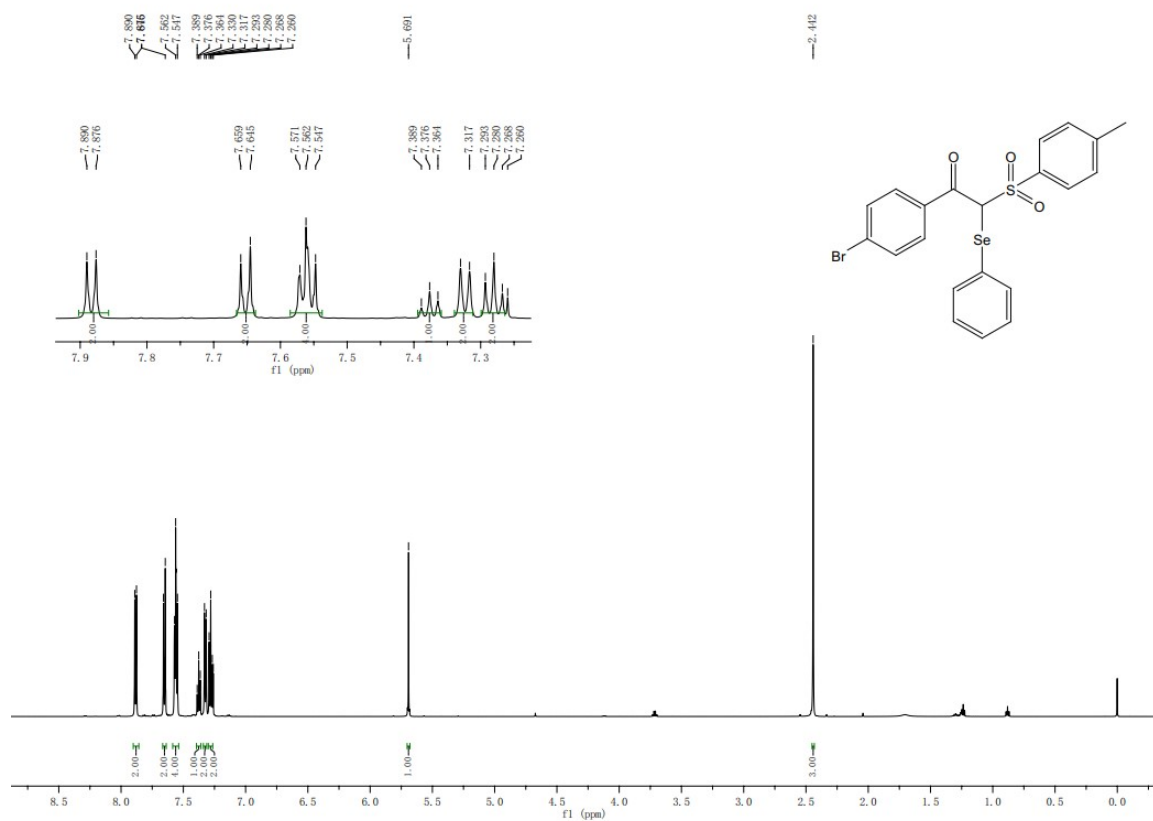

$^{13}\text{C}$  NMR of **3f**

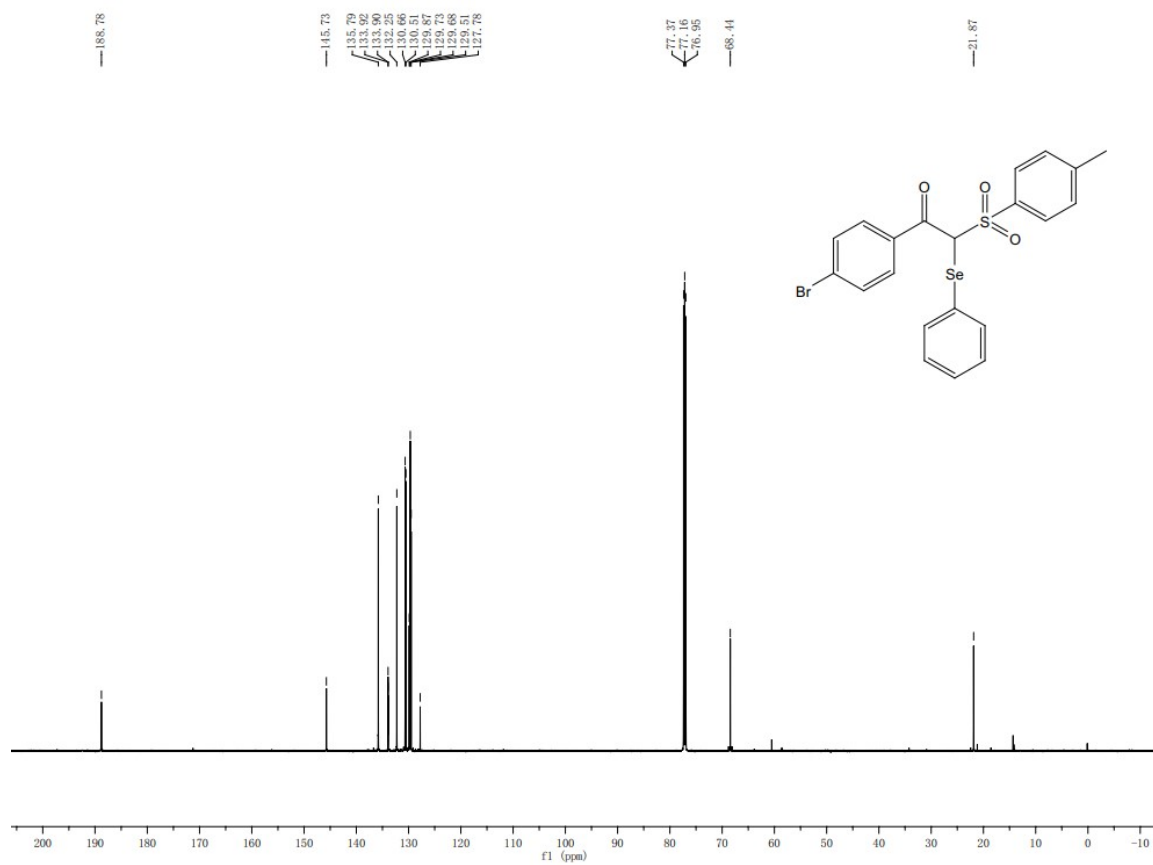

<sup>1</sup>H NMR of 3g

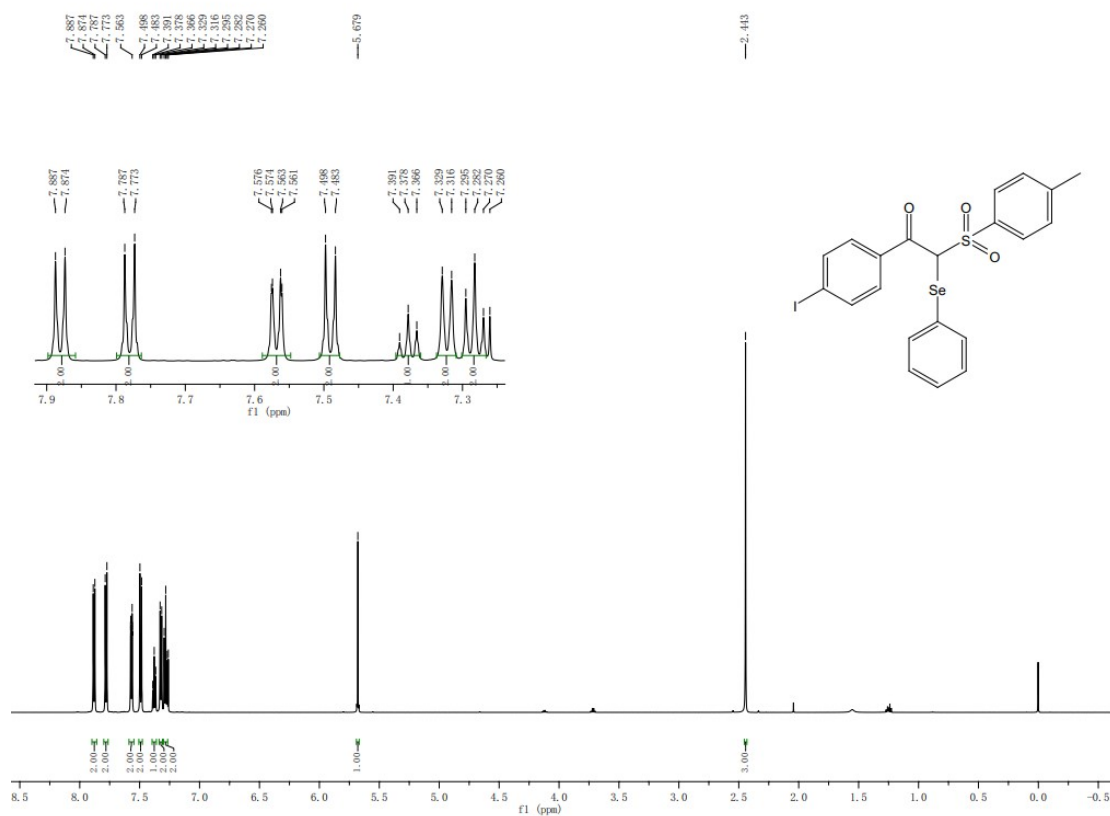

<sup>13</sup>C NMR of 3g

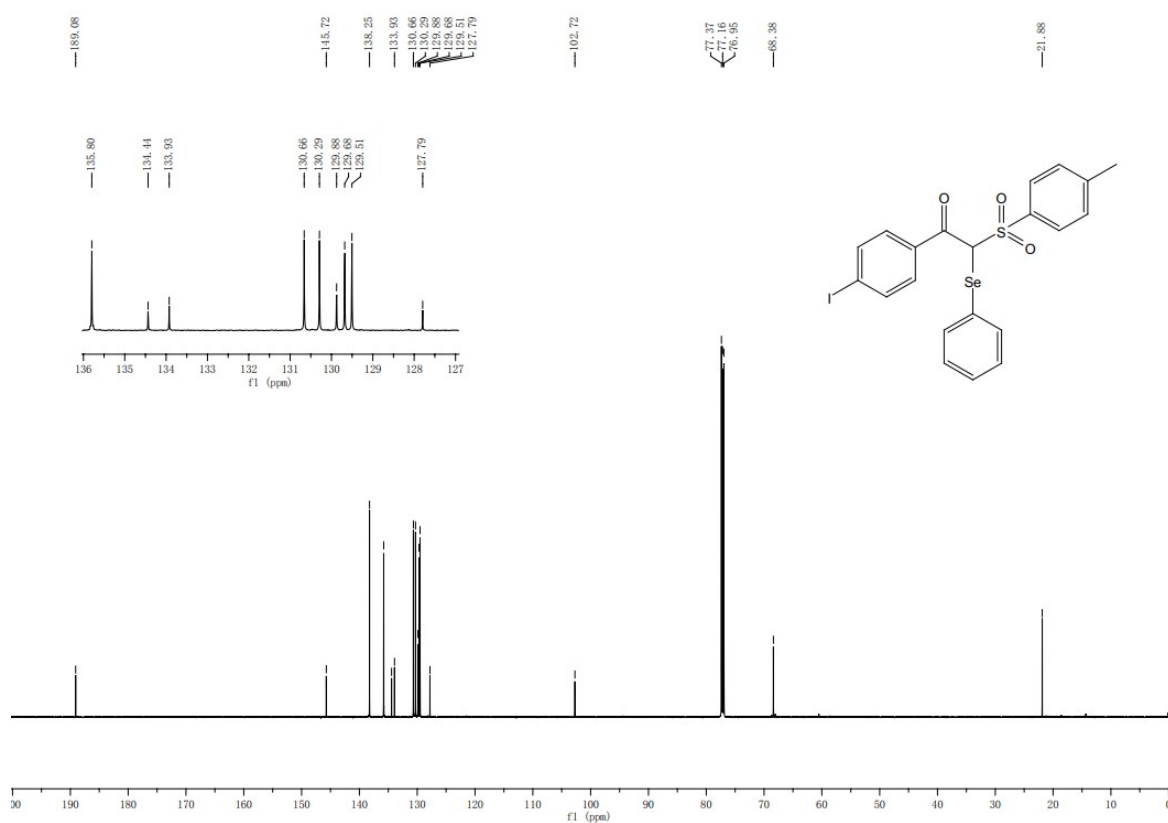

<sup>1</sup>H NMR of 3h

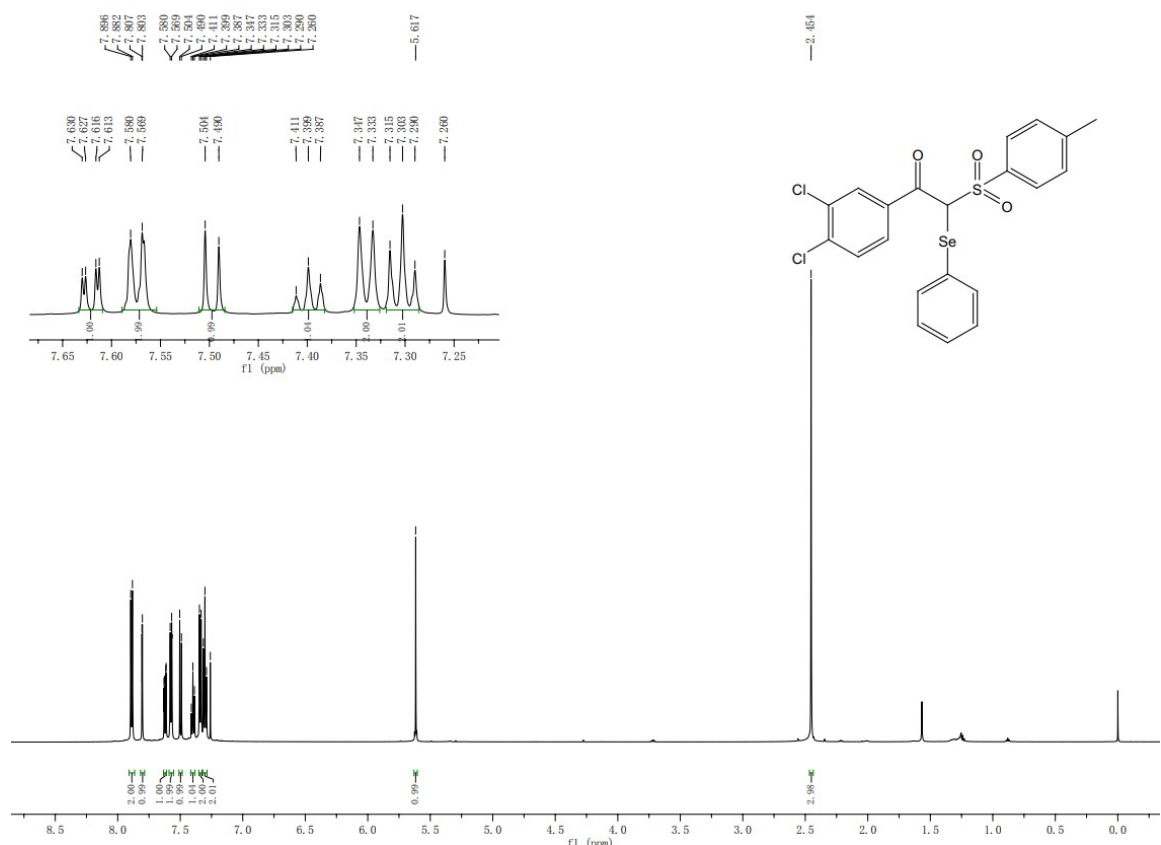

<sup>13</sup>C NMR of 3h

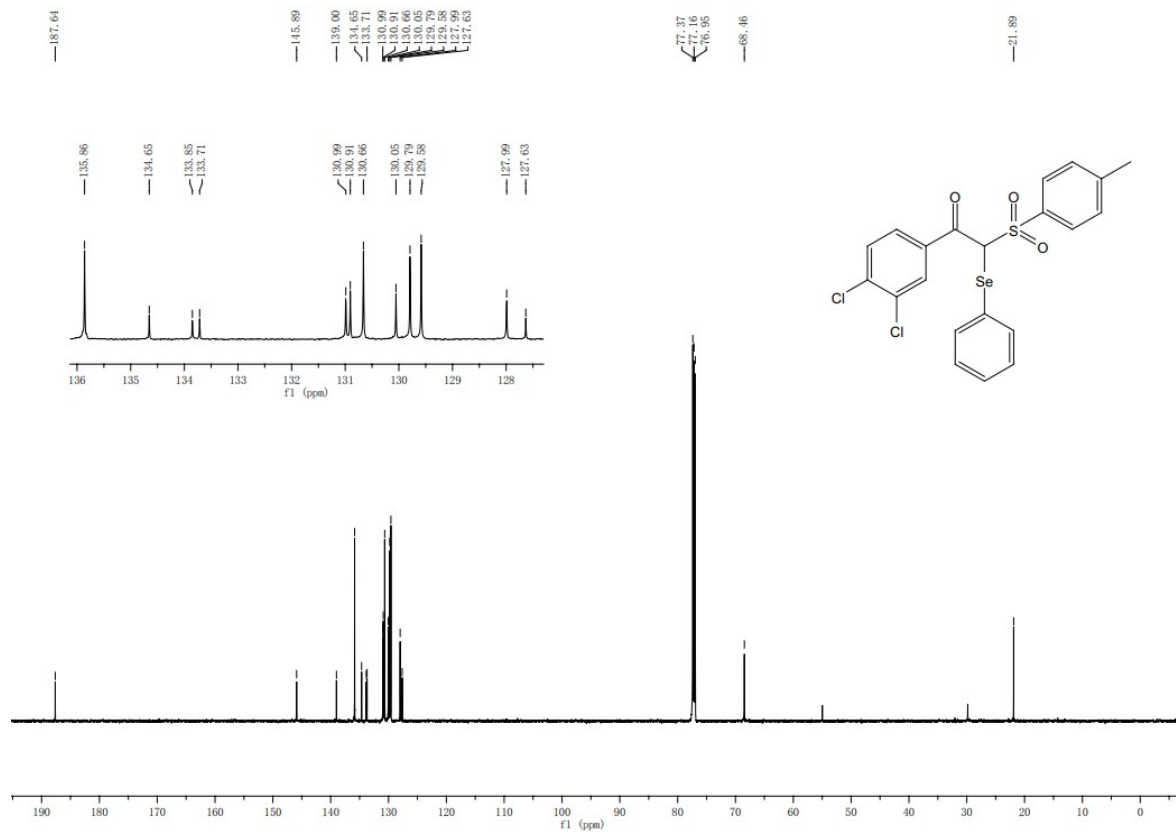

<sup>1</sup>H NMR of **3i**

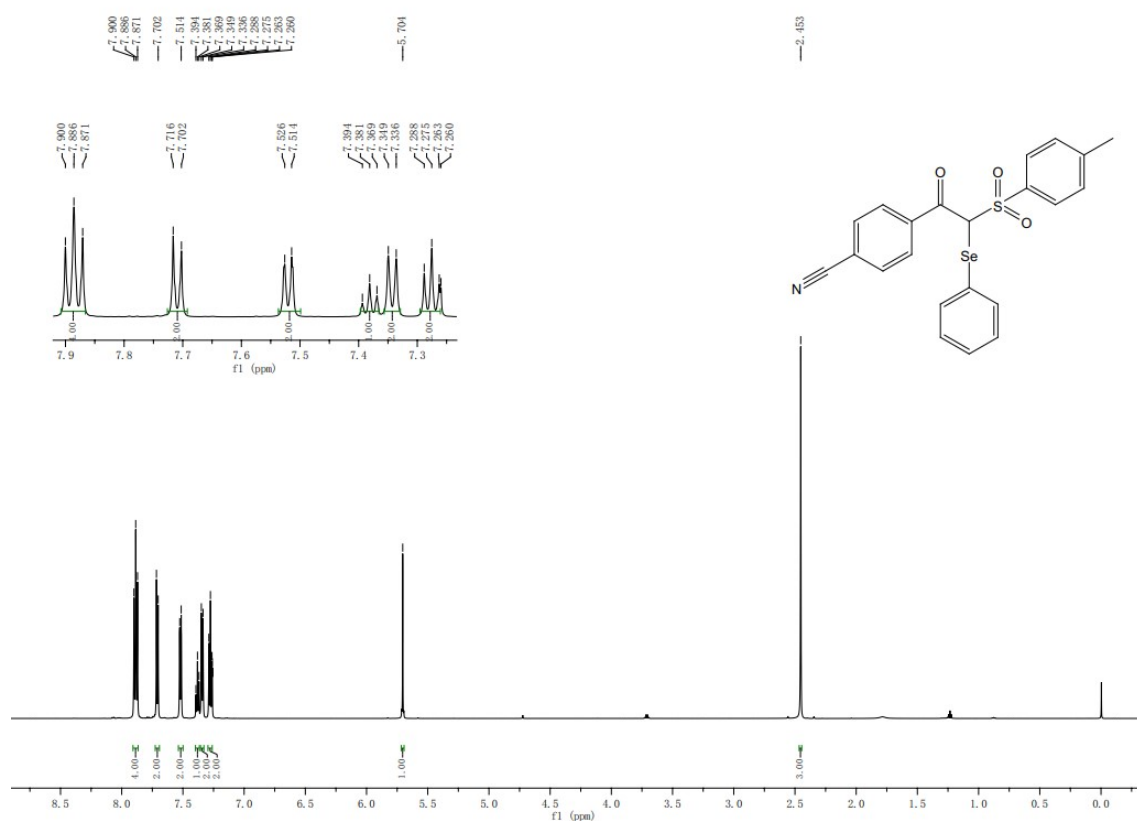

<sup>13</sup>C NMR of **3i**

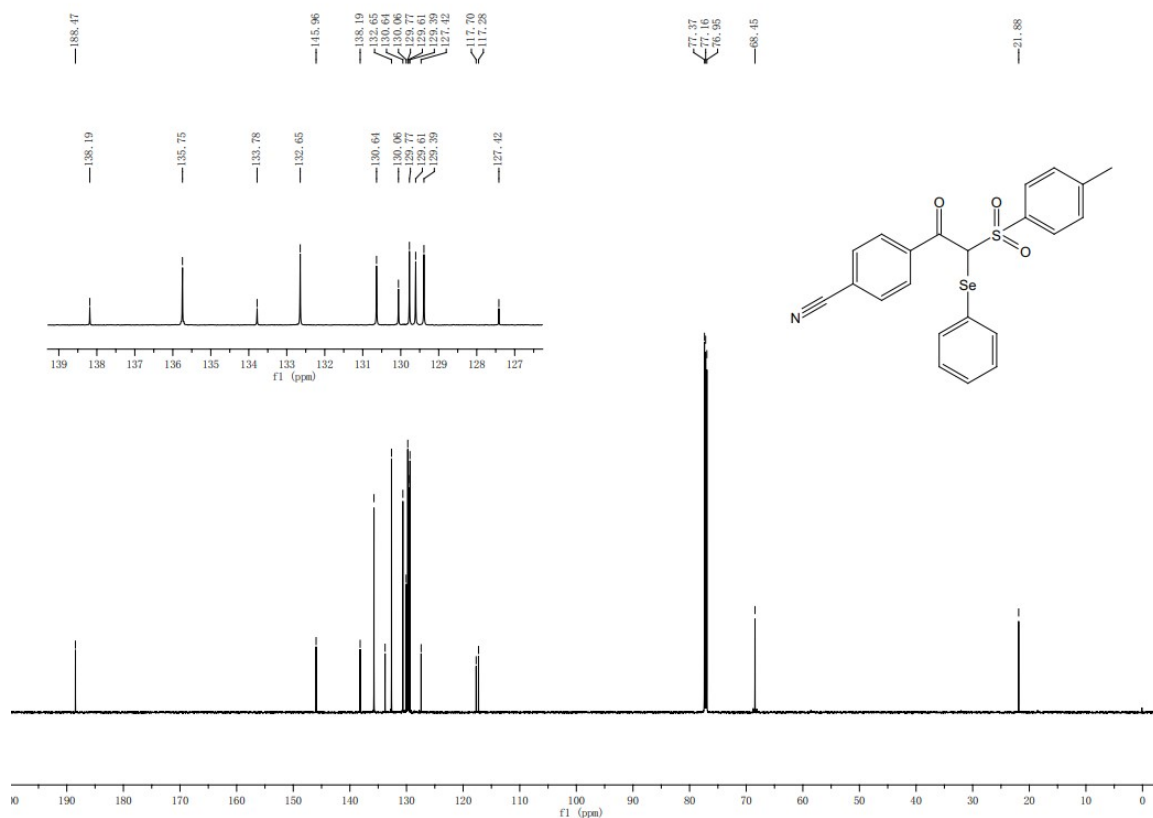

<sup>1</sup>H NMR of 3j

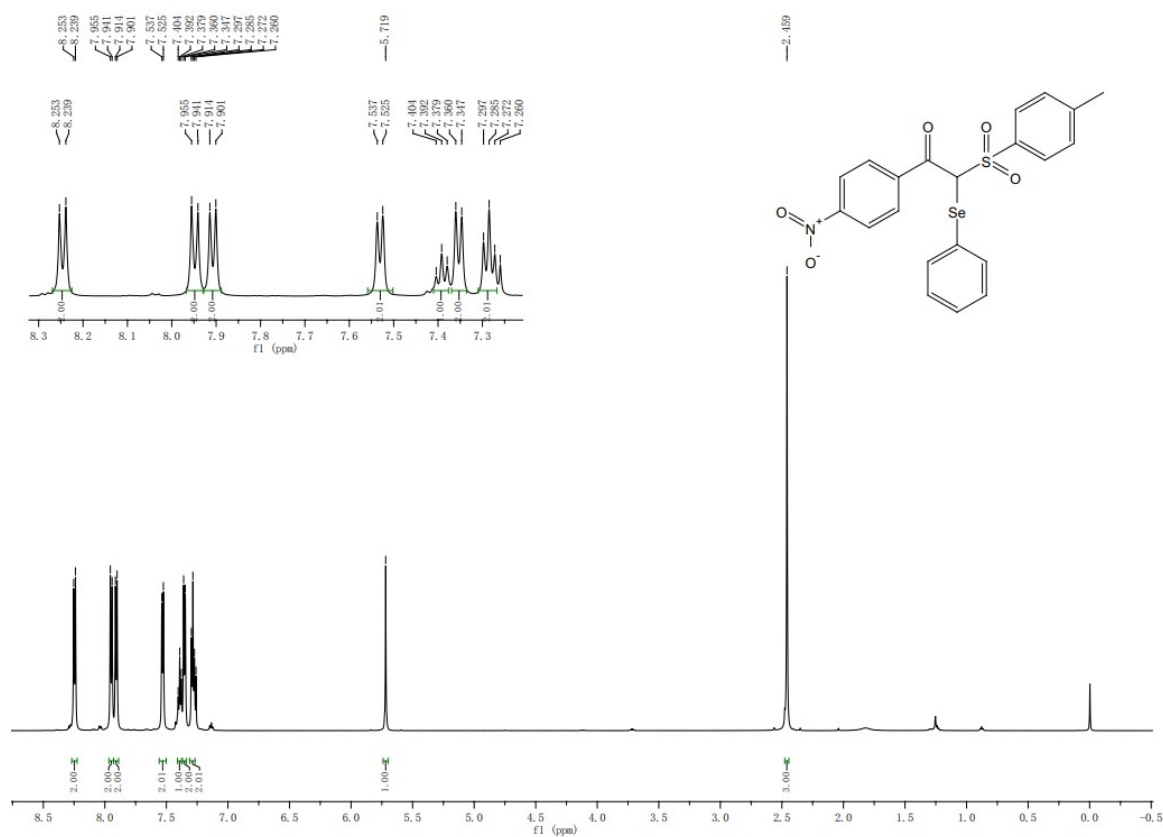

<sup>13</sup>C NMR of 3j

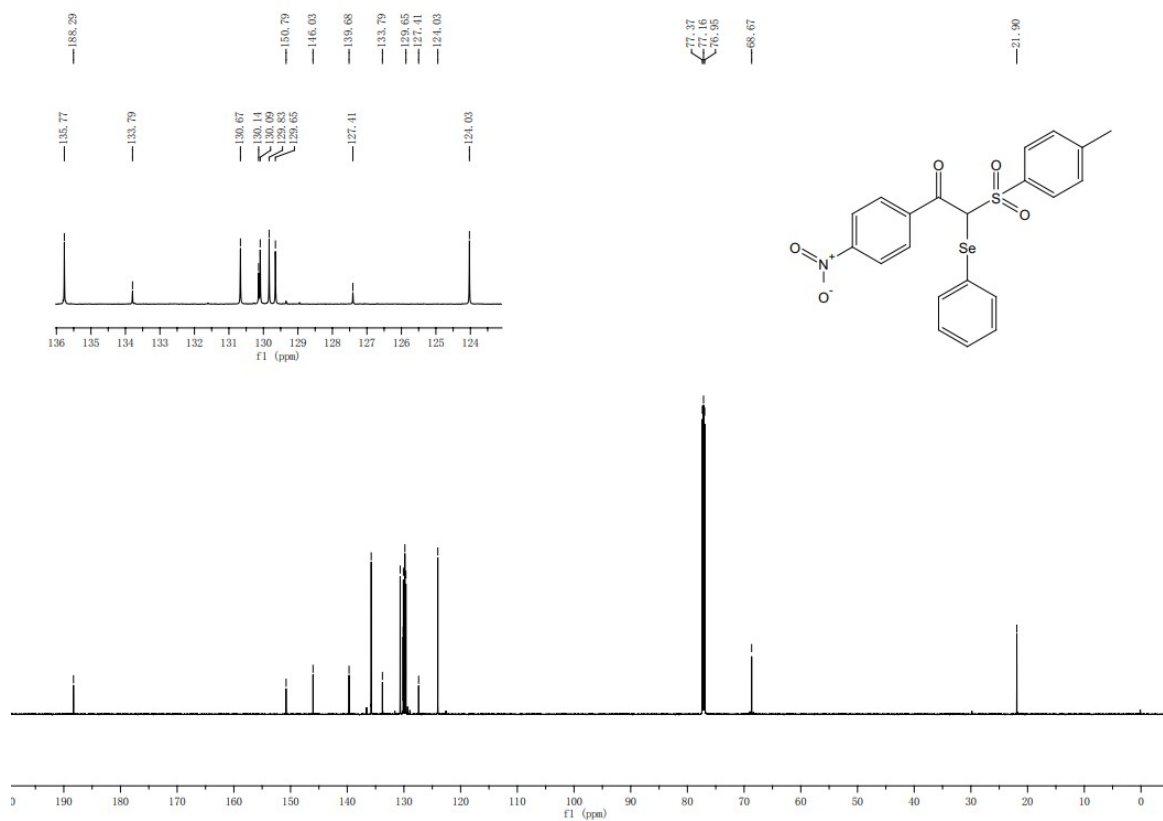

<sup>1</sup>H NMR of 3k

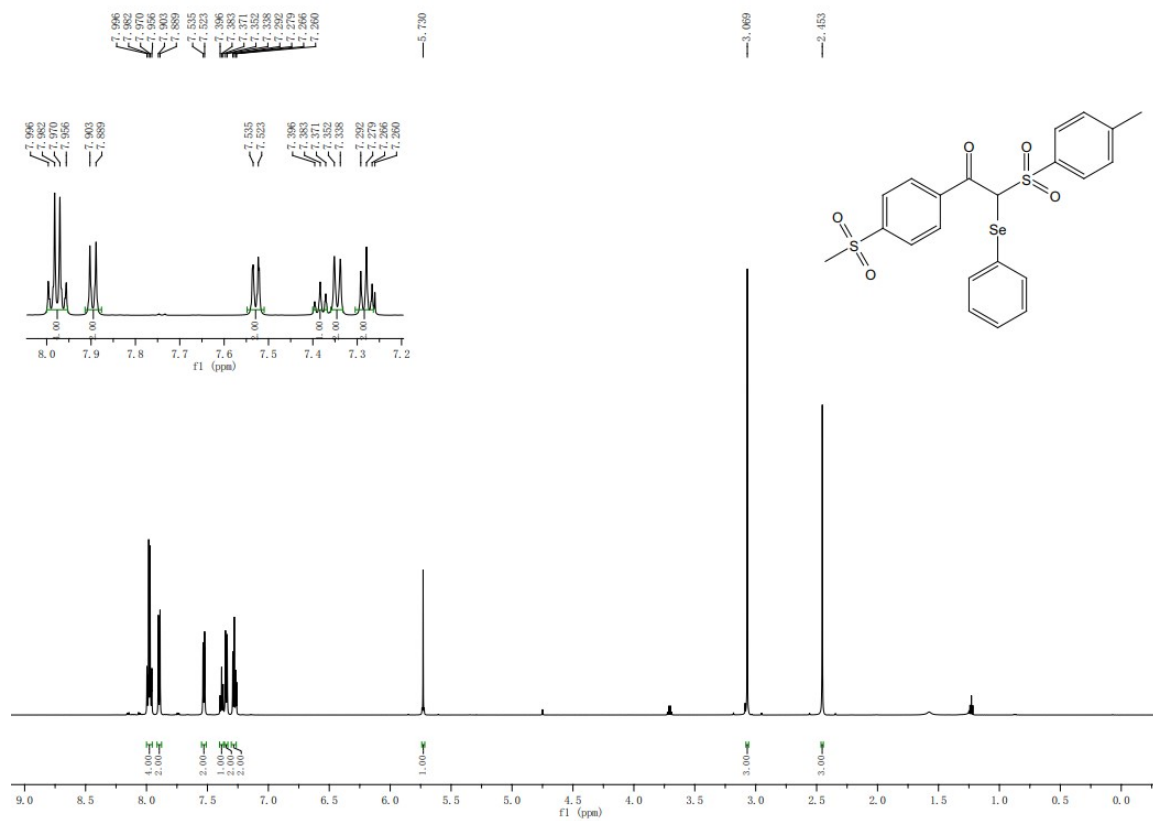

<sup>13</sup>C NMR of 3k

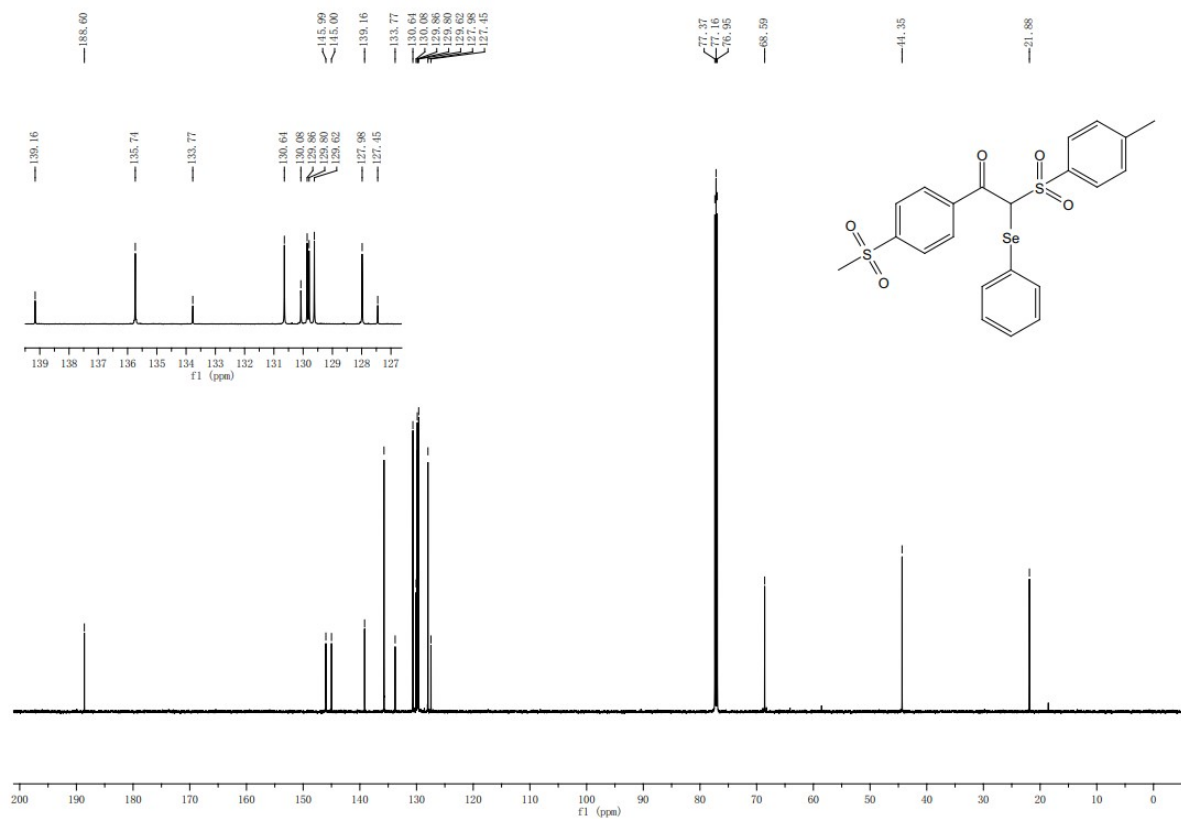

<sup>1</sup>H NMR of **31**

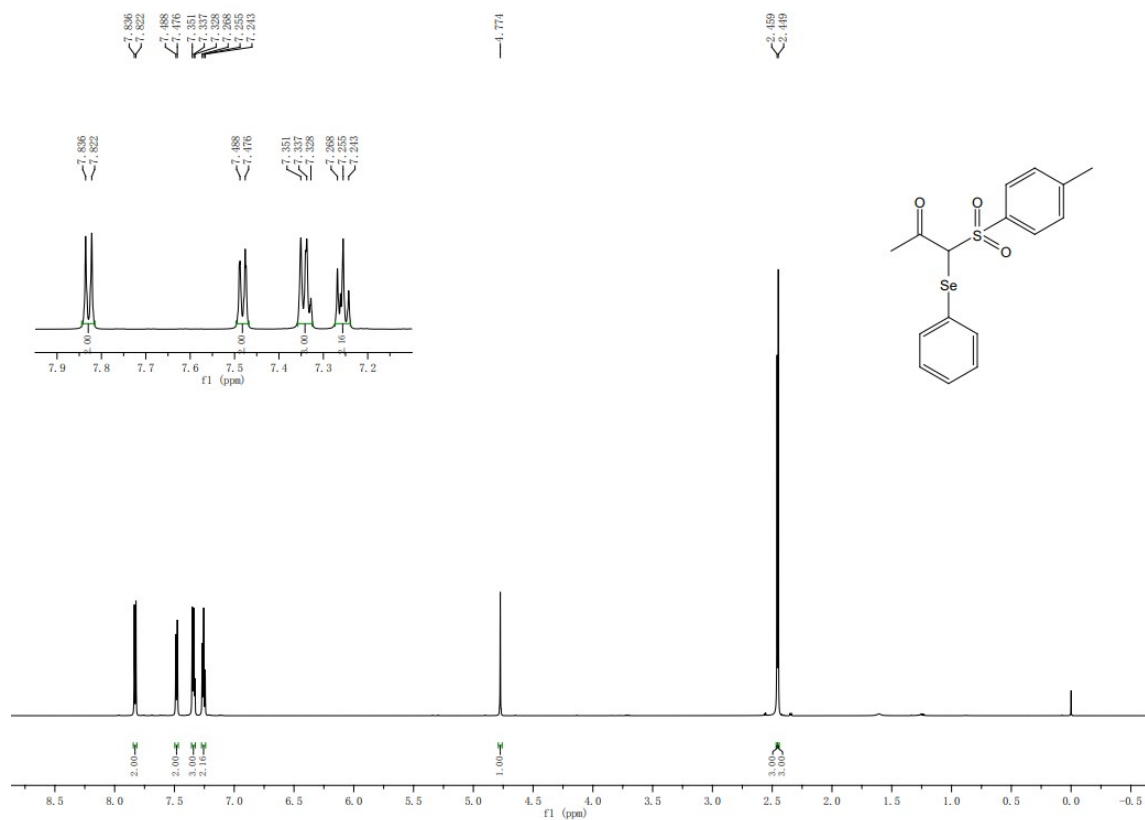

<sup>13</sup>C NMR of **31**

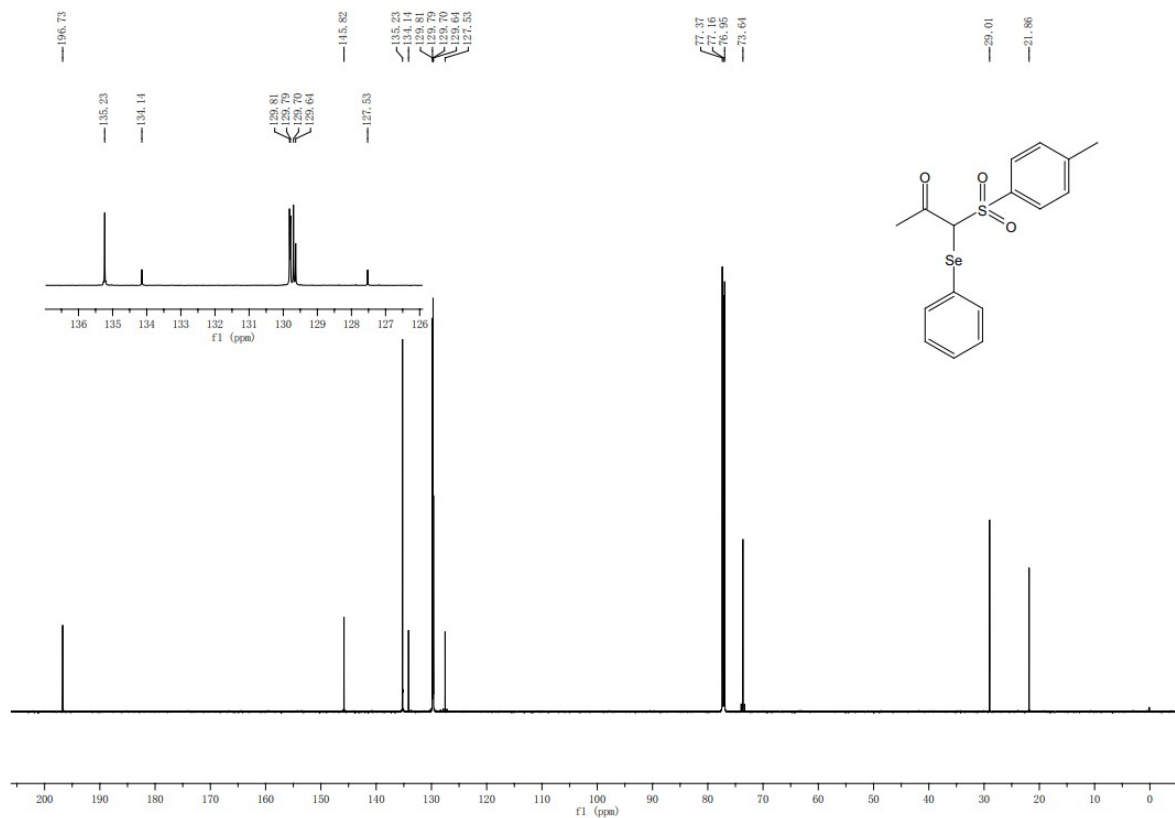

$^1\text{H}$  NMR of **3m**

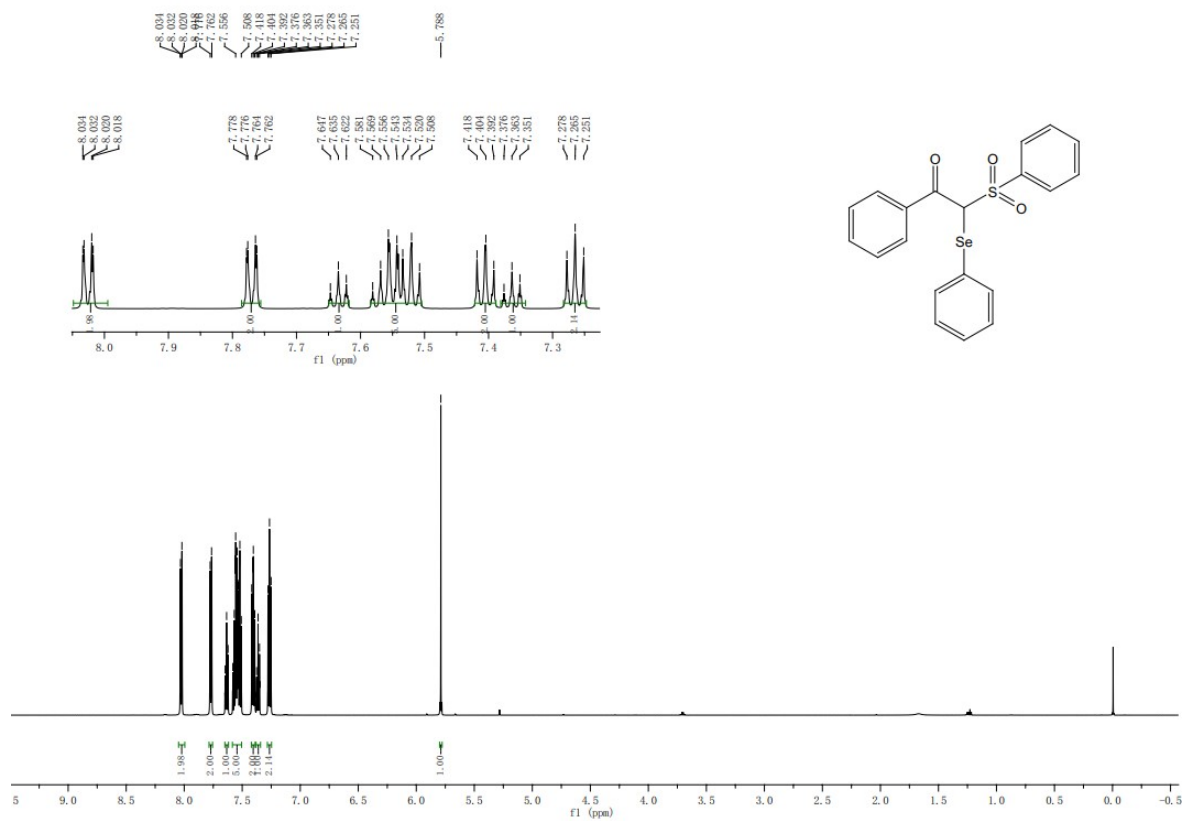

$^{13}\text{C}$  NMR of **3m**

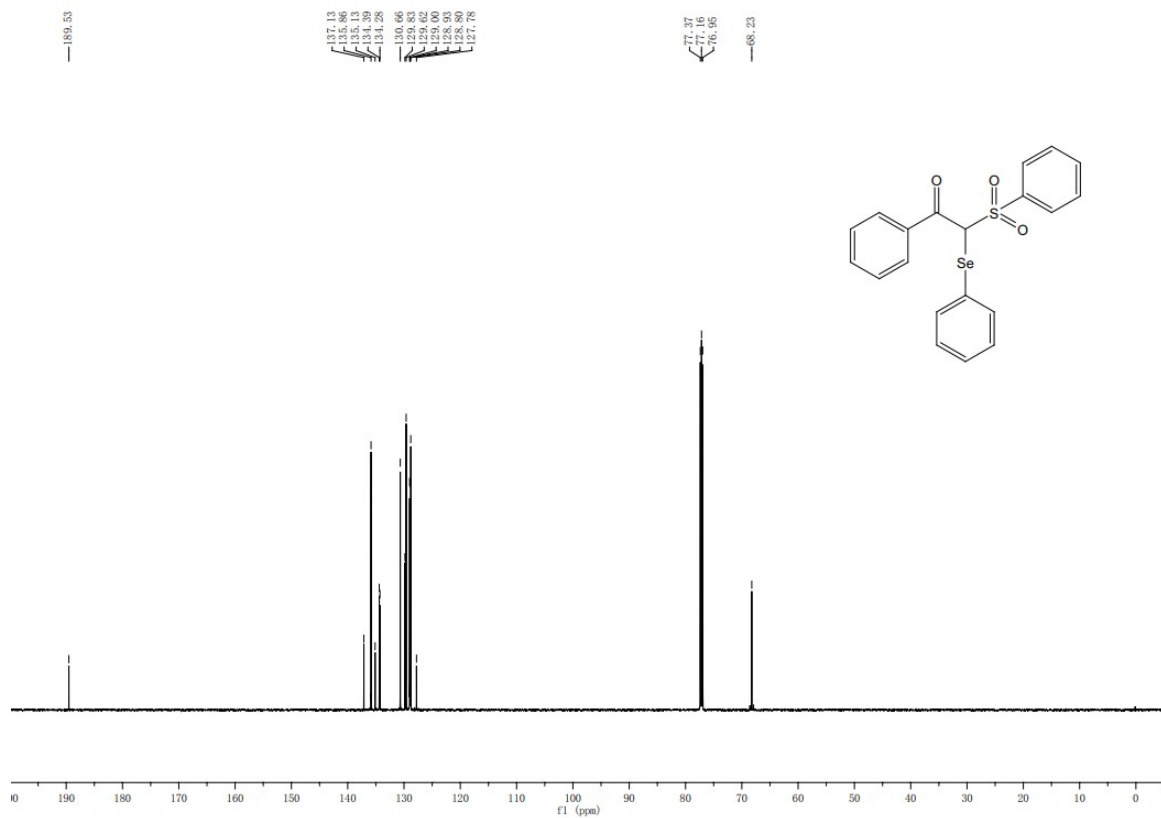



<sup>1</sup>H NMR of 3n

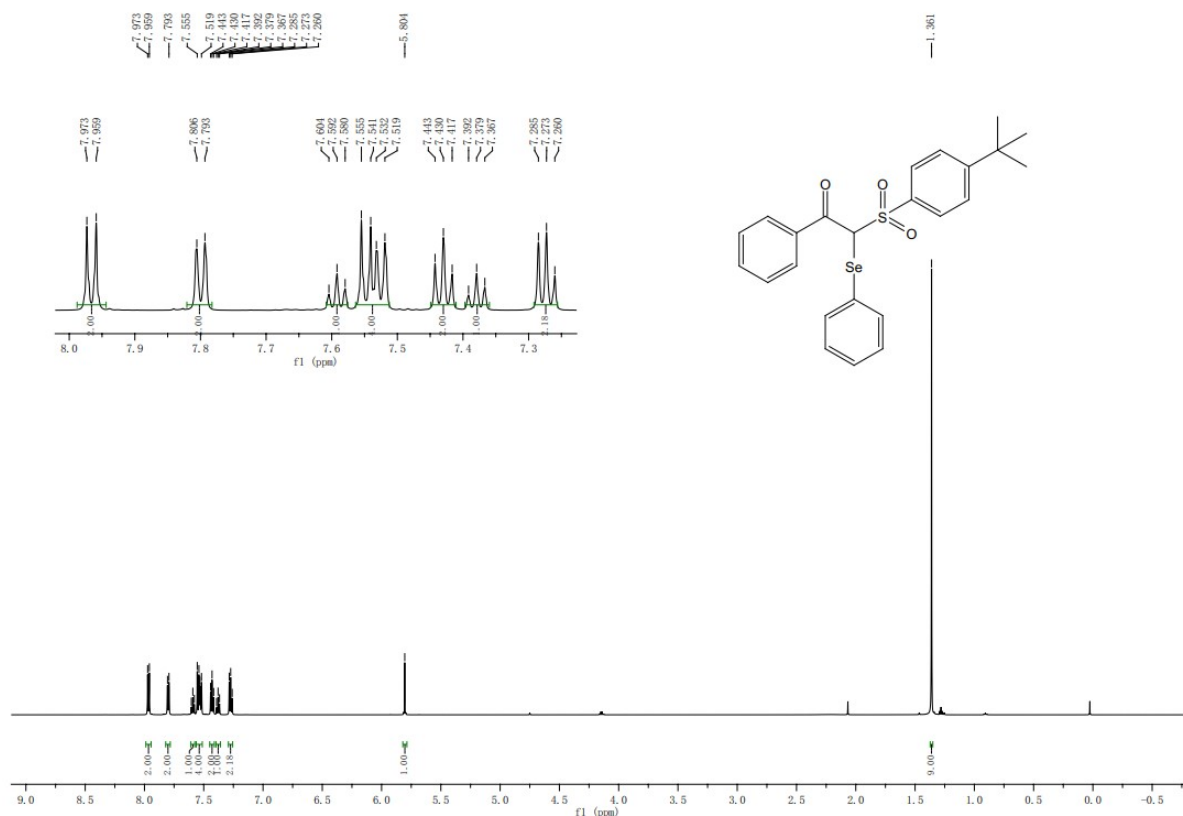

<sup>13</sup>C NMR of 3n

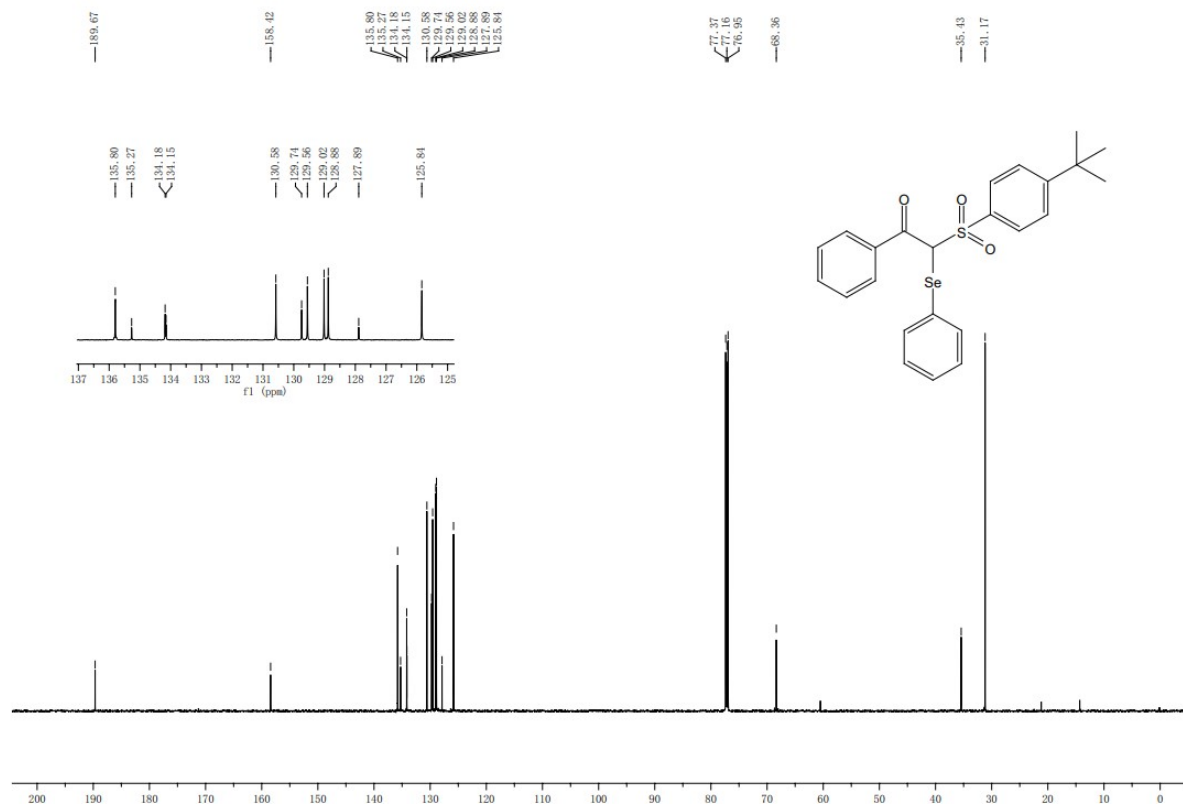



<sup>1</sup>H NMR of 3p

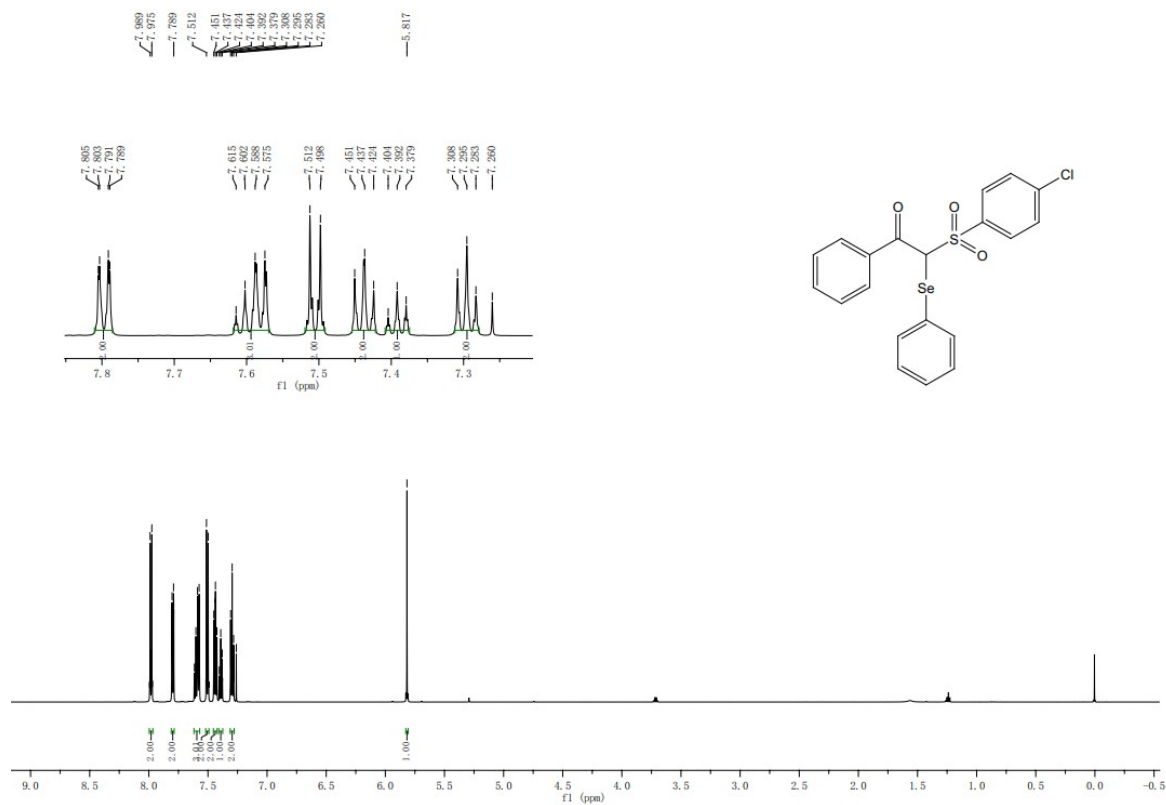

<sup>13</sup>C NMR of 3p

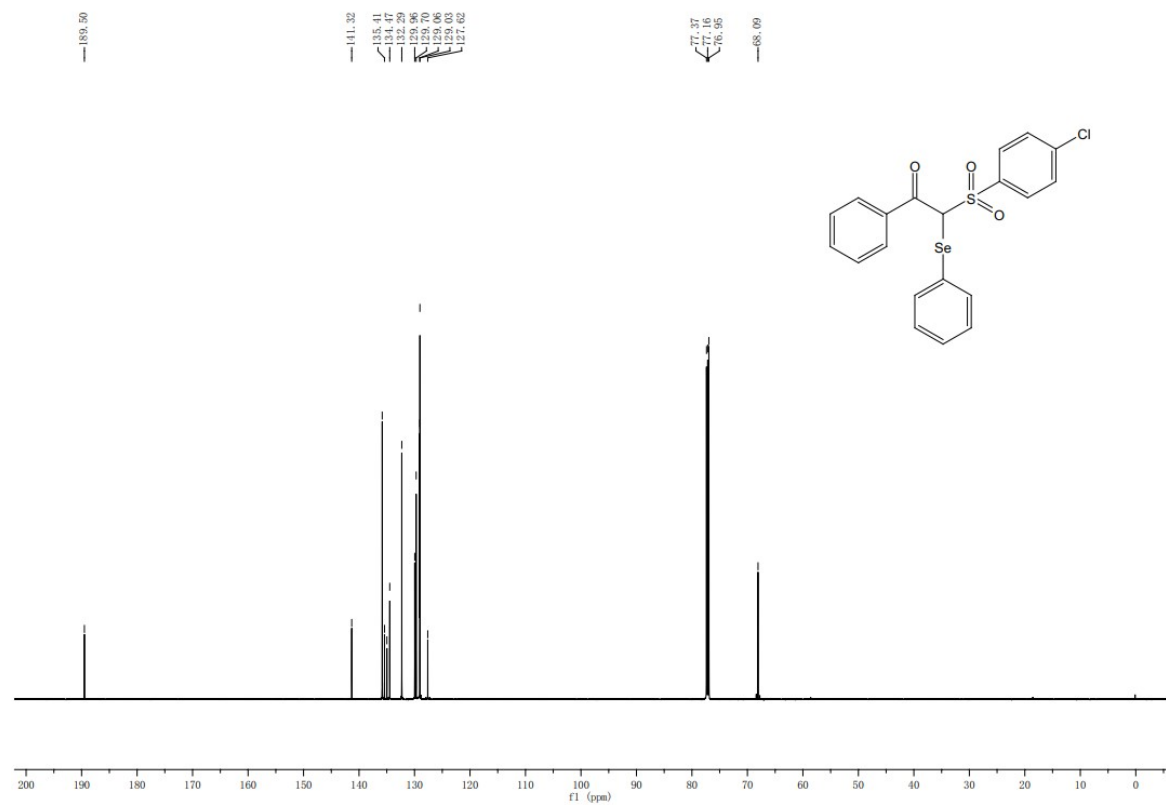

<sup>1</sup>H NMR of 3q

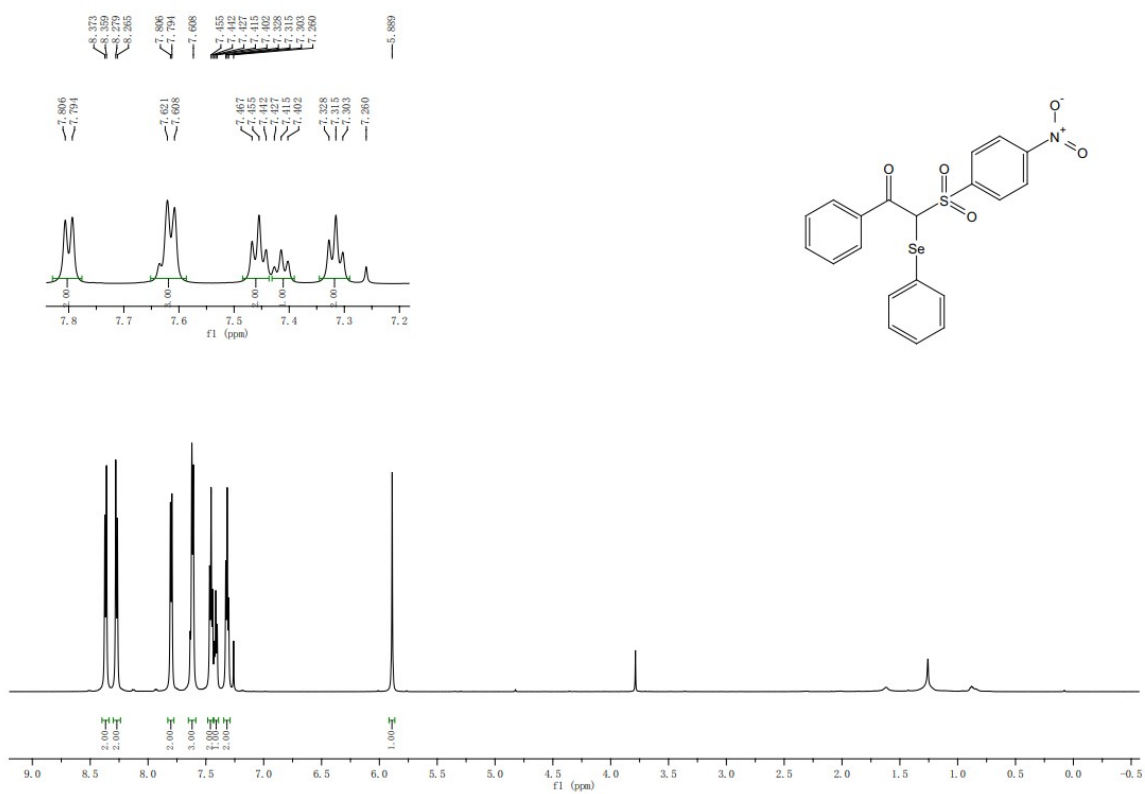

<sup>13</sup>C NMR of 3q

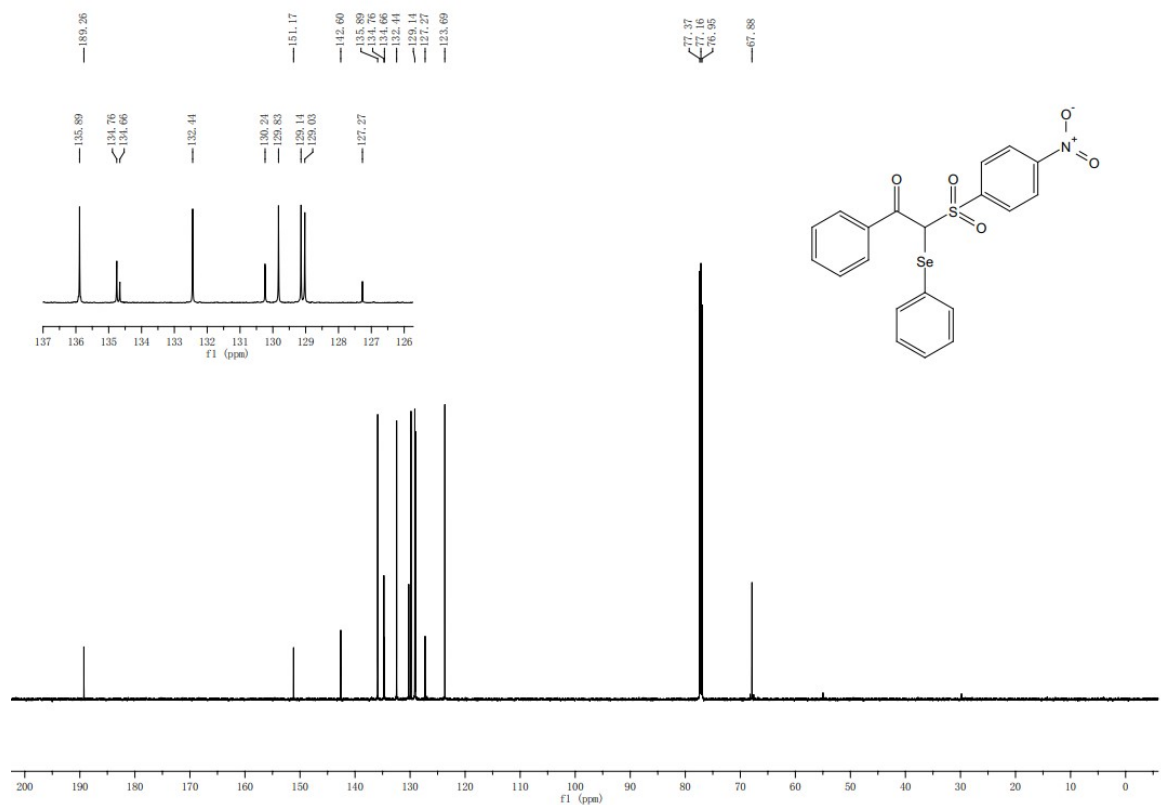

<sup>1</sup>H NMR of **3r**

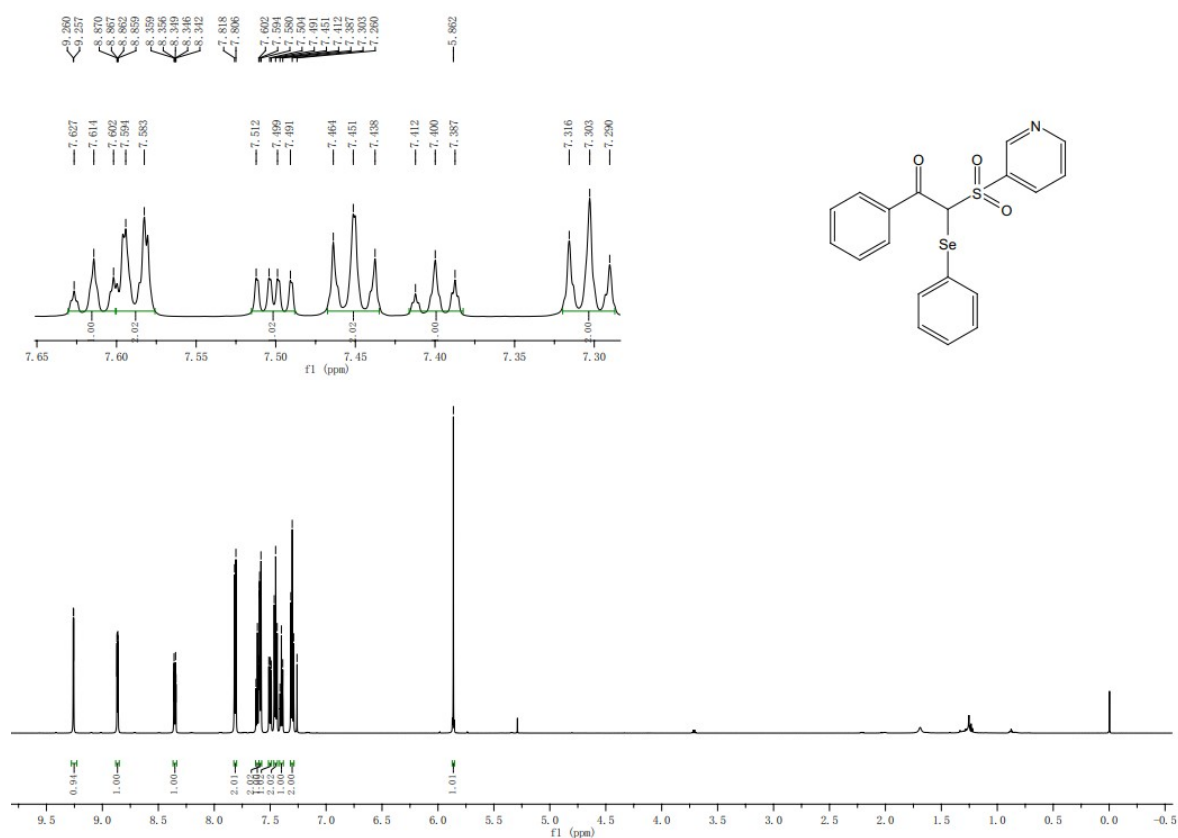

<sup>13</sup>C NMR of **3r**

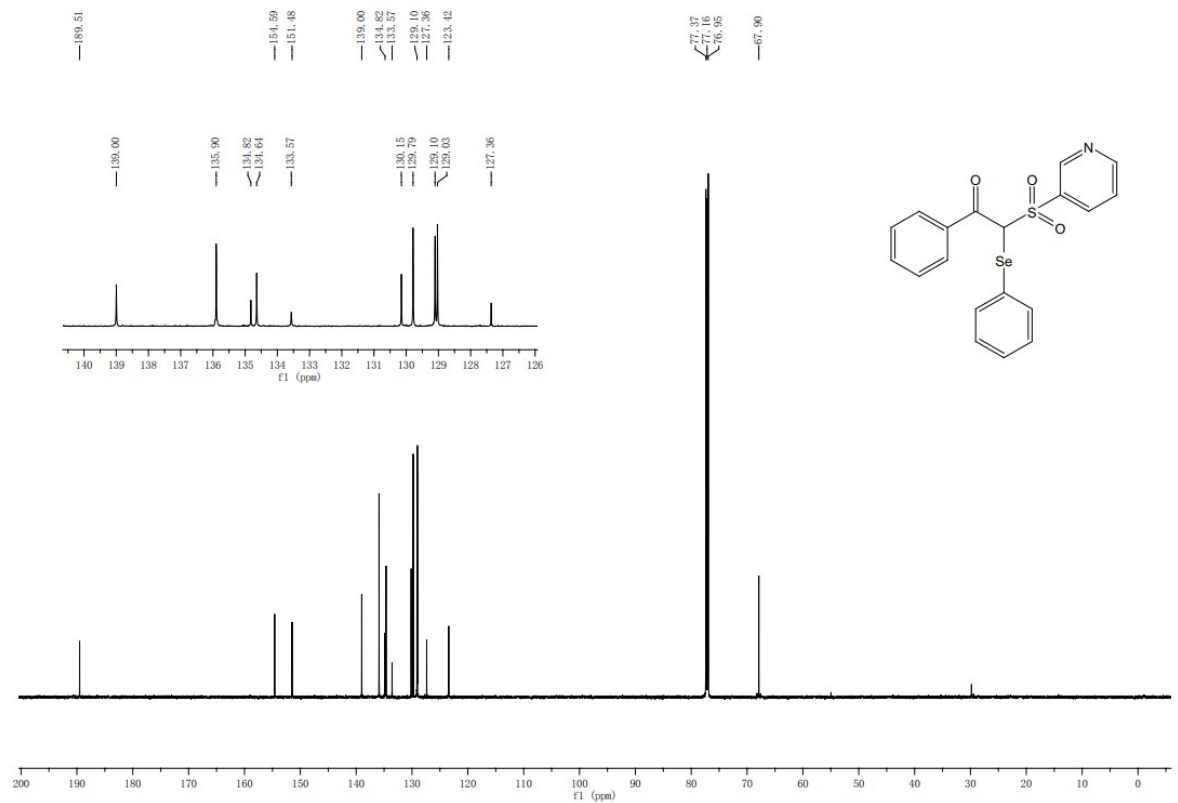

附录

<sup>1</sup>H NMR of 3s

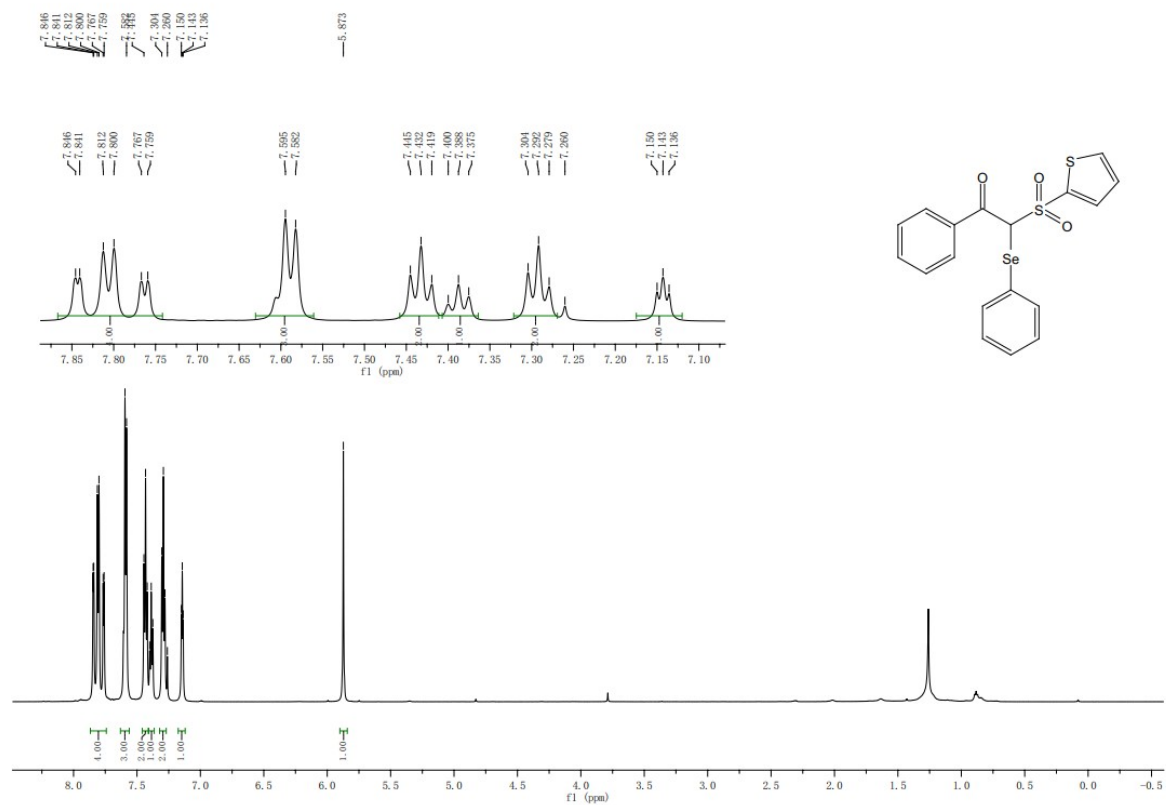

<sup>13</sup>C NMR of 3s

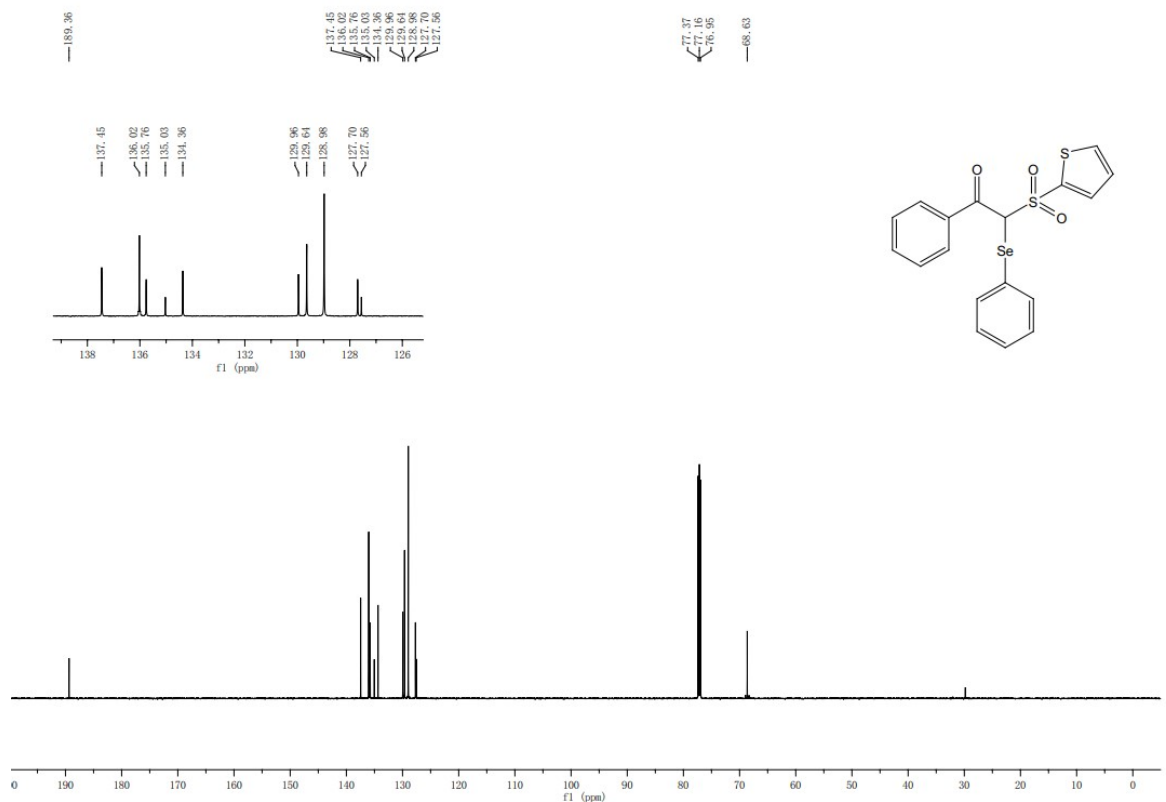

$^1\text{H}$  NMR of **3t**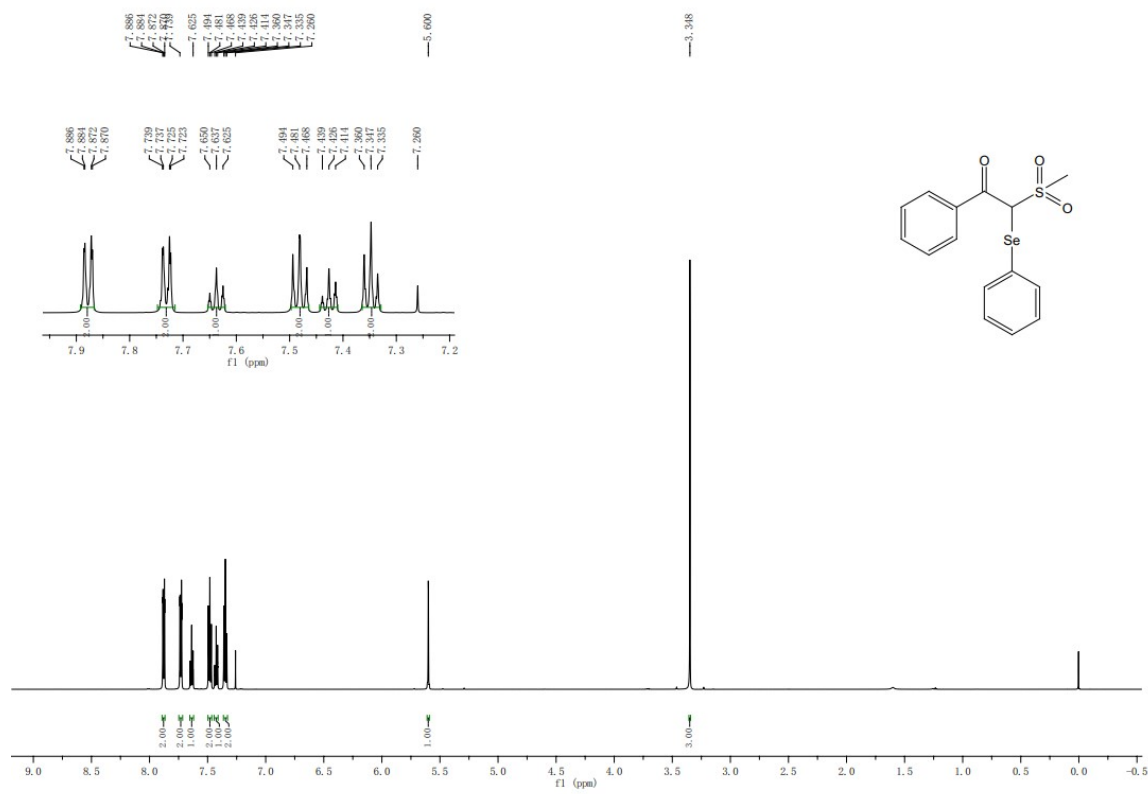 $^{13}\text{C}$  NMR of **3t**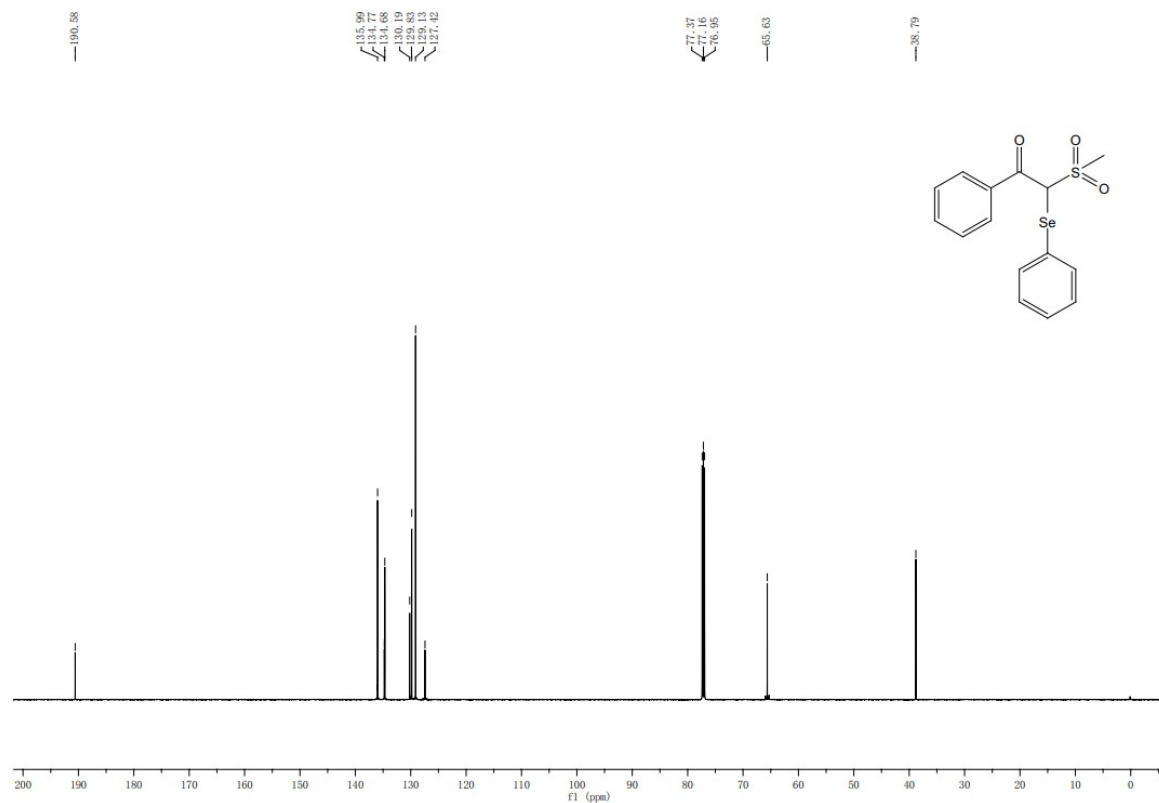

# 附录

## <sup>1</sup>H NMR of **3u**

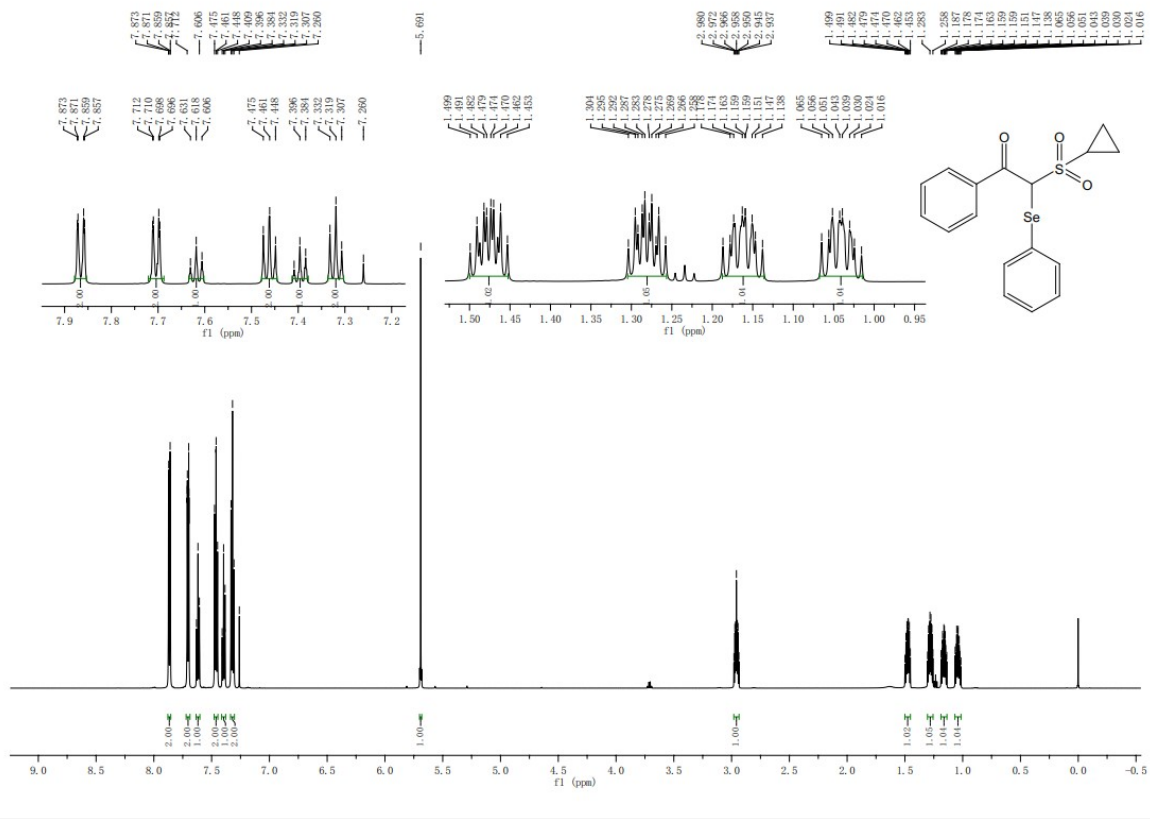

## <sup>13</sup>C NMR of **3u**

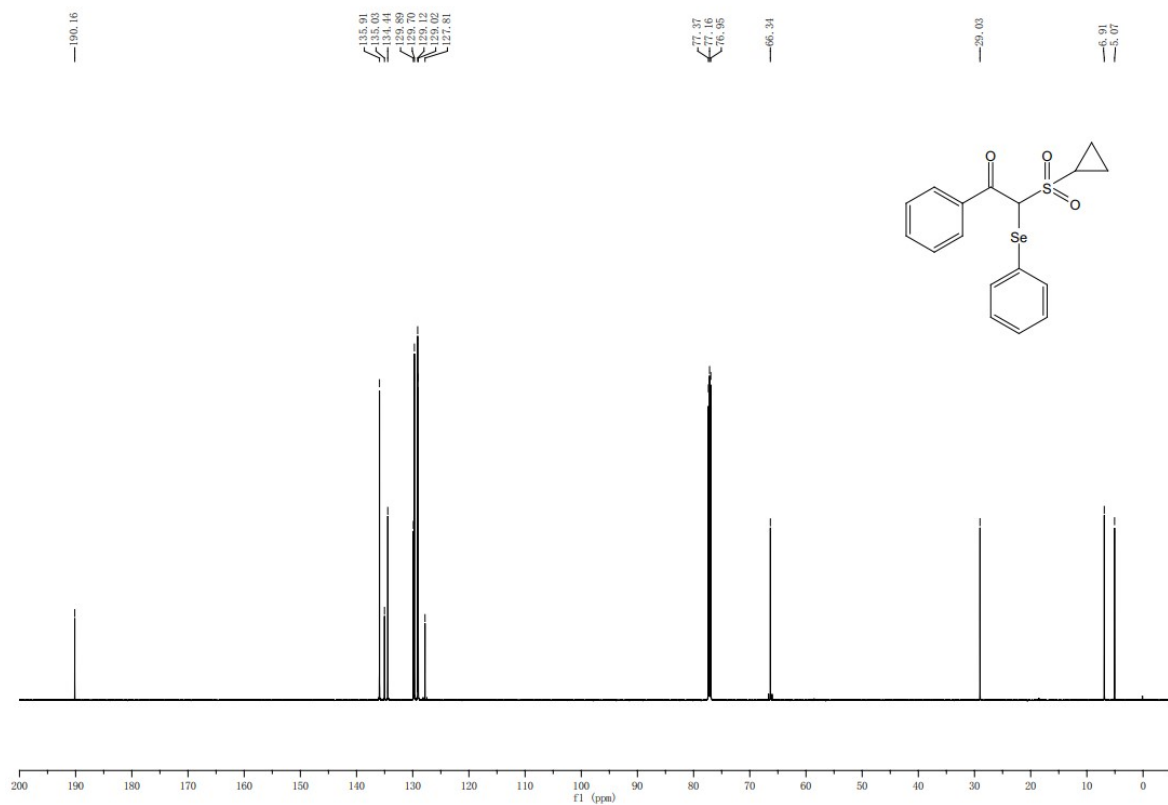



附录

<sup>1</sup>H NMR of 3v

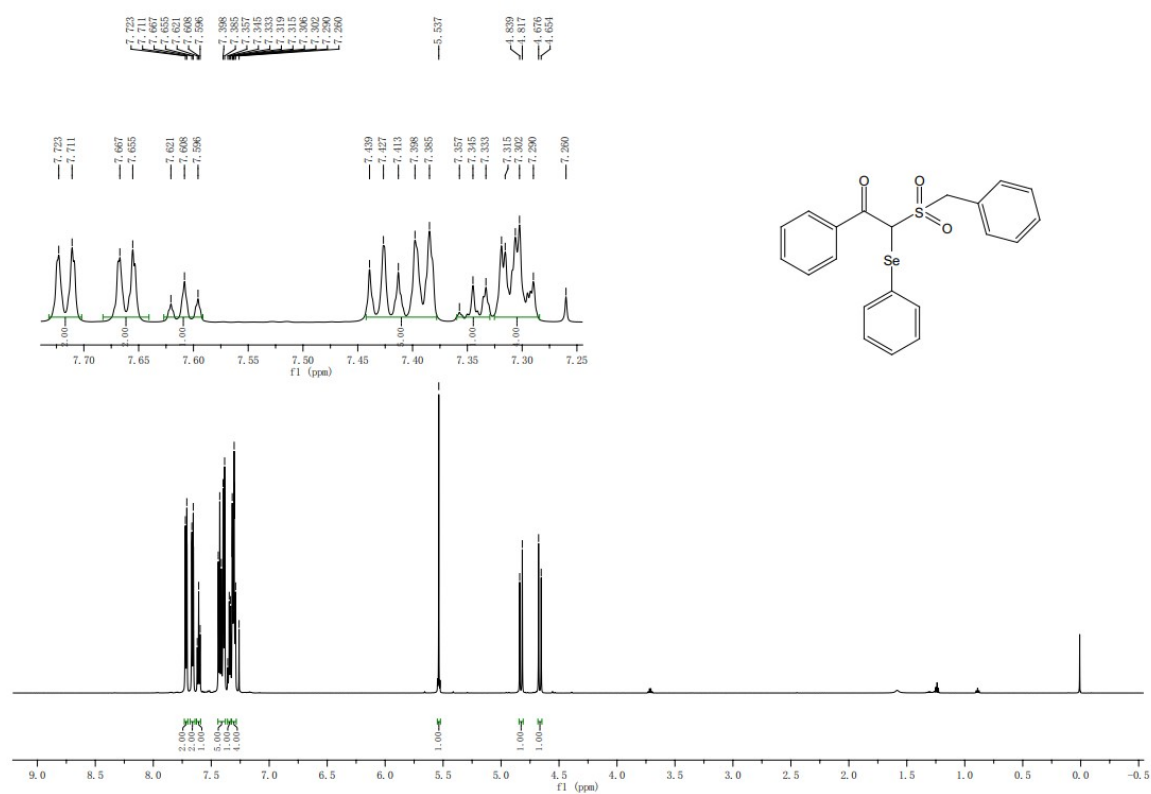

<sup>13</sup>C NMR of 3v

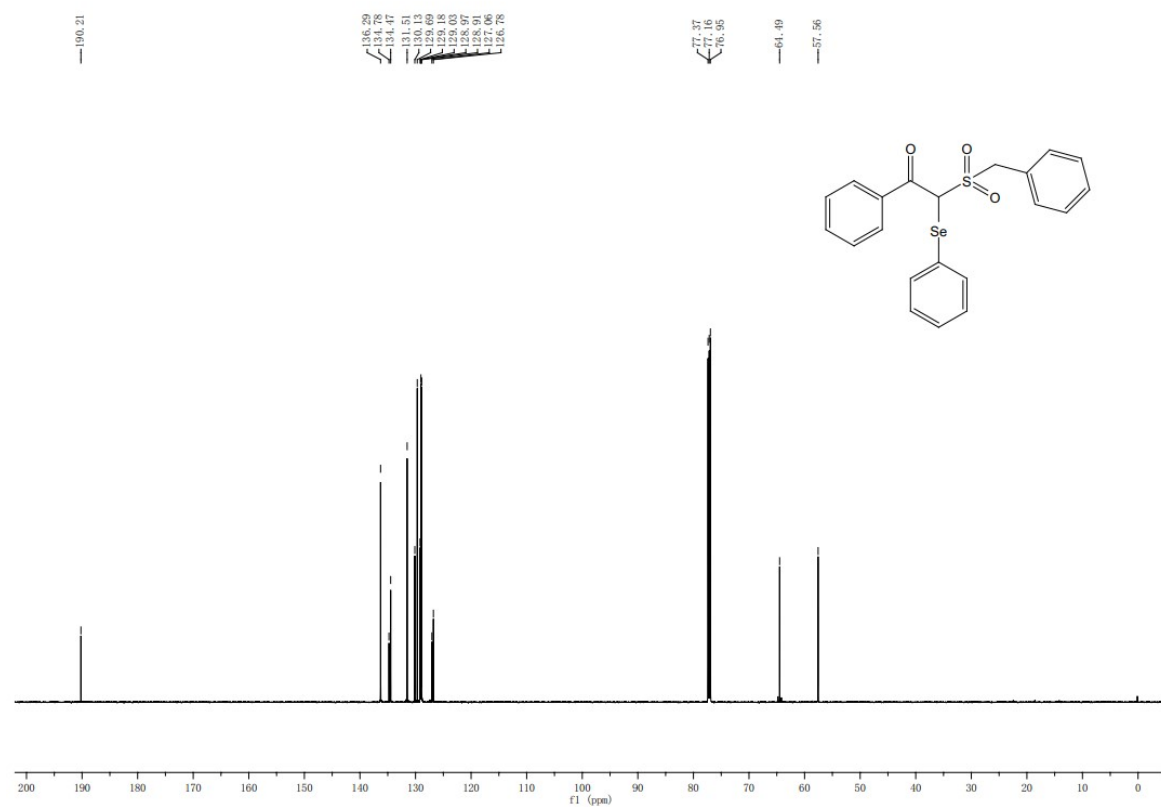

<sup>1</sup>H NMR of 4a

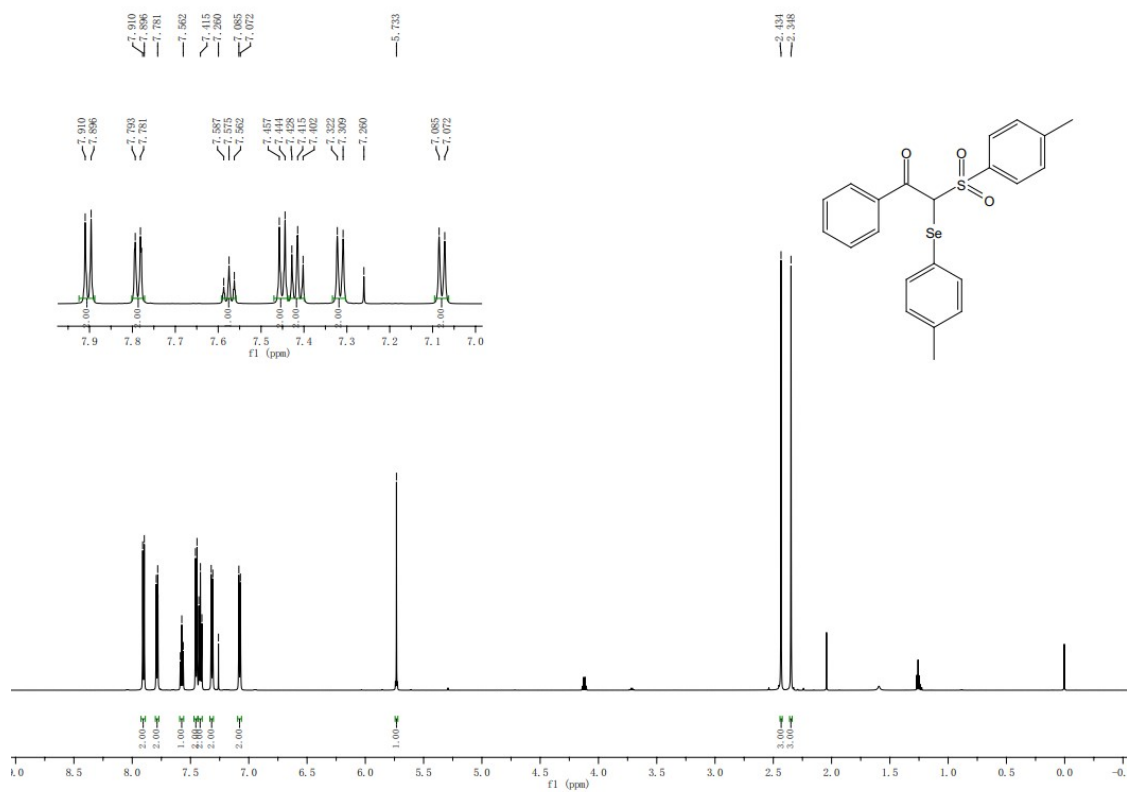

<sup>13</sup>C NMR of 4a

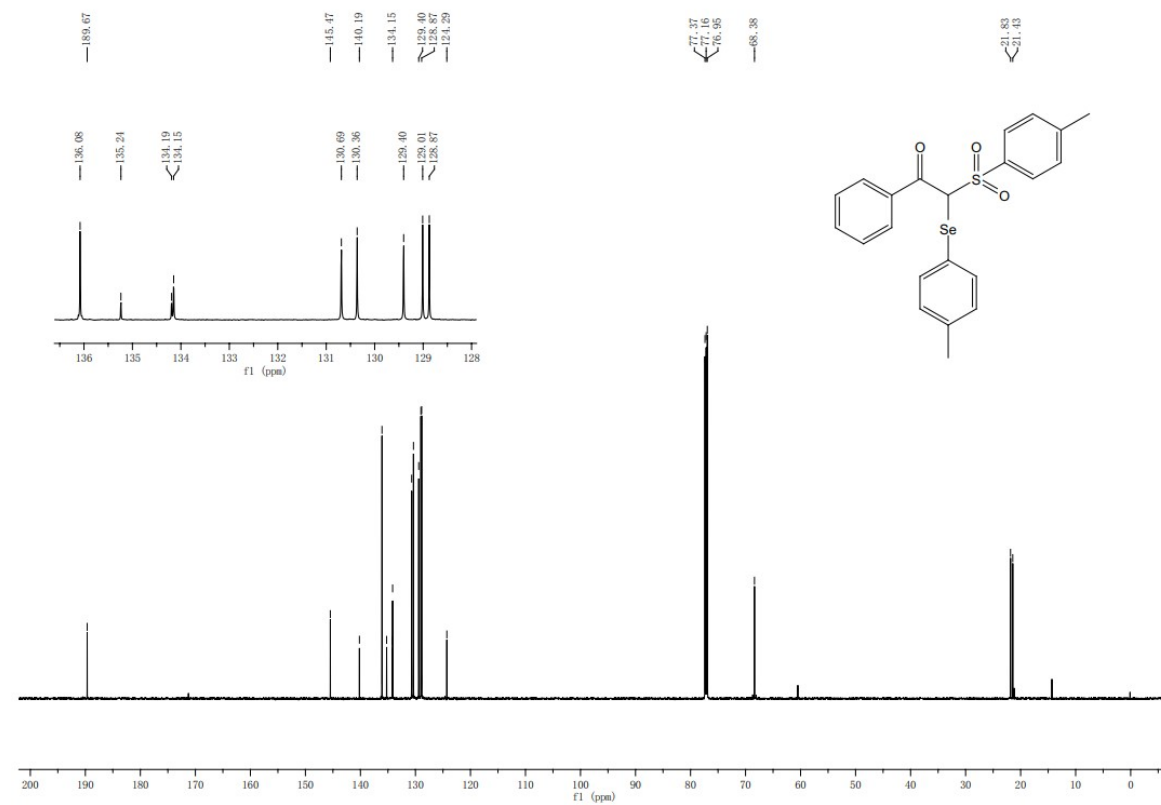

<sup>1</sup>H NMR of 4b

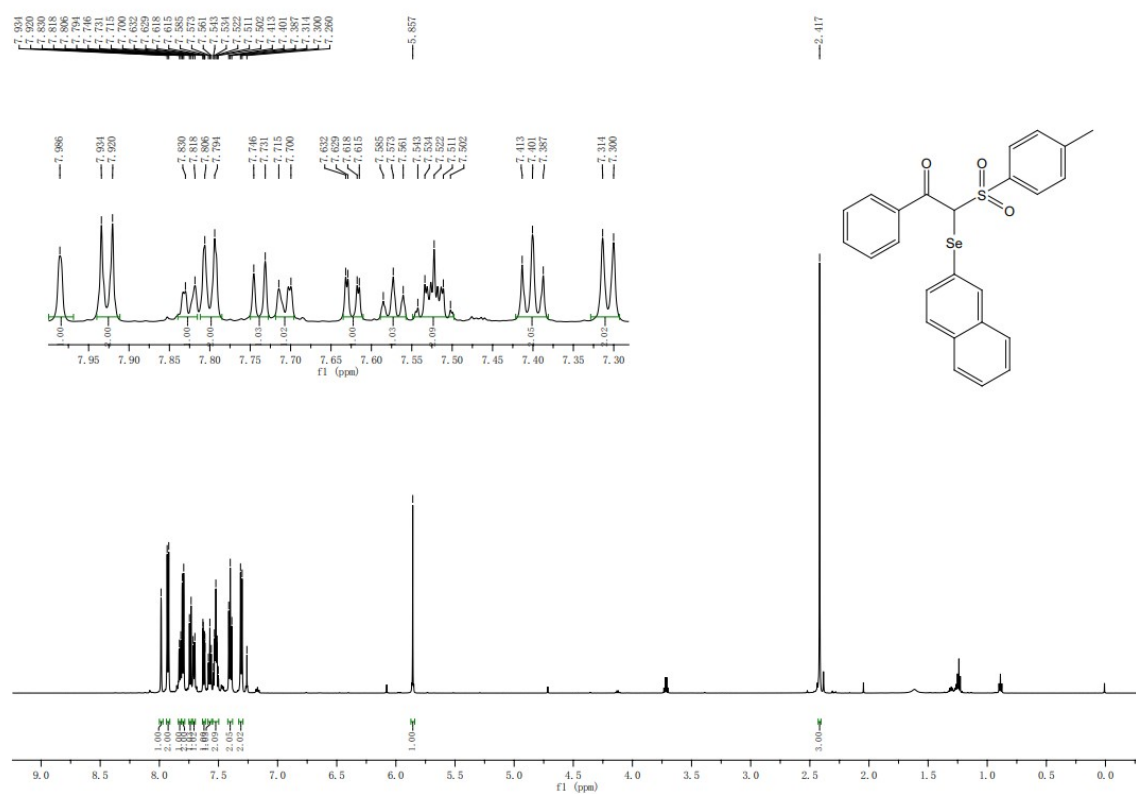

<sup>13</sup>C NMR of 4b

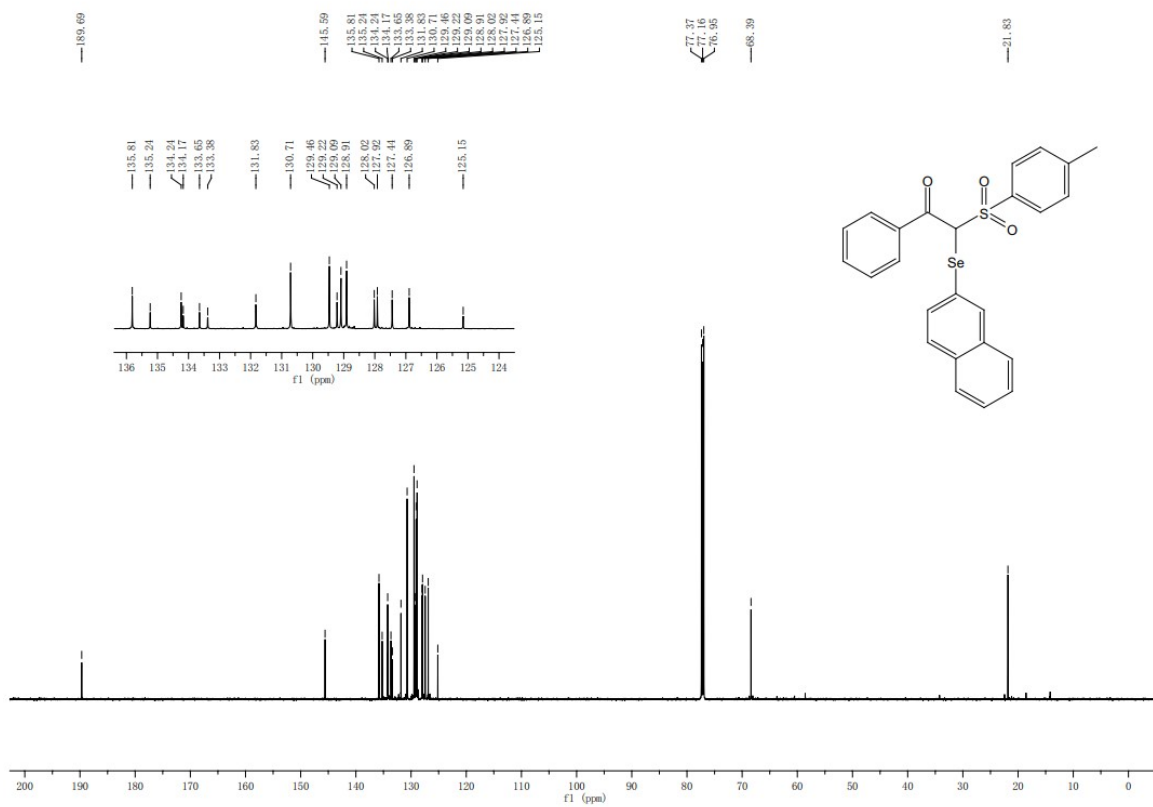

<sup>1</sup>H NMR of 4c

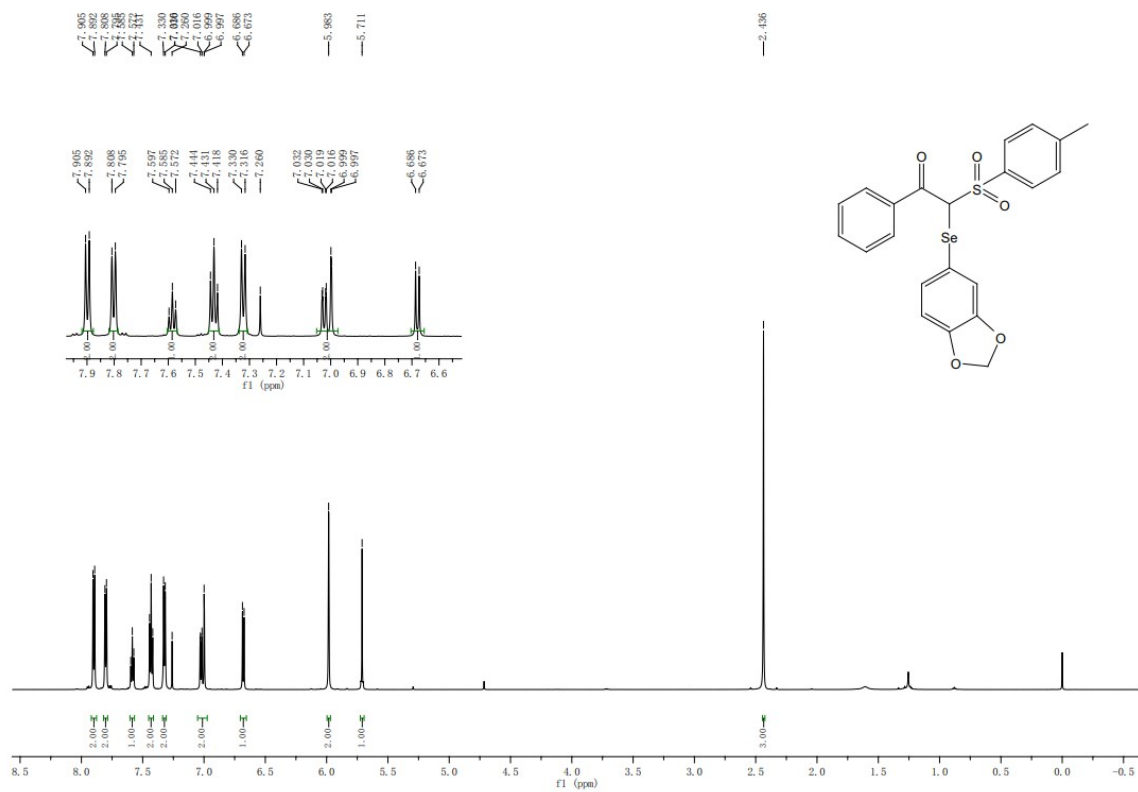

<sup>13</sup>C NMR of 4c

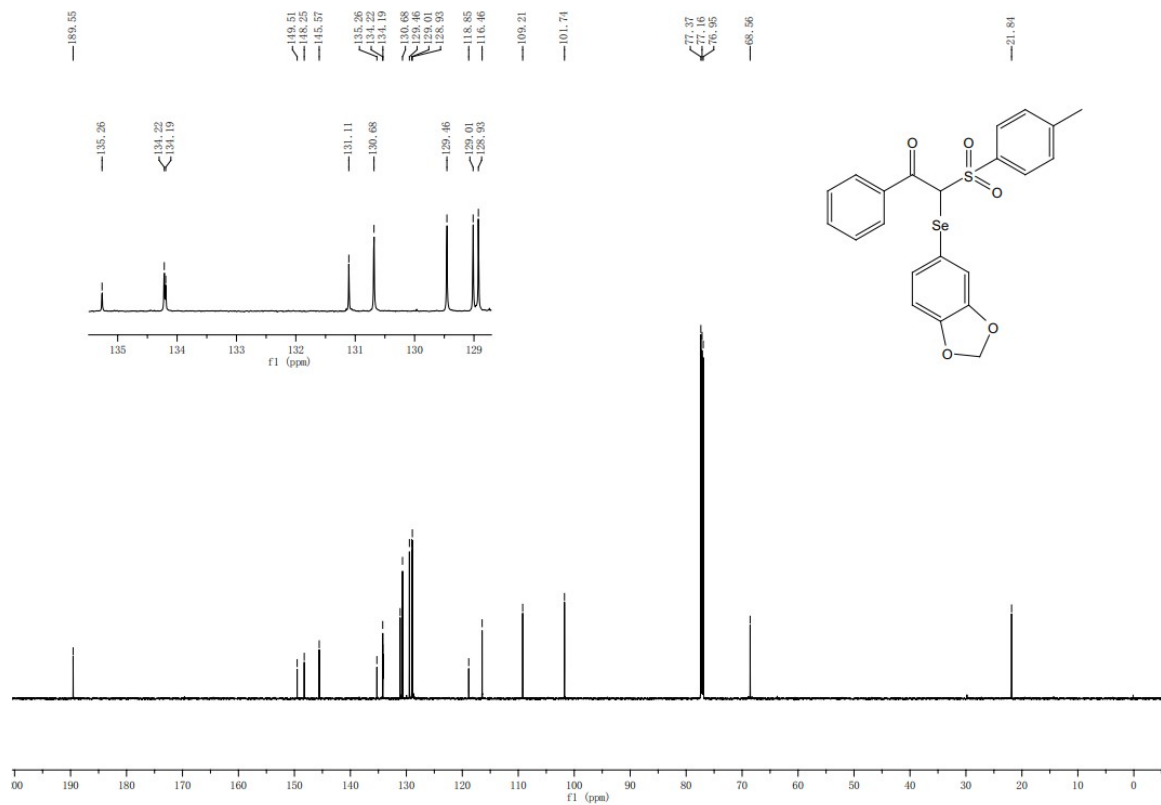

<sup>1</sup>H NMR of 4d

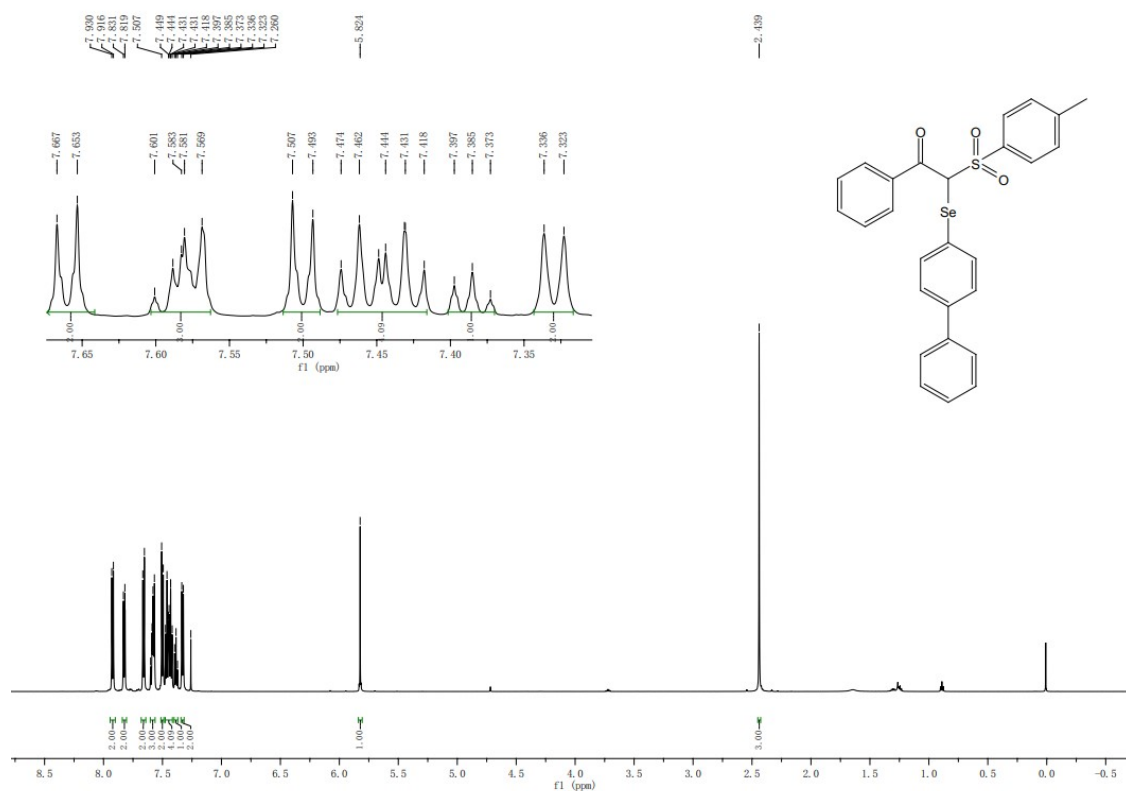

<sup>13</sup>C NMR of 4d

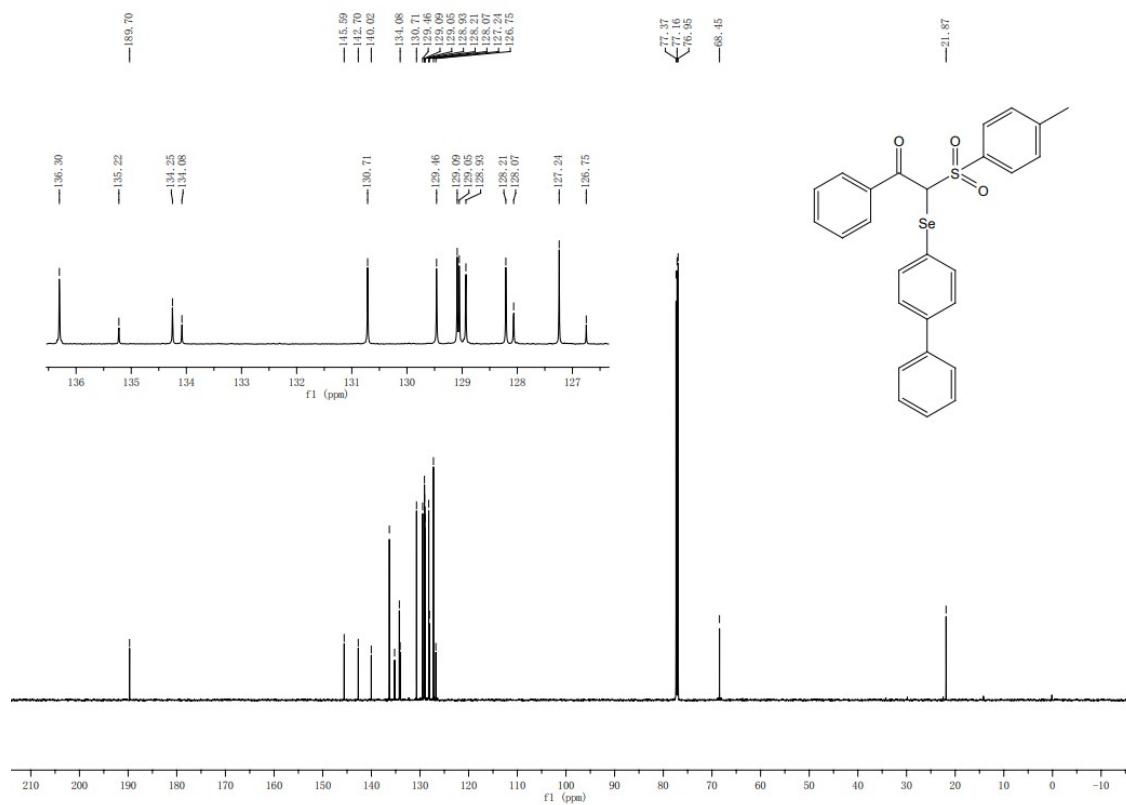

<sup>1</sup>H NMR of 4e

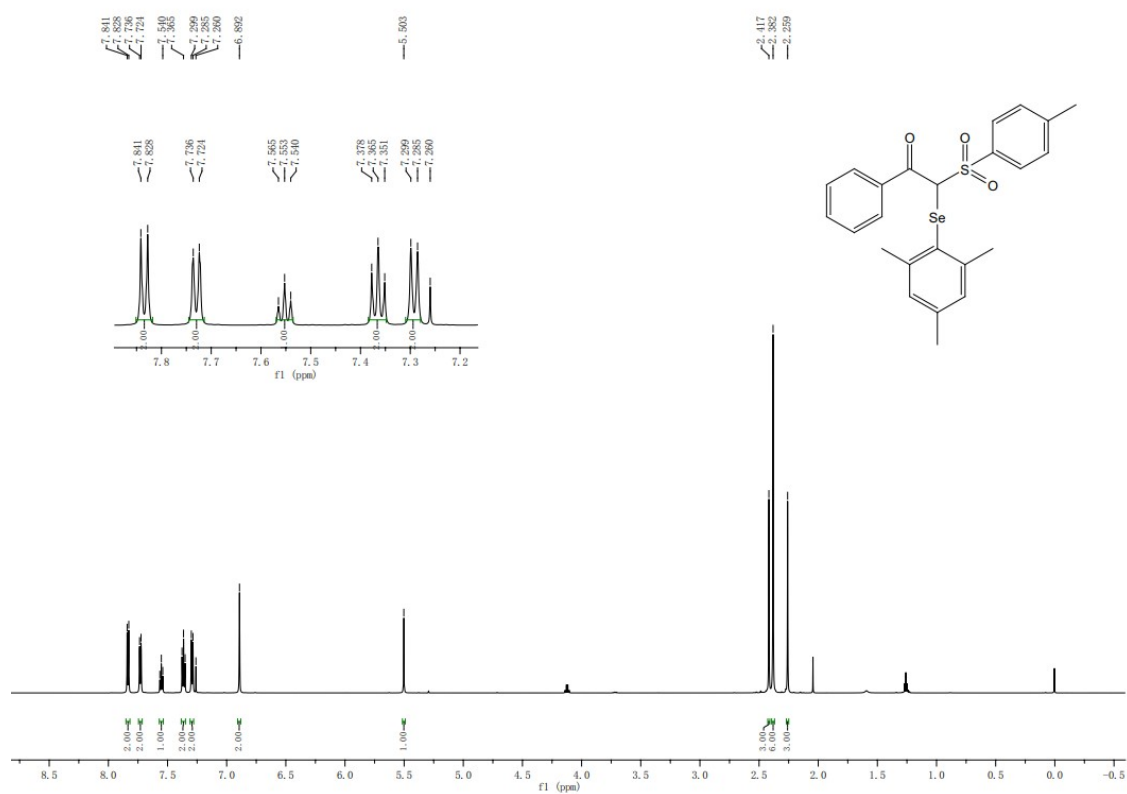

<sup>13</sup>C NMR of 4e

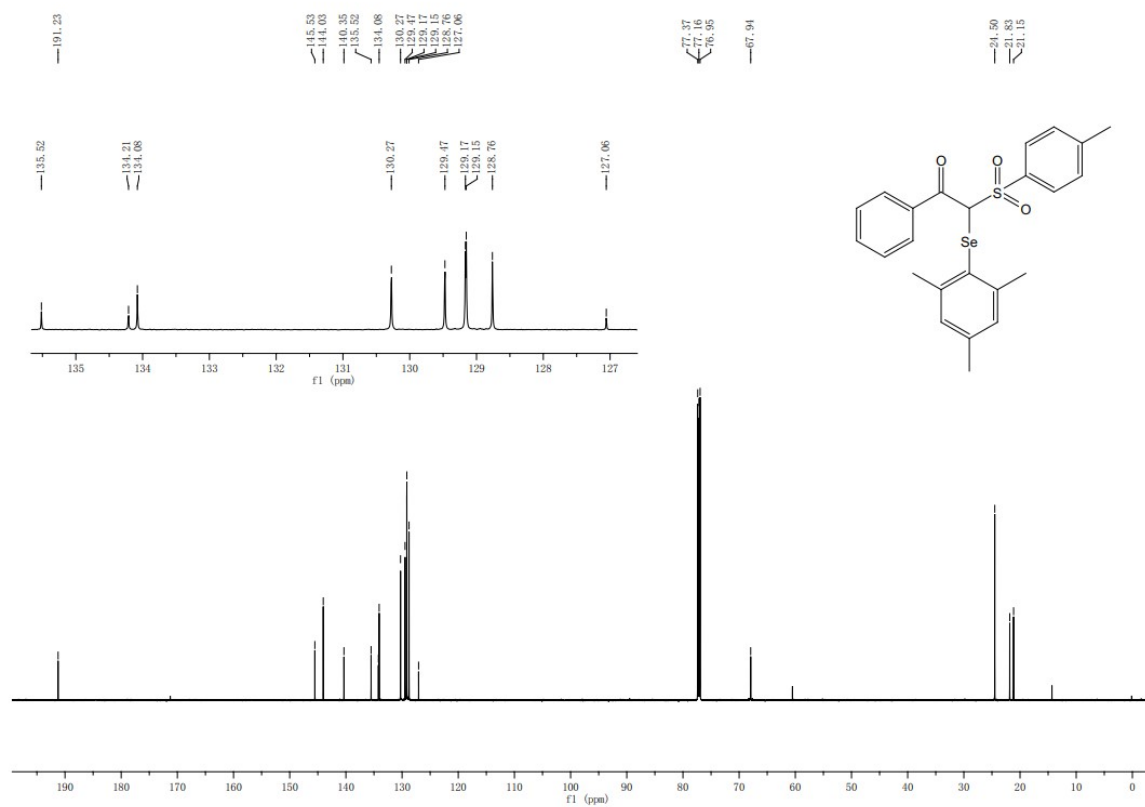

$^1\text{H}$  NMR of 4f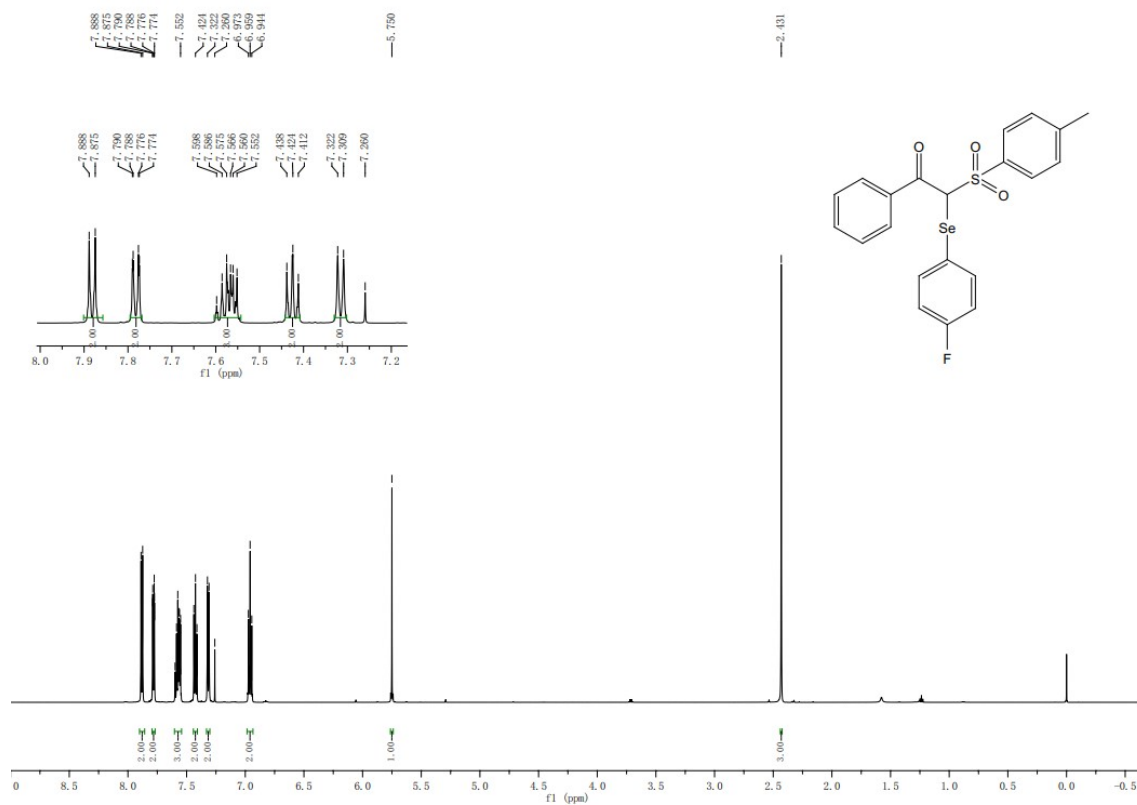 $^{13}\text{C}$  NMR of 4f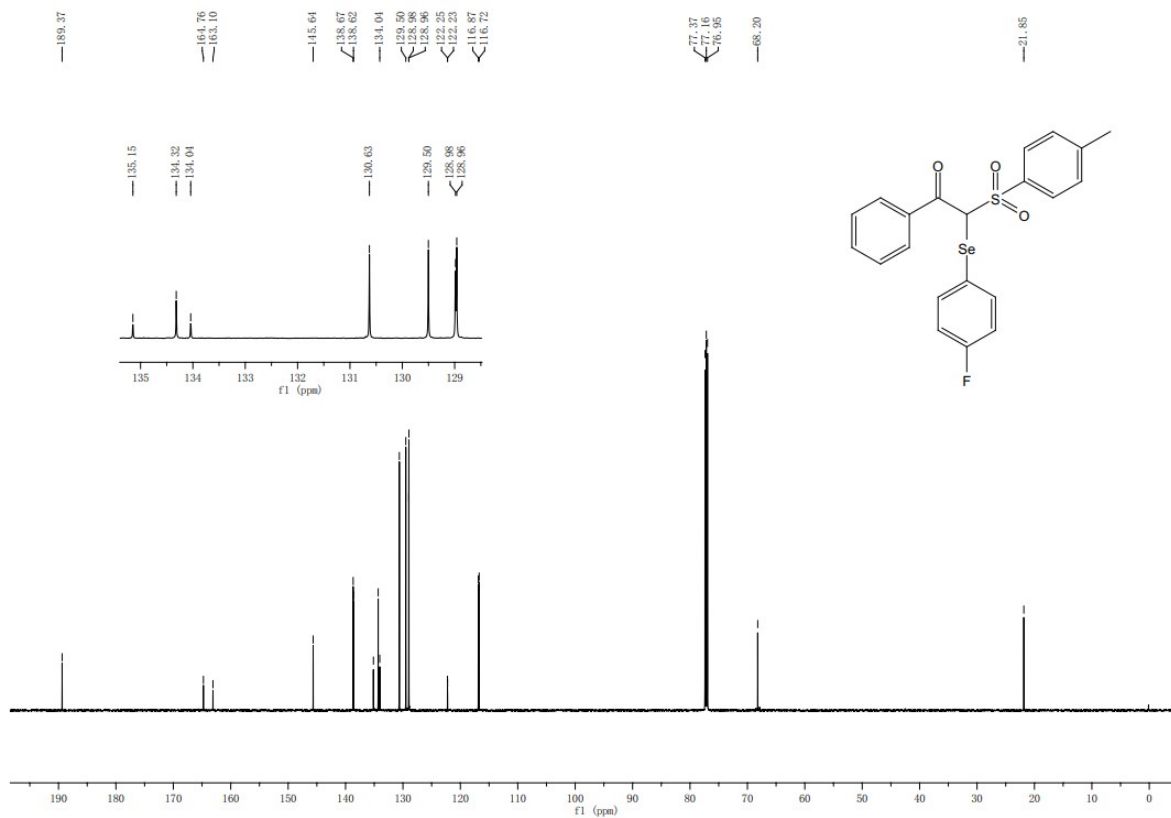

<sup>1</sup>H NMR of 4g

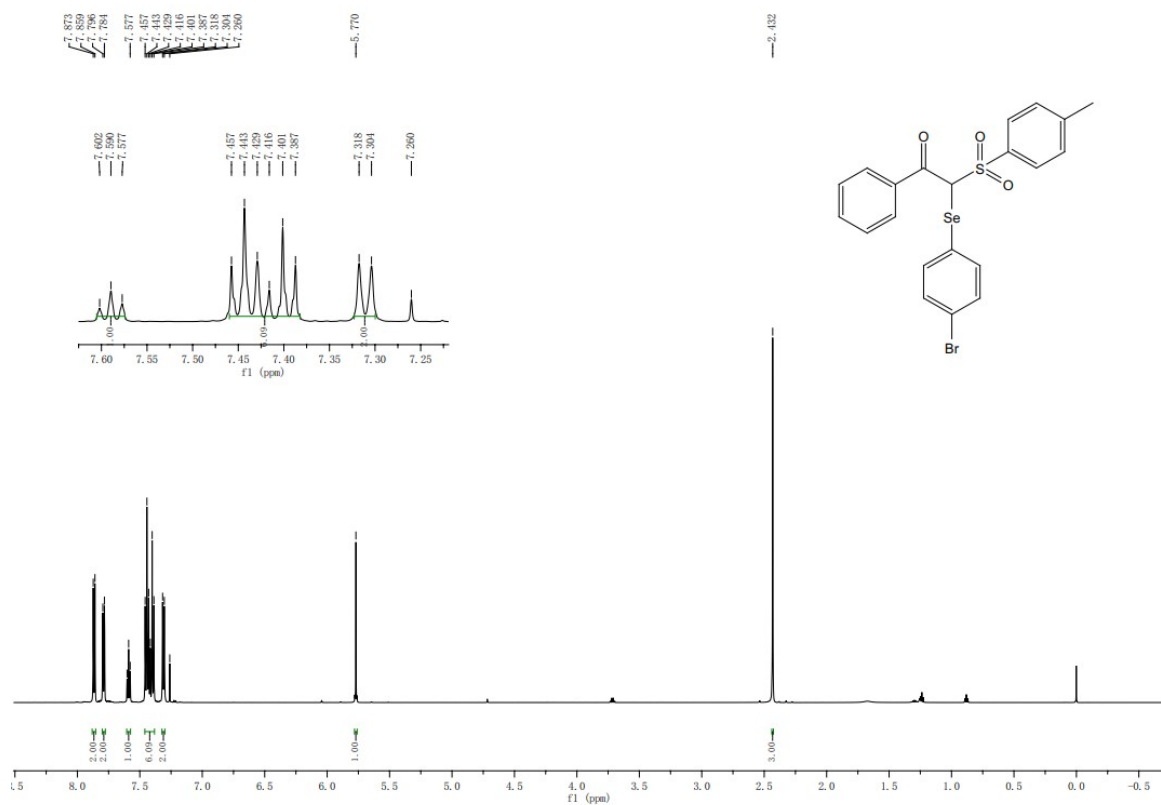

<sup>13</sup>C NMR of 4g

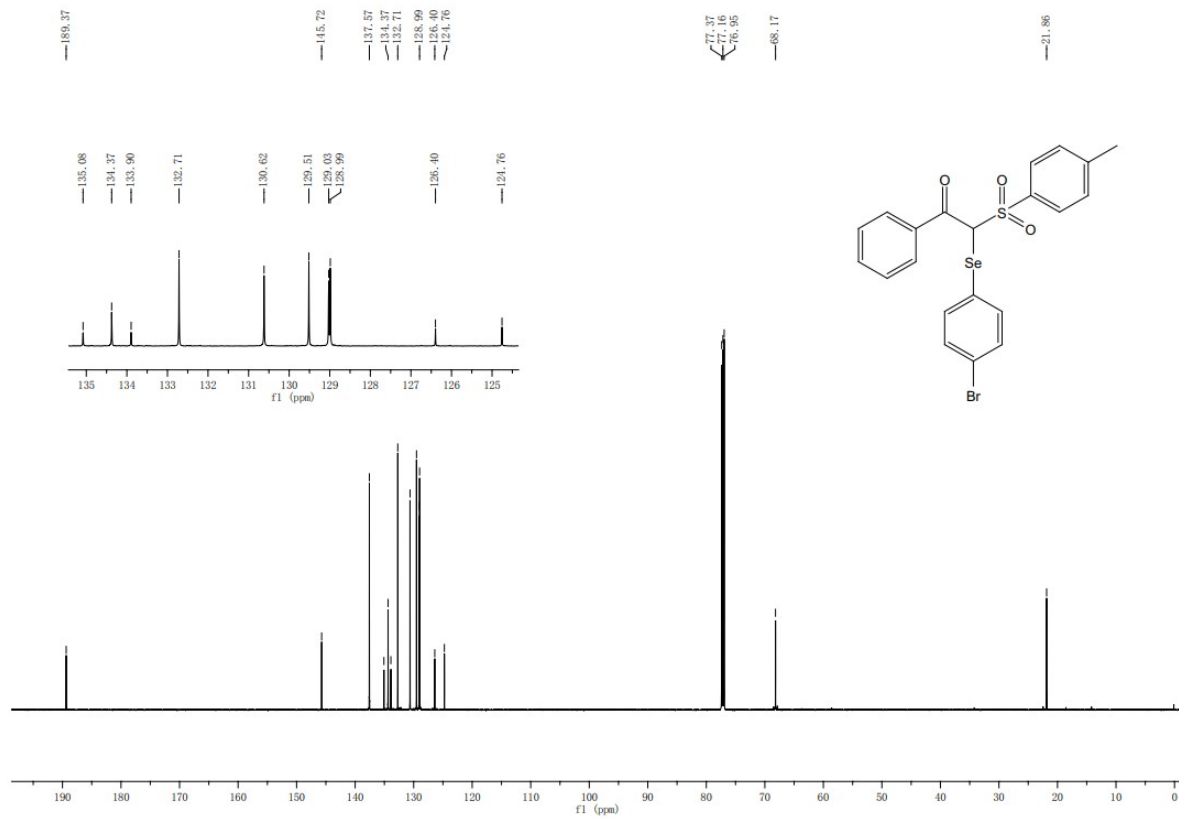



<sup>1</sup>H NMR of 4h

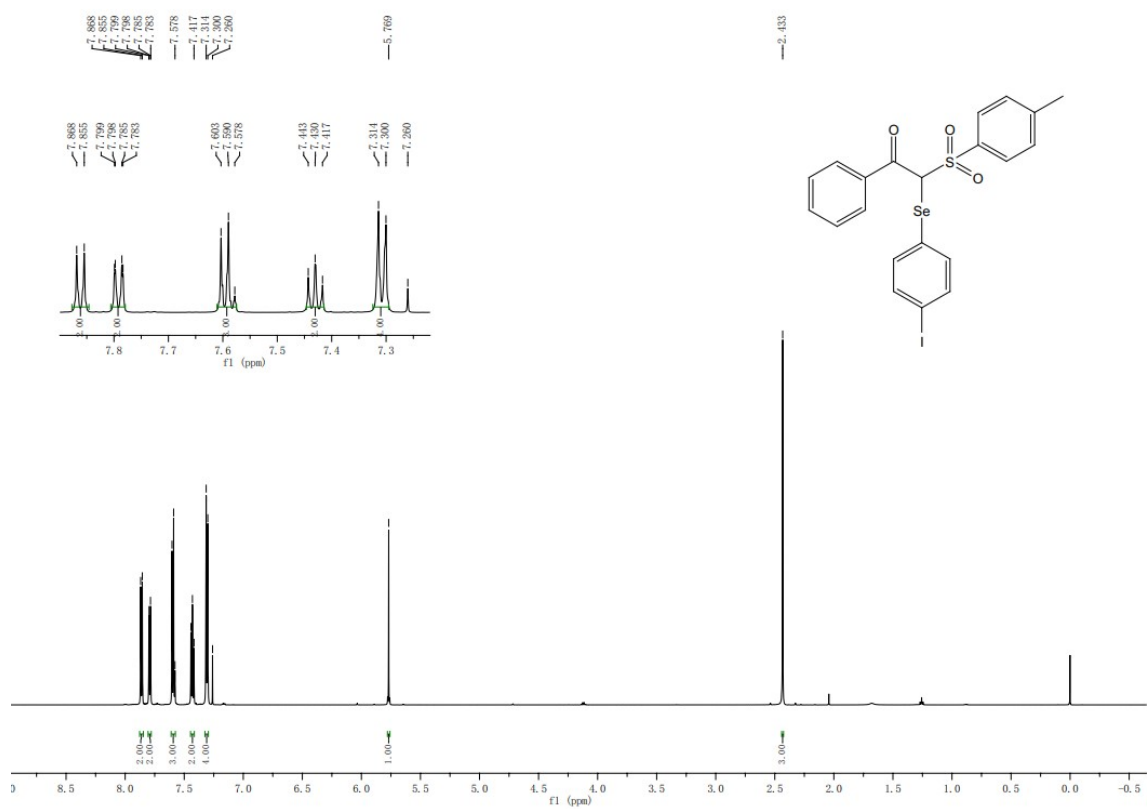

<sup>13</sup>C NMR of 4h

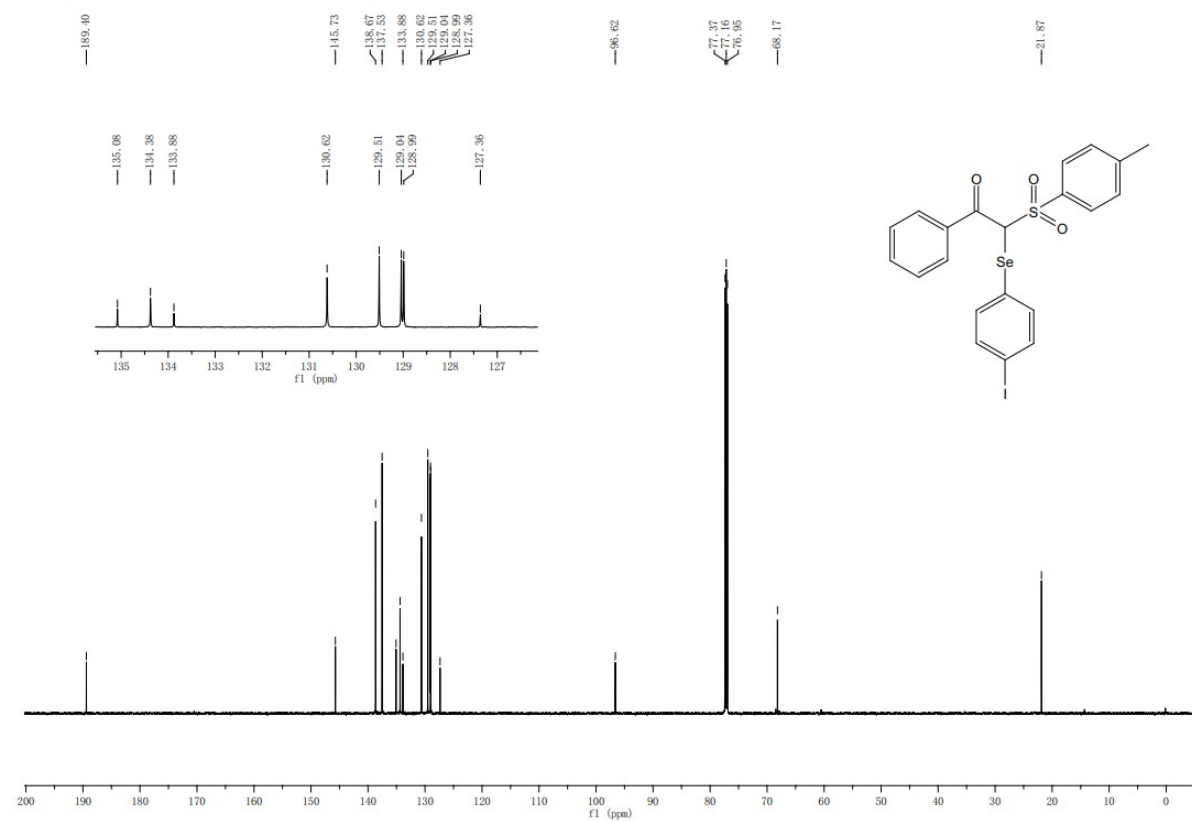

<sup>1</sup>H NMR of 4i

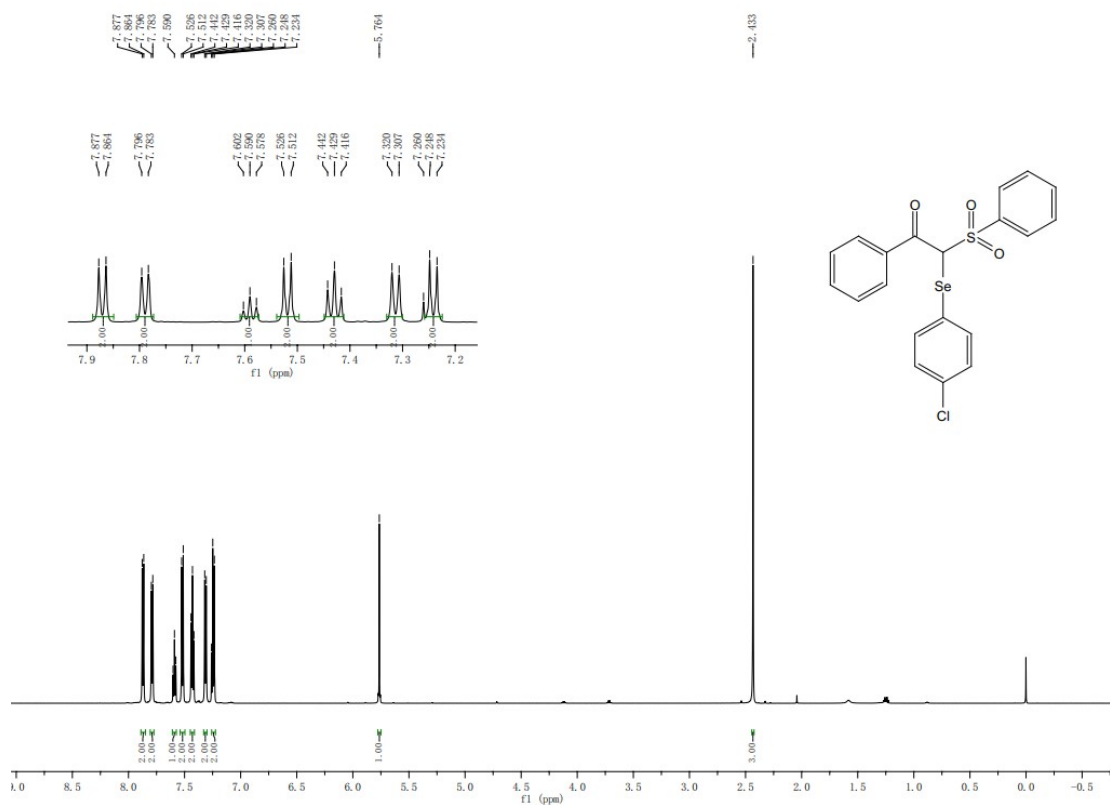

<sup>13</sup>C NMR of 4i

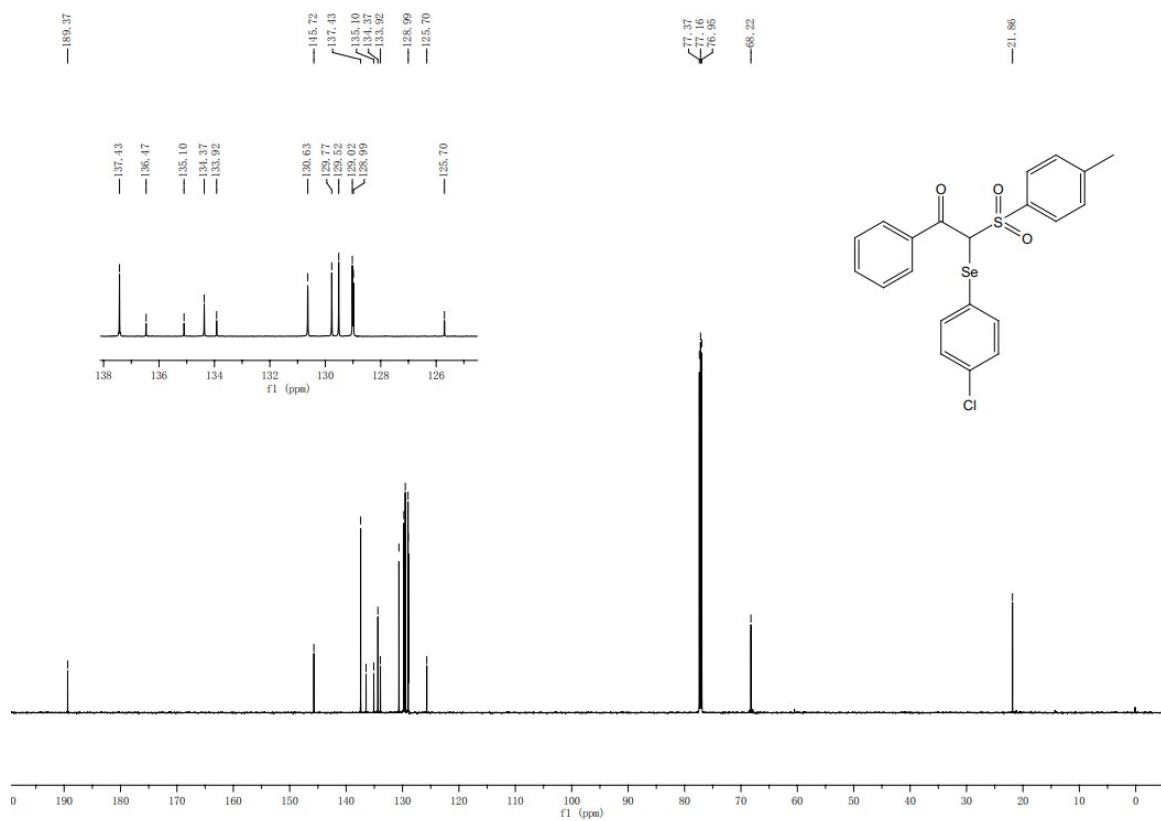

<sup>1</sup>H NMR of 4j

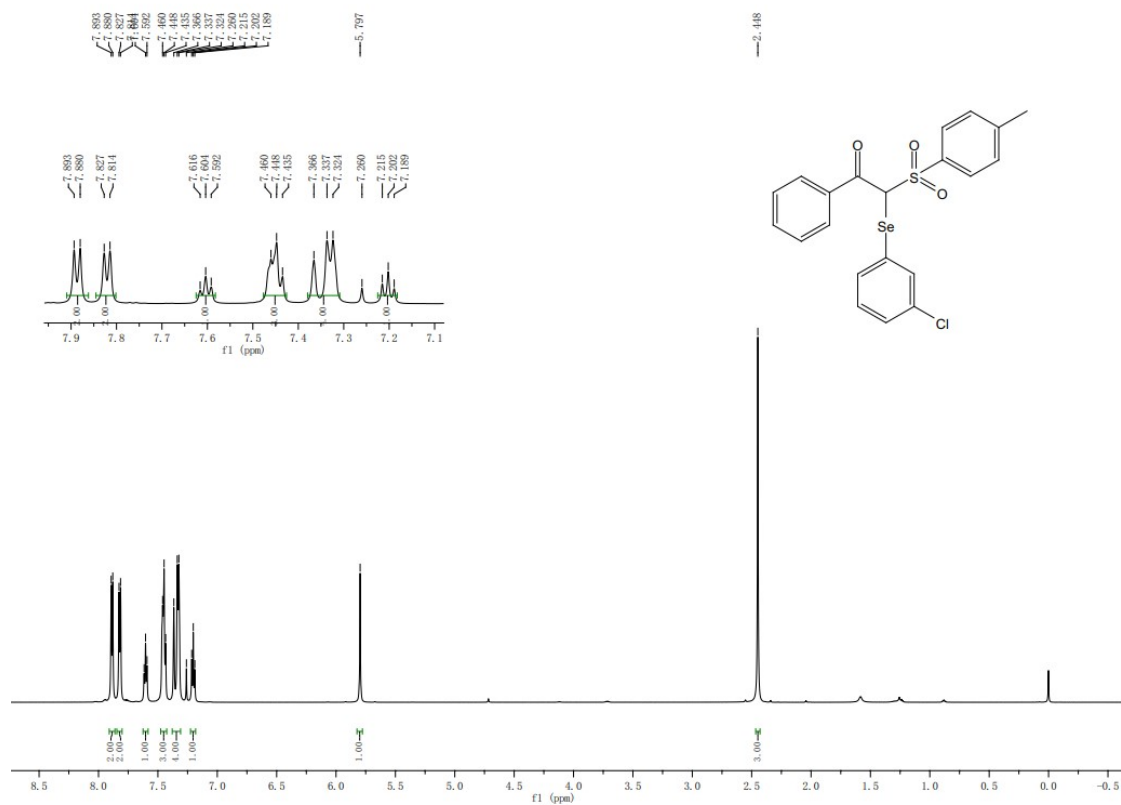

<sup>13</sup>C NMR of 4j

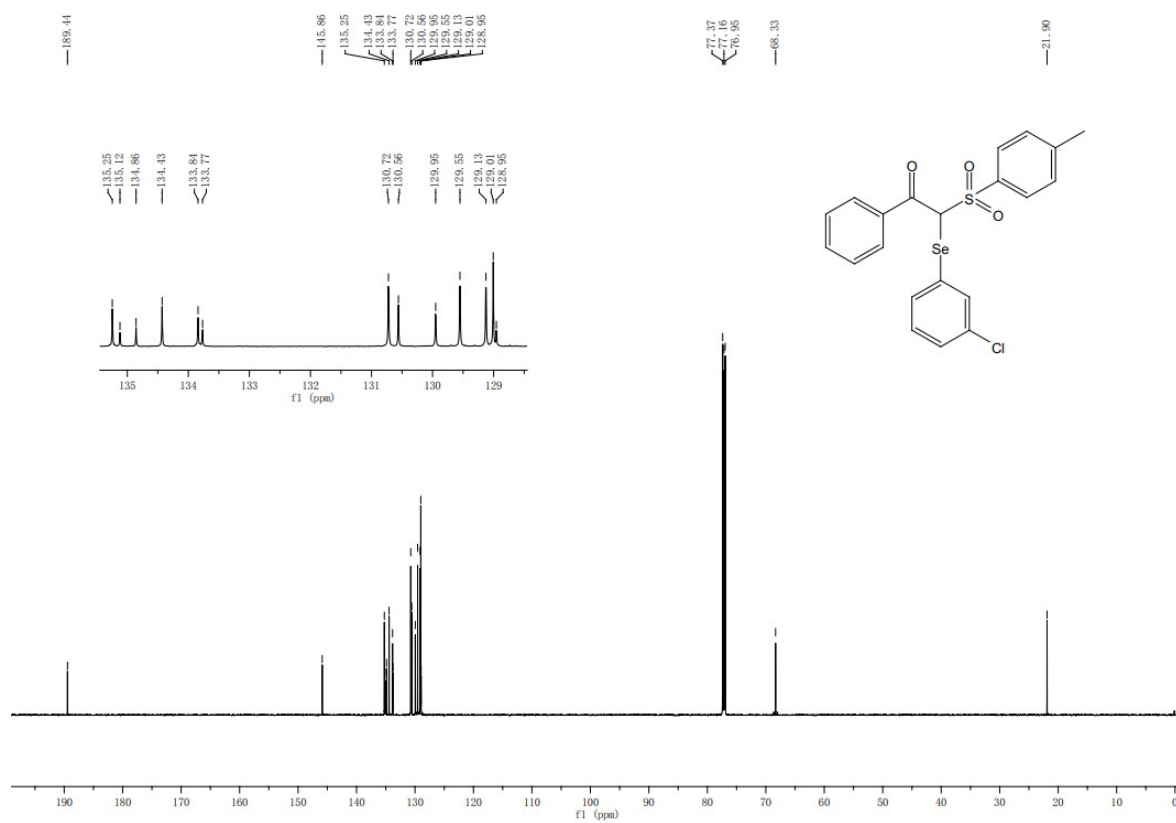

<sup>1</sup>H NMR of 4k

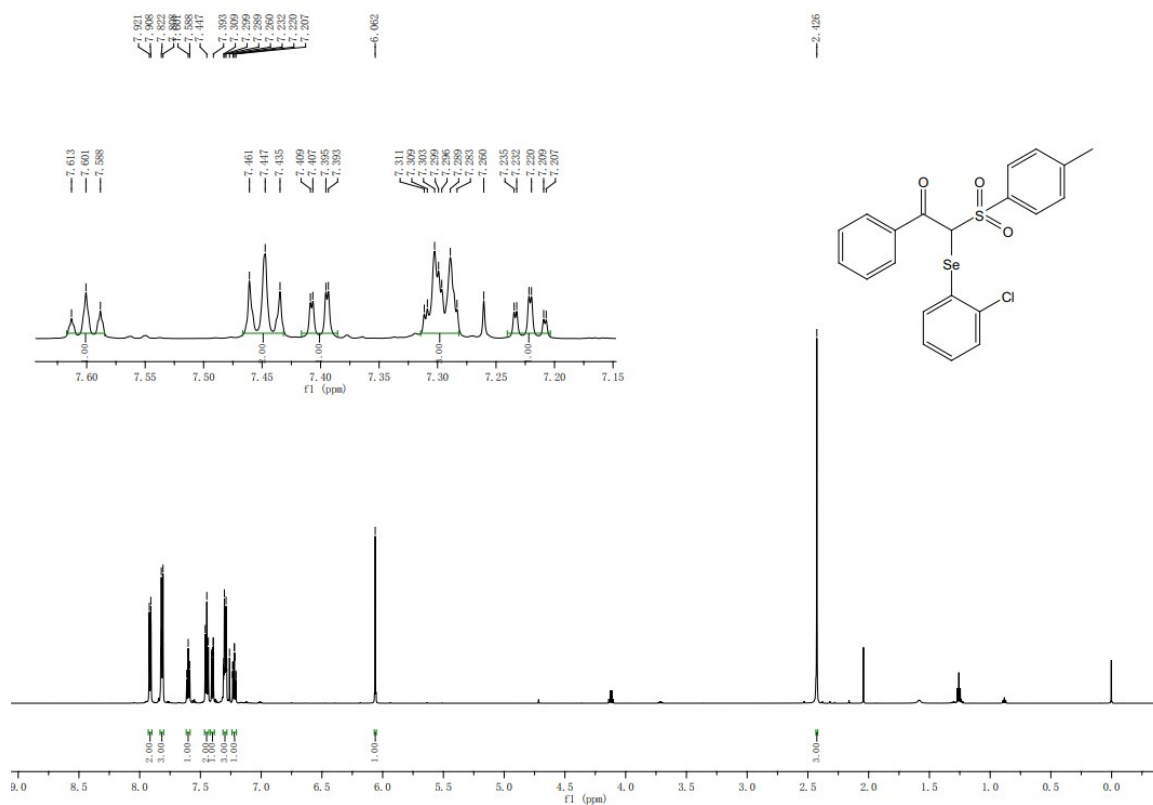

<sup>13</sup>C NMR of 4k

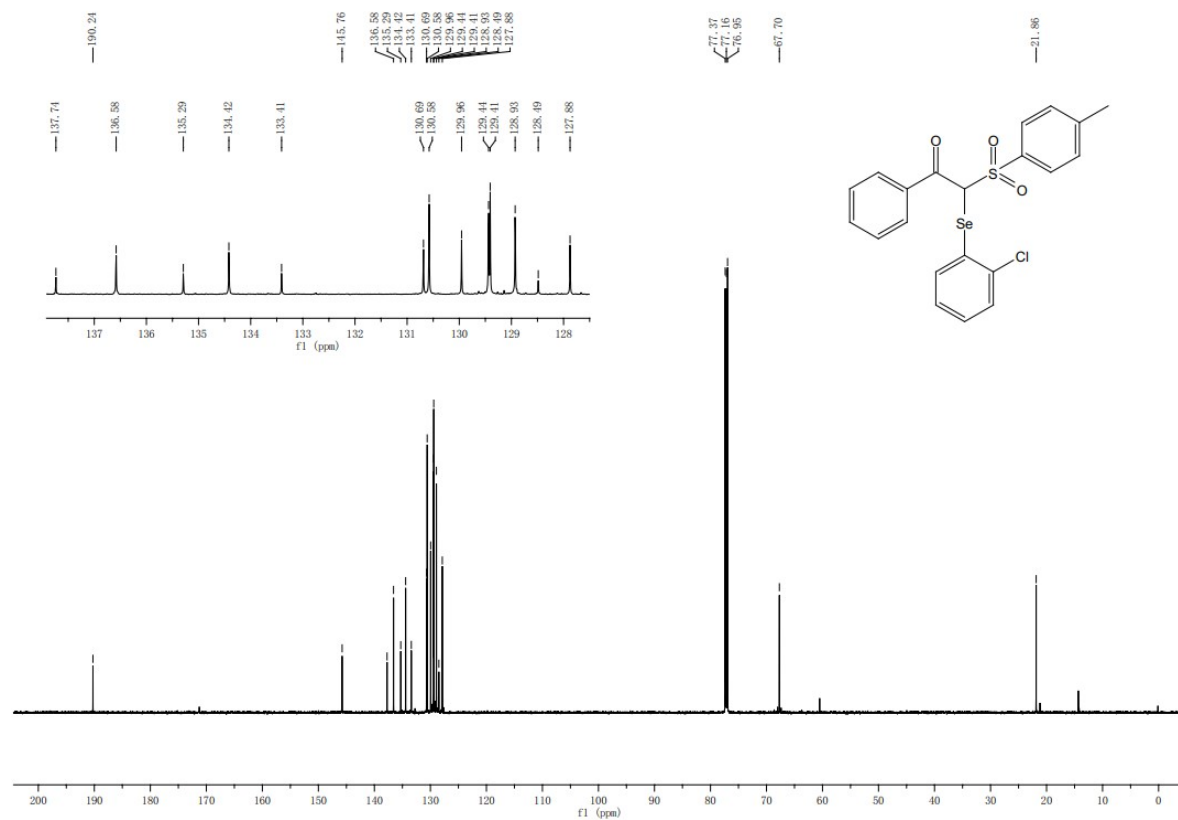

<sup>1</sup>H NMR of 4l

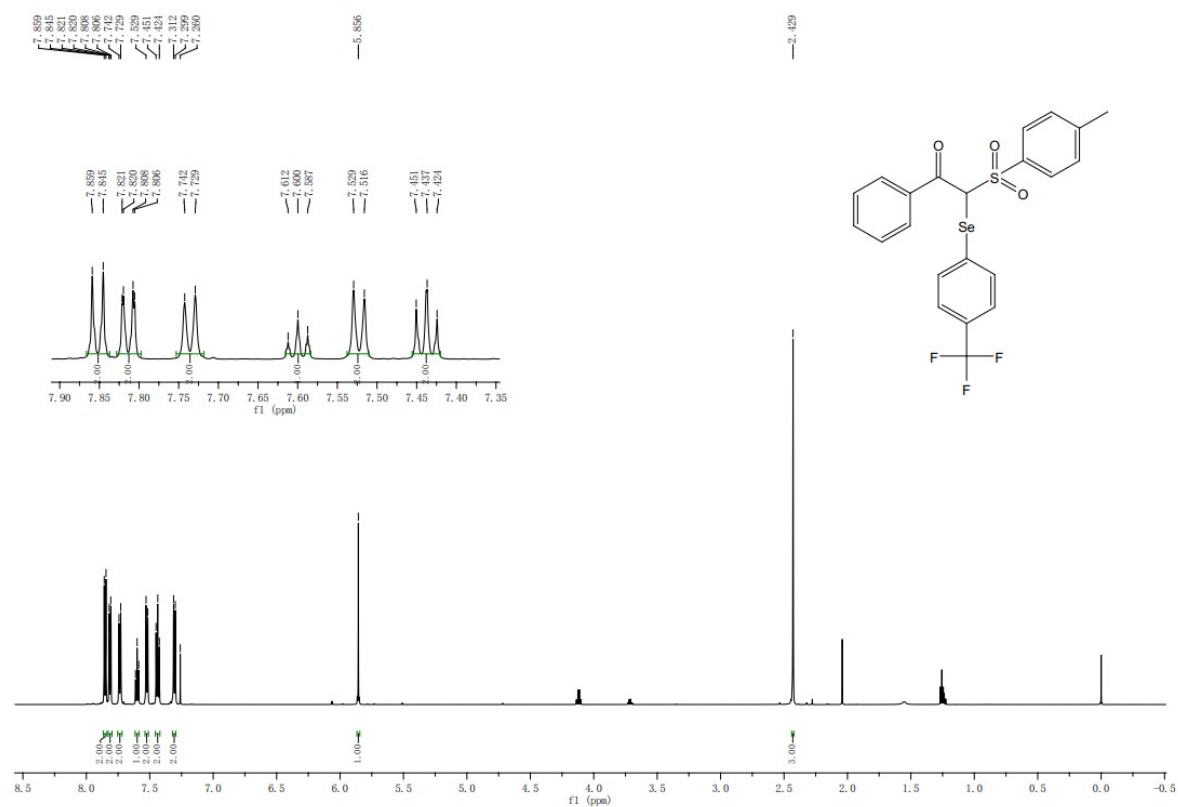

<sup>13</sup>C NMR of 4l

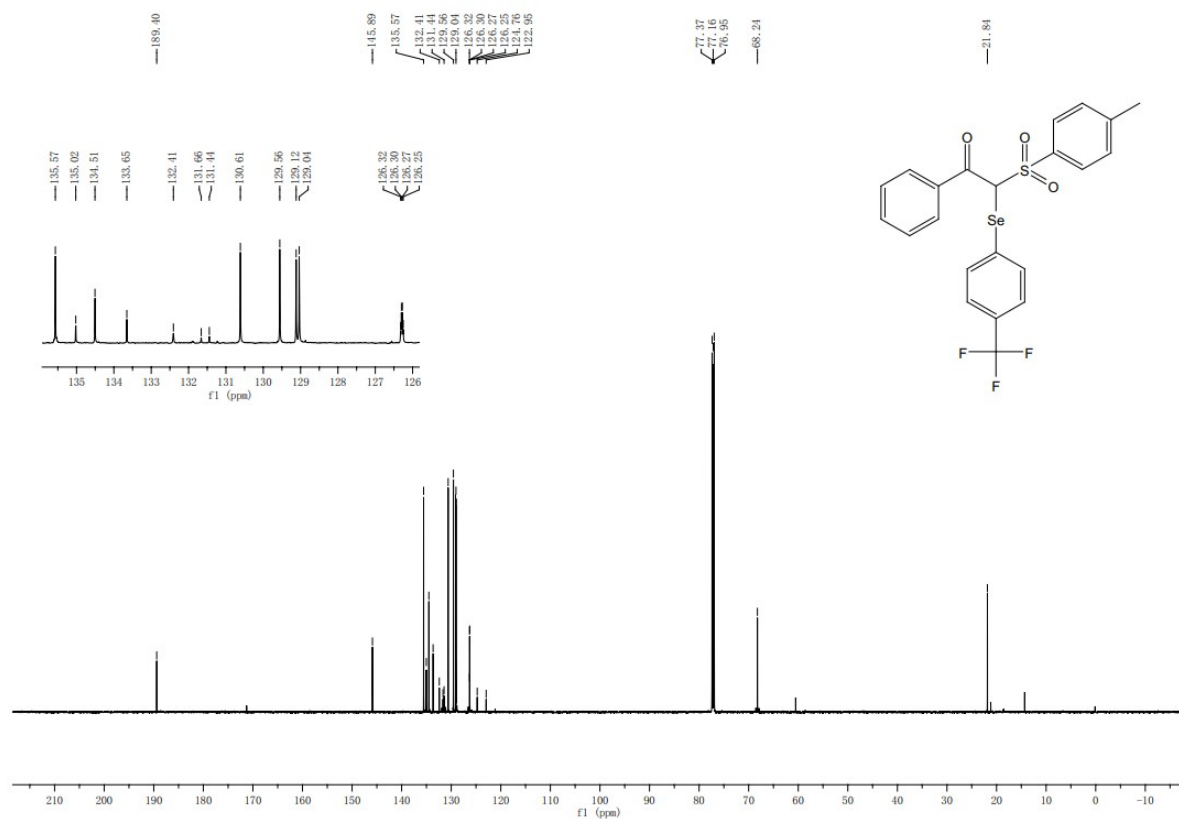

<sup>1</sup>H NMR of 4m

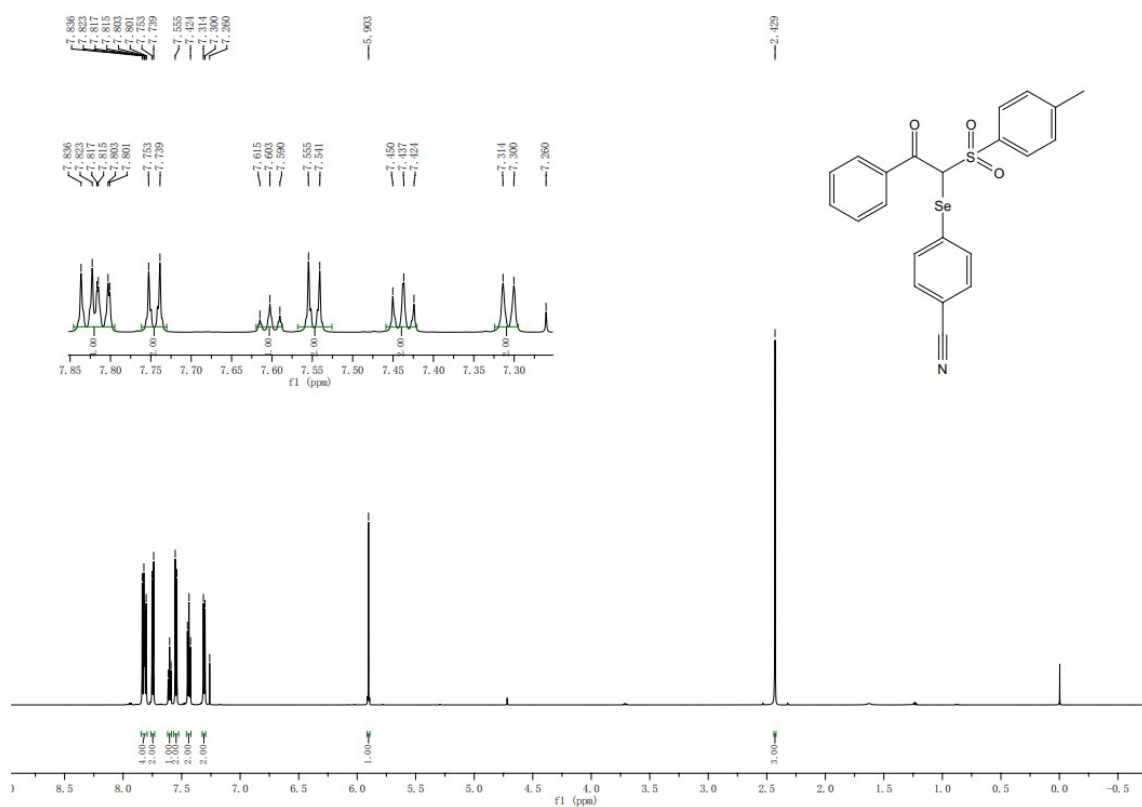

<sup>13</sup>C NMR of 4m

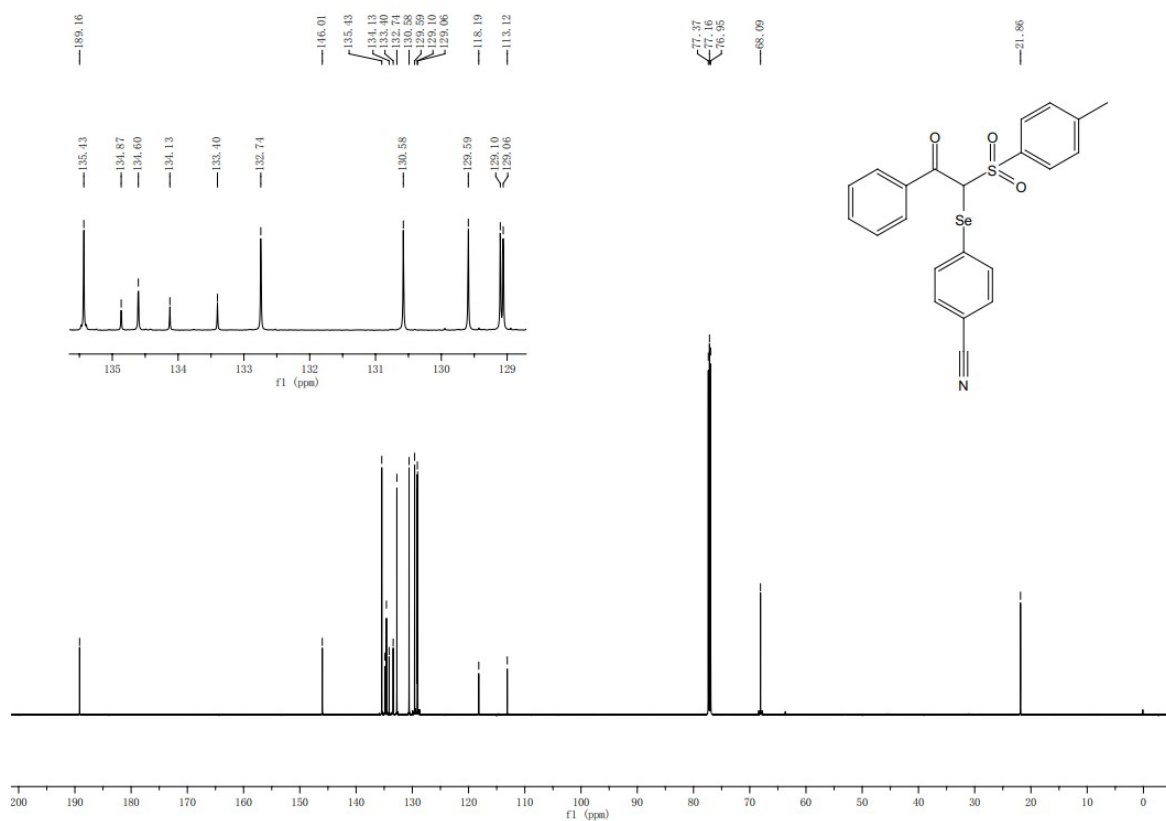

<sup>1</sup>H NMR of **4n**

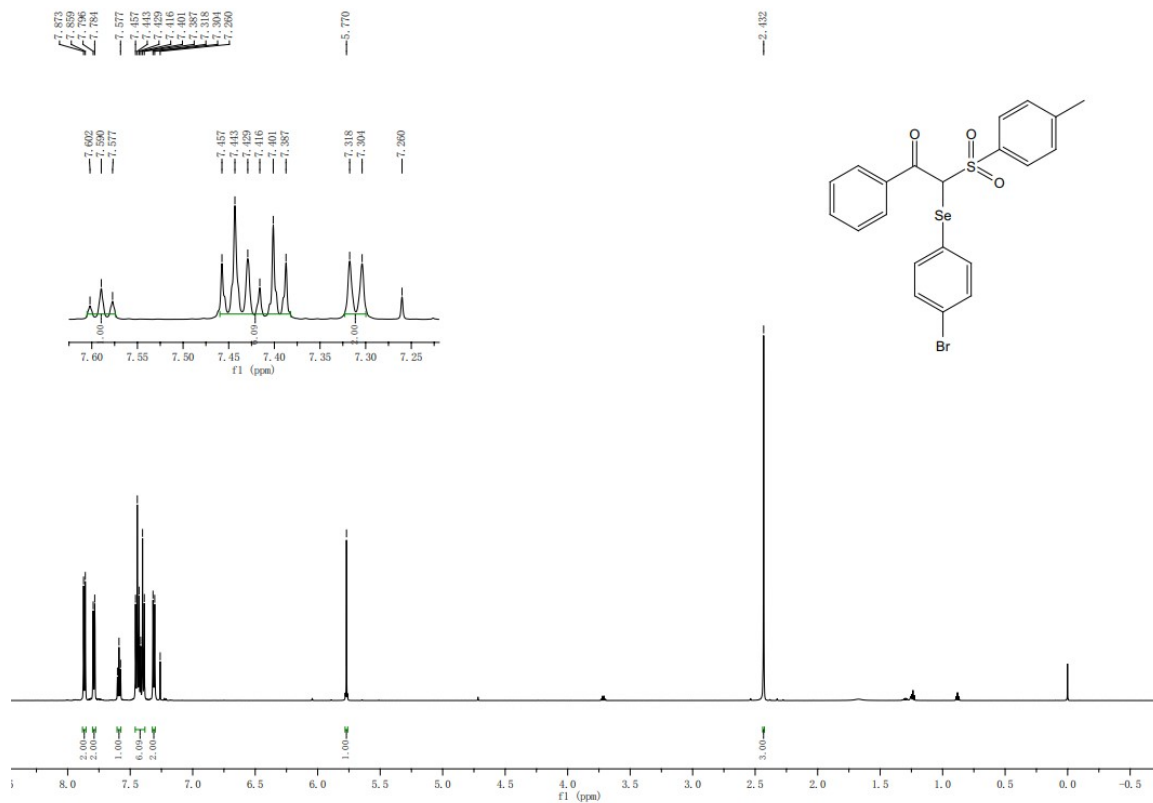

<sup>13</sup>C NMR of **4n**

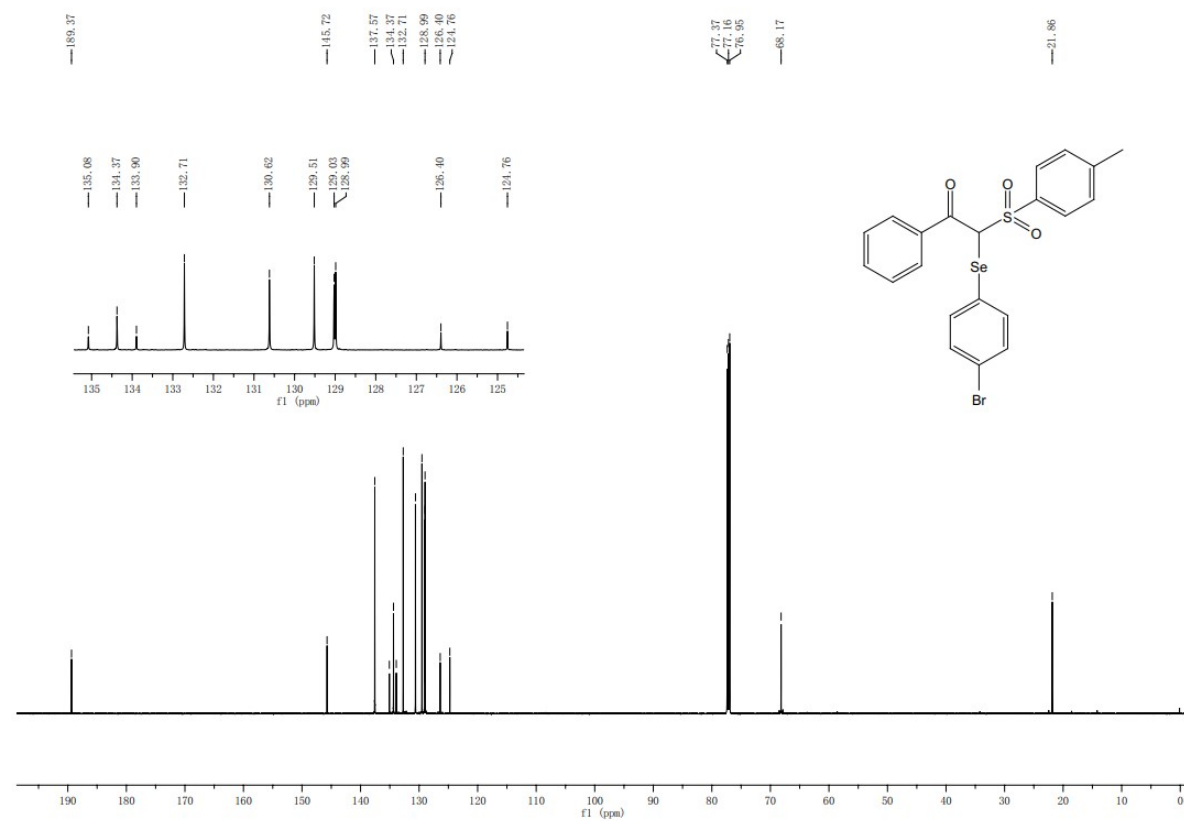

<sup>1</sup>H NMR of **4o**

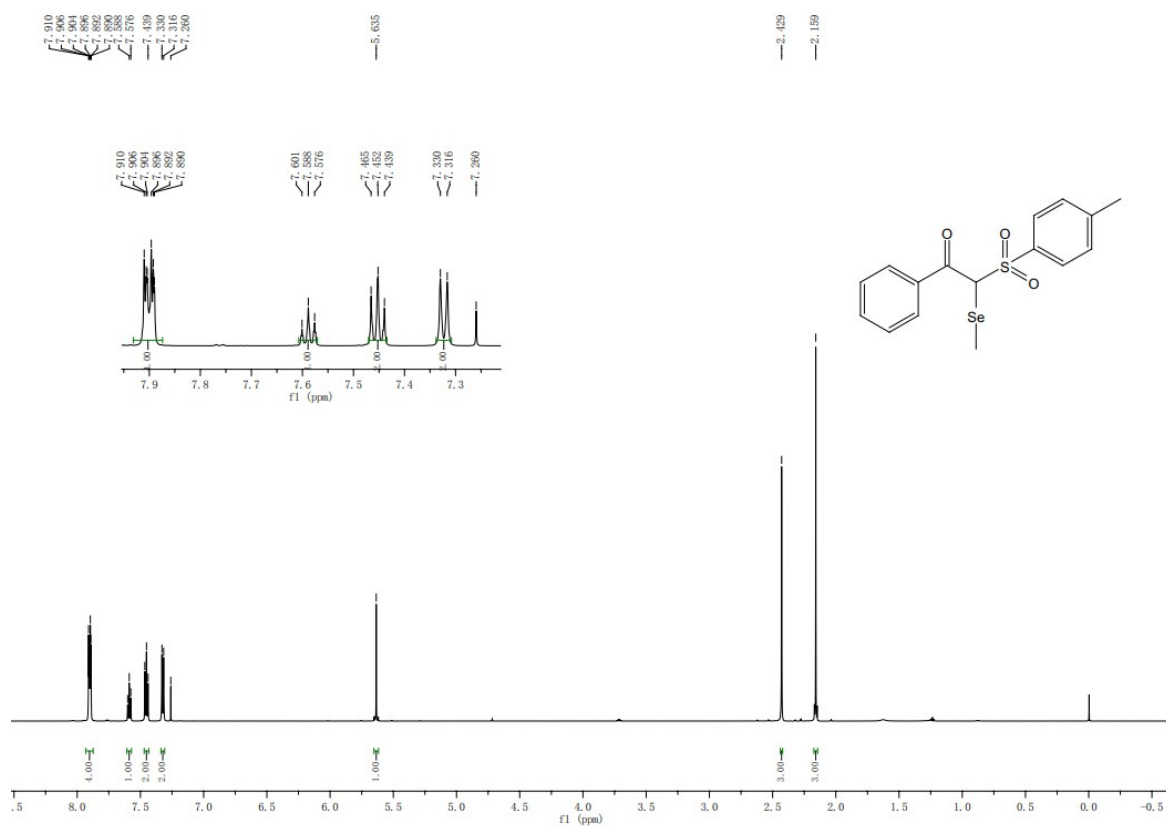

<sup>13</sup>C NMR of **4o**

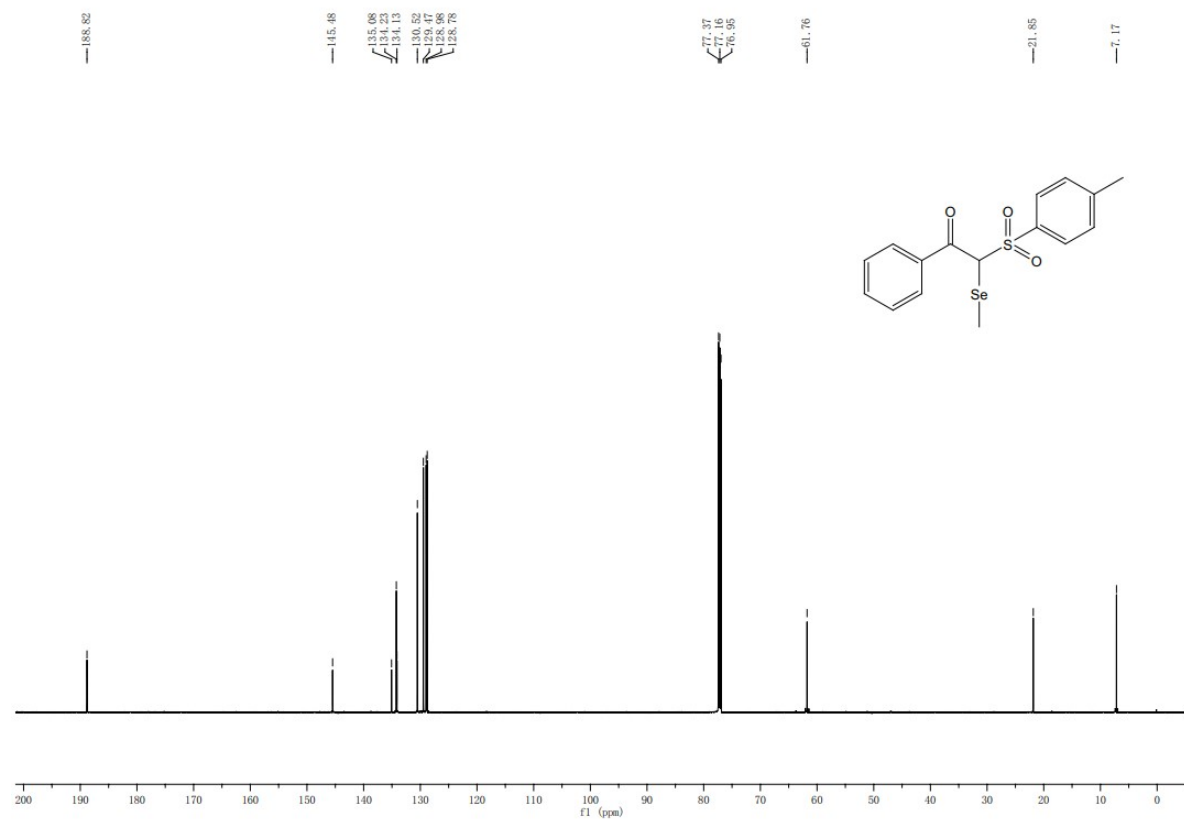



<sup>1</sup>H NMR of 4p

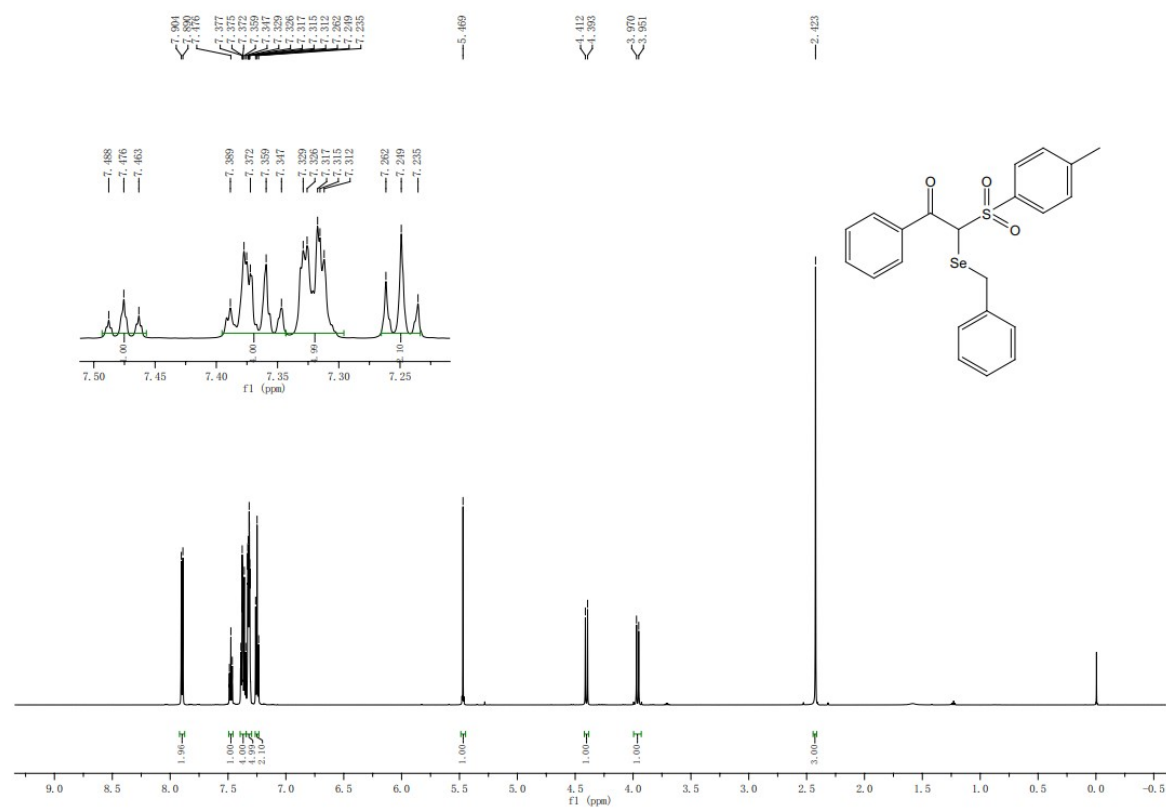

<sup>13</sup>C NMR of 4p

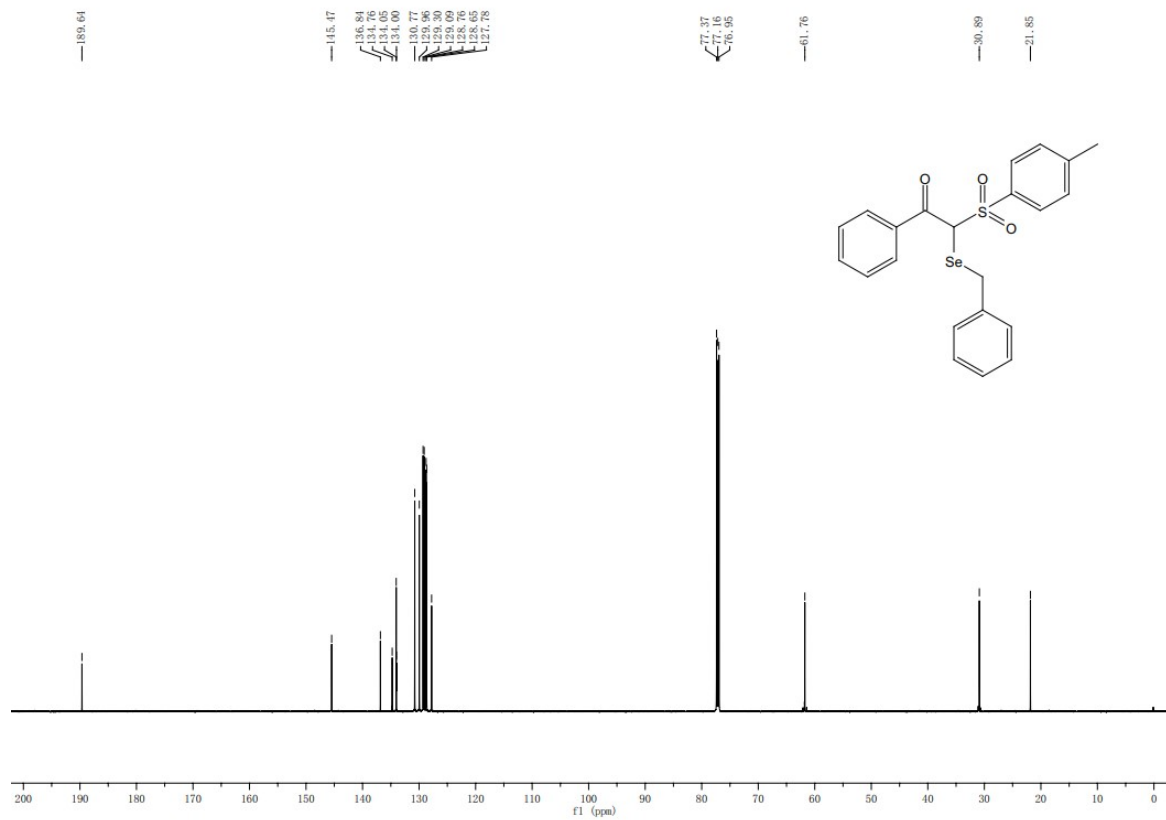

<sup>1</sup>H NMR of 4q

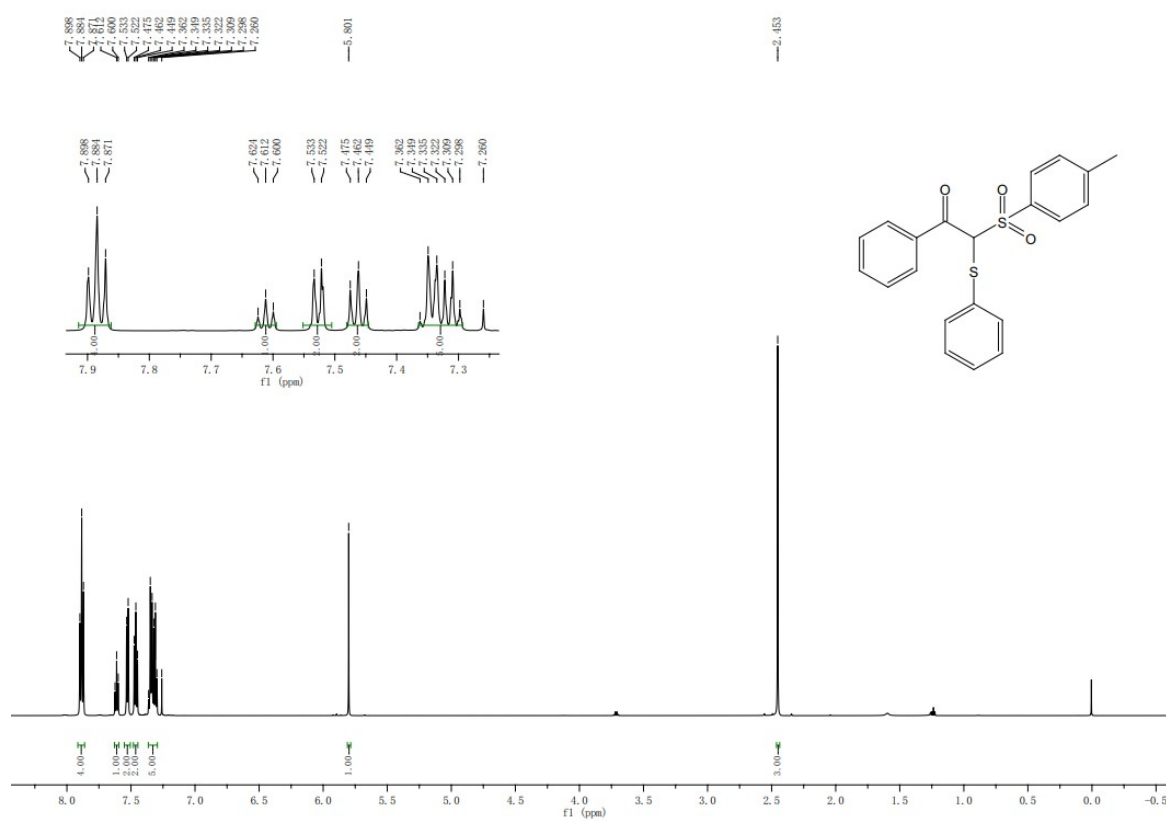

<sup>13</sup>C NMR of 4q

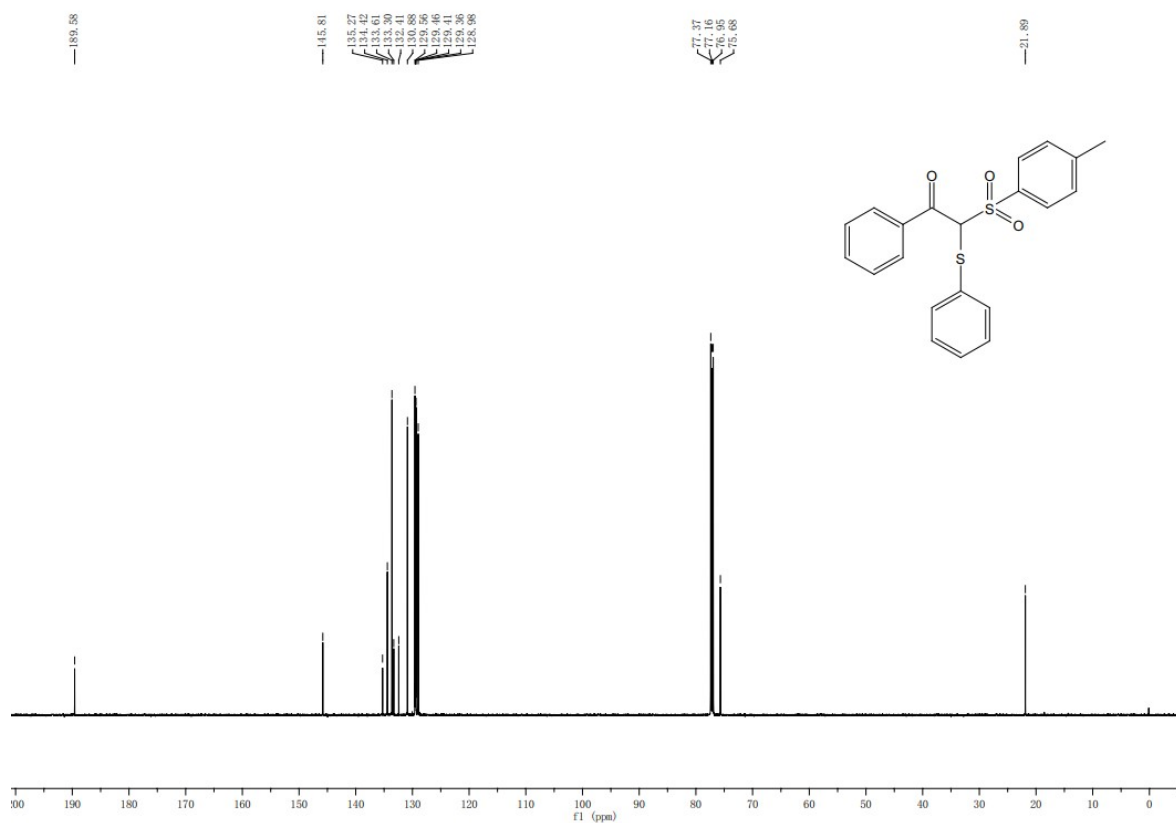

<sup>1</sup>H NMR of 5

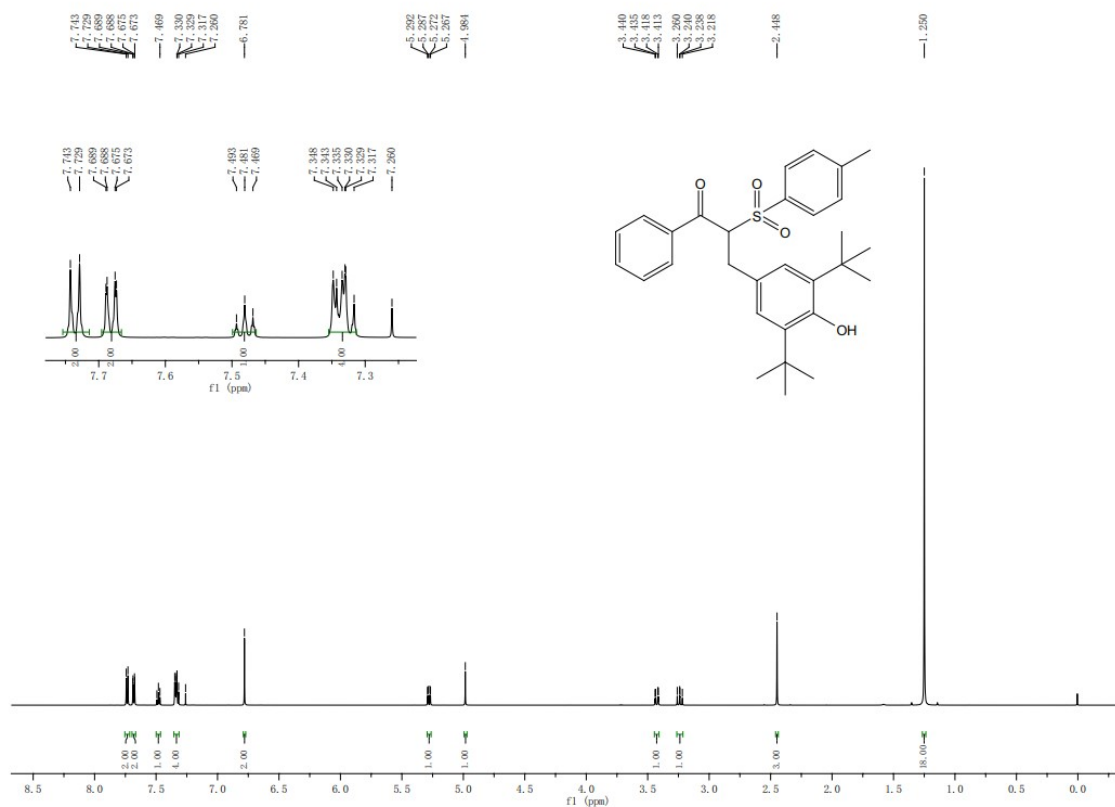

<sup>13</sup>C NMR of 5

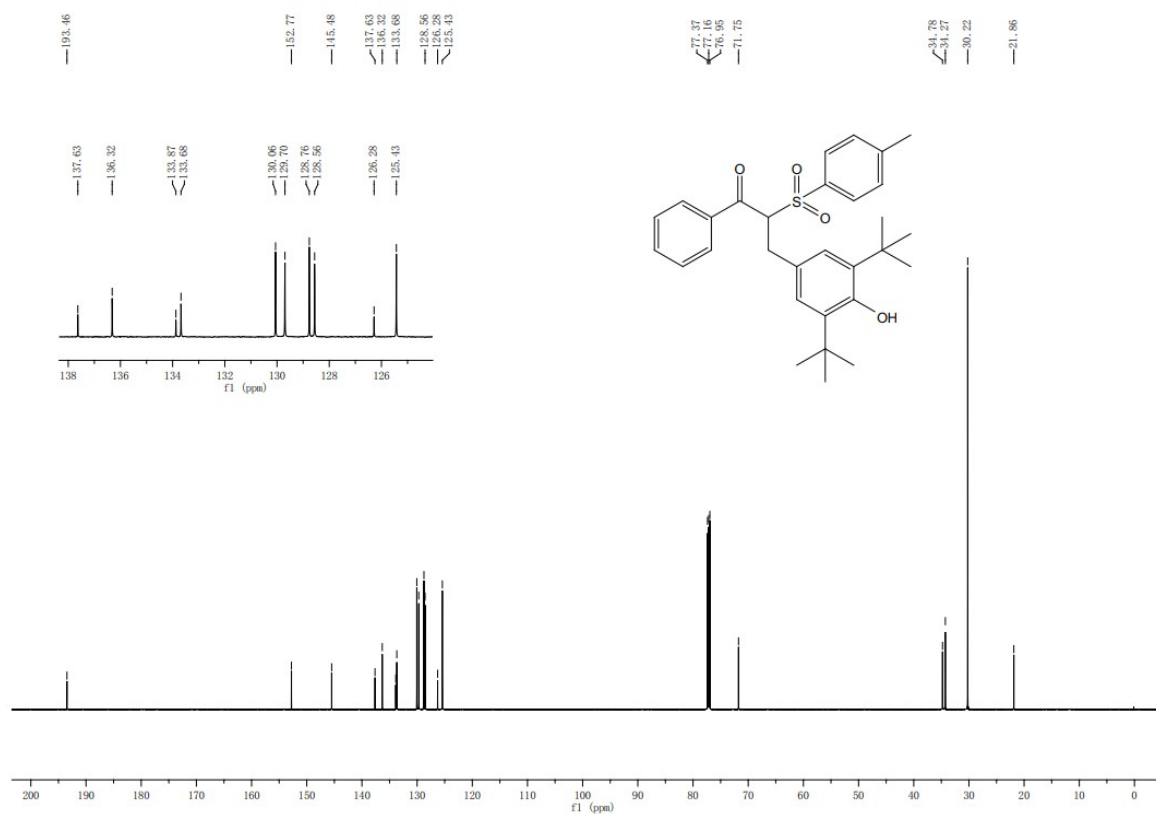

Supplement: d4ob00006d1.pdf [file d4ob00006d1.pdf]
